# Supplementary material
Source: PubMed Central journal article supplement (PMC9244849)
Supplement: NIHMS1816357-supplement-pain_2020_05_18_aouizerat_pain-19-01180_sdc1.pdf [file NIHMS1816357-supplement-pain_2020_05_18_aouizerat_pain-19-01180_sdc1.pdf]

| Cell_Line | GEO_Accession | Sample_ID  | Filename       | QC        | Cell Line Authentication | Phenotype Assignment |
|-----------|---------------|------------|----------------|-----------|--------------------------|----------------------|
| DOK       | GSE57083      | GSM1374468 | GSM1374468.CEL | Passed    | Authenticated            | NonNociceptive       |
| DOK       | GSE10063      | GSM254364  | GSM254364.CEL  | Passed    | Unknown                  | ---                  |
| DOK       | GSE10063      | GSM254369  | GSM254369.CEL  | Passed    | Unknown                  | ---                  |
| DOK       | GSE10063      | GSM254374  | GSM254374.CEL  | Passed    | Unknown                  | ---                  |
| DOK       | GSE10063      | GSM254379  | GSM254379.CEL  | Passed    | Unknown                  | ---                  |
| DOK       | GSE10063      | GSM254384  | GSM254384.CEL  | Passed    | Unknown                  | ---                  |
| DOK       | GSE10063      | GSM254389  | GSM254389.CEL  | Passed    | Unknown                  | ---                  |
| HaCaT     | GSE41445      | GSM1017467 | GSM1017467.CEL | Passed    | Authenticated            | NonNociceptive       |
| HaCaT     | GSE39293      | GSM960294  | GSM960294.CEL  | Passed    | Unknown                  | ---                  |
| HaCaT     | GSE20297      | GSM508815  | GSM508815.CEL  | Passed    | Unknown                  | ---                  |
| HaCaT     | GSE20297      | GSM508816  | GSM508816.CEL  | Passed    | Unknown                  | ---                  |
| HaCaT     | GSE20297      | GSM508817  | GSM508817.CEL  | Passed    | Unknown                  | ---                  |
| HaCaT     | GSE70512      | GSM1808252 | GSM1808252.CEL | Passed    | Unknown                  | ---                  |
| HaCaT     | GSE70512      | GSM1808253 | GSM1808253.CEL | Passed    | Unknown                  | ---                  |
| HaCaT     | GSE41445      | GSM1017466 | GSM1017466.CEL | Failed QC | Authenticated            | ---                  |
| HaCaT     | GSE41445      | GSM1017468 | GSM1017468.CEL | Failed QC | Authenticated            | ---                  |
| HSC-3     | GSE32056      | GSM794751  | GSM794751.CEL  | Passed    | Authenticated            | Nociceptive          |
| HSC-3     | GSE32056      | GSM794752  | GSM794752.CEL  | Passed    | Authenticated            | Nociceptive          |
| HSC-3     | GSE32056      | GSM794753  | GSM794753.CEL  | Passed    | Authenticated            | Nociceptive          |
| HSC-3     | GSE68722      | GSM1679826 | GSM1679826.CEL | Passed    | Unknown                  | ---                  |
| HSC-3     | GSE75127      | GSM1943674 | GSM1943674.CEL | Passed    | Unknown                  | ---                  |
| HSC-3     | GSE43862      | GSM1072426 | GSM1072426.CEL | Passed    | Unknown                  | ---                  |
| HSC-3     | GSE38058      | GSM933267  | GSM933267.CEL  | Passed    | Unknown                  | ---                  |
| HSC-3     | GSE38058      | GSM933268  | GSM933268.CEL  | Passed    | Unknown                  | ---                  |
| HSC-3     | GSE24783      | GSM610399  | GSM610399.CEL  | Passed    | Unknown                  | ---                  |
| NOK       | GSE59843      | GSM1422231 | GSM1422231.CEL | Passed    | Authenticated            | NonNociceptive       |
| NOK       | GSE59843      | GSM1422232 | GSM1422232.CEL | Passed    | Authenticated            | NonNociceptive       |
| NOK       | GSE57636      | GSM1385756 | GSM1385756.CEL | Passed    | Unknown                  | ---                  |
| NOK       | GSE57636      | GSM1385757 | GSM1385757.CEL | Passed    | Unknown                  | ---                  |
| PANC-1    | GSE23952      | GSM590166  | GSM590166.CEL  | Passed    | Authenticated            | Nociceptive          |
| PANC-1    | GSE23952      | GSM590167  | GSM590167.CEL  | Passed    | Authenticated            | Nociceptive          |
| PANC-1    | GSE23952      | GSM590168  | GSM590168.CEL  | Passed    | Authenticated            | Nociceptive          |
| PANC-1    | GSE64337      | GSM1568739 | GSM1568739.CEL | Passed    | Authenticated            | Nociceptive          |
| PANC-1    | GSE64337      | GSM1568740 | GSM1568740.CEL | Passed    | Authenticated            | Nociceptive          |
| PANC-1    | GSE64337      | GSM1568741 | GSM1568741.CEL | Passed    | Authenticated            | Nociceptive          |
| PANC-1    | GSE35351      | GSM866688  | GSM866688.CEL  | Passed    | Authenticated            | Nociceptive          |
| PANC-1    | GSE35351      | GSM866689  | GSM866689.CEL  | Passed    | Authenticated            | Nociceptive          |
| PANC-1    | GSE35351      | GSM866690  | GSM866690.CEL  | Passed    | Authenticated            | Nociceptive          |
| PANC-1    | GSE35351      | GSM866691  | GSM866691.CEL  | Passed    | Authenticated            | Nociceptive          |
| PANC-1    | GSE46385      | GSM1129598 | GSM1129598.CEL | Passed    | Authenticated            | Nociceptive          |
| PANC-1    | GSE44946      | GSM1094286 | GSM1094286.CEL | Passed    | Authenticated            | Nociceptive          |
| PANC-1    | GSE44946      | GSM1094288 | GSM1094288.CEL | Passed    | Authenticated            | Nociceptive          |
| PANC-1    | GSE21654      | GSM540395  | GSM540395.CEL  | Passed    | Authenticated            | Nociceptive          |
| PANC-1    | GSE44946      | GSM1094287 | GSM1094287.CEL | Passed    | Authenticated            | Nociceptive          |
| SCC-4     | GSE36133      | GSM887560  | GSM887560.CEL  | Failed QC | Authenticated            | ---                  |
| SCC-4     | GSE57083      | GSM1374865 | GSM1374865.CEL | Passed    | Authenticated            | Nociceptive          |
| SCC-4     | GSE893029     | GSM593029  | GSM593029.CEL  | Passed    | Unknown                  | ---                  |
| SCC-9     | GSE57083      | GSM1374866 | GSM1374866.CEL | Passed    | Authenticated            | Nociceptive          |
| SKMel-28  | GSE41445      | GSM1017502 | GSM1017502.CEL | Passed    | Authenticated            | NonNociceptive       |
| SKMel-28  | GSE41445      | GSM1017503 | GSM1017503.CEL | Passed    | Authenticated            | NonNociceptive       |
| SKMel-28  | GSE41445      | GSM1017504 | GSM1017504.CEL | Passed    | Authenticated            | NonNociceptive       |
| SKMel-28  | GSE34211      | GSM844690  | GSM844690.CEL  | Passed    | Authenticated            | NonNociceptive       |
| SKMel-28  | GSE8332       | GSM206543  | GSM206543.CEL  | Passed    | Authenticated            | NonNociceptive       |
| SKMel-28  | GSE7127       | GSM171012  | GSM171012.CEL  | Passed    | Authenticated            | NonNociceptive       |
| SKMel-28  | GSE10843      | GSM274690  | GSM274690.CEL  | Passed    | Unknown                  | ---                  |

**Aggregated Papers from Proteomic Literature Search**

| <b>Gene Name</b> | <b>Protein Name</b>                                                    | <b>Paper (PMID)</b> |
|------------------|------------------------------------------------------------------------|---------------------|
| LGALS3BP         | Galectin-3-binding protein                                             | 22905270            |
| PFN1             | Pro ilin-1                                                             | 22905270            |
| ANXA3            | Annexin A3                                                             | 22905270            |
| ANXA5            | Annexin A5                                                             | 22905270            |
| RAC1             | so orm A o Ras-related C3 botulinum toxin substrate 1                  | 22905270            |
| ENO3             | so orm 1 o Beta-enolase                                                | 22905270            |
| ENO1             | so orm alpha-enolase o Alpha-enolase                                   | 22905270            |
| ANXA8L2          | so orm 2 o Annexin A8-like protein 2                                   | 22905270            |
| SLC3A2           | so orm 2 o 4F2 cell-sur ace antigen heavy chain                        | 22905270            |
| PKP3             | Plakophilin-3                                                          | 22905270            |
| CALR             | Calreticulin                                                           | 22905270            |
| CLTC             | so orm 1 o Clathrin heavy chain 1                                      | 22905270            |
| PLEC             | so orm 1 o Plectin-1                                                   | 22905270            |
| MDH1             | Putative uncharacterized protein MDH1                                  | 22905270            |
| TLN1             | alin-1                                                                 | 22905270            |
| CTSD             | Cathepsin D                                                            | 22905270            |
| CTSH             | Cathepsin H                                                            | 22905270            |
| MMP1             | nterstitial collagenase                                                | 22905270            |
| KLK0             | Kallikrein-10                                                          | 22905270            |
| THBS1            | hrombospondin-1                                                        | 22905270            |
| GSN              | so orm 1 o Gelsolin                                                    | 22905270            |
| SDC1             | Syndecan-1                                                             | 22905270            |
| RANGAP1          | Ran G Pase-activating protein 1                                        | 22905270            |
| ANXA1            | Annexin A1                                                             | 22905270            |
| FN1              | so orm 1 o Fibronectin                                                 | 22905270            |
| LAMA3            | so orm 1 o Laminin subunit alpha-3                                     | 22905270            |
| LAMB3            | Laminin subunit beta-3                                                 | 22905270            |
| LAMA5            | Laminin subunit alpha-5                                                | 22905270            |
| EZH2             | enhancer zeste homolog 2                                               | 26604082            |
| CDC7             | Cdc7                                                                   | 23684929            |
| ANX1             | Annexin A1                                                             | 26234610            |
| CDABP0047        | Glyceraldehyde-3-phosphate dehydrogenase                               | 26234610            |
| GAR1             | H/ACA ribonucleoprotein complex subunit 1                              | 26234610            |
| --               | cDNA FLJ54303 highly similar to Heat shock 70 kDa protein 1            | 26234610            |
| CKAP4            | 63 kDa membrane protein                                                | 26234610            |
| ANX2LG           | Calpactin light chain                                                  | 26234610            |
| ANP32A           | Acidic leucine-rich nuclear phosphoprotein 32 amily member A           | 26234610            |
| ALPP             | Alkaline phosphatase Regan isozyme                                     | 26234610            |
| CYK18            | Cell proli eration-inducing gene 46 protein                            | 26234610            |
| EPIPL            | 450 kDa epidermal antigen                                              | 26234610            |
| G22P2            | 86 kDa subunit o Ku antigen                                            | 26234610            |
| SET              | HLA-DR-associated protein                                              | 26234610            |
| SPTAN1           | Putative uncharacterized protein SP AN1                                | 26234610            |
| G19P1            | 80K-H protein                                                          | 26234610            |
| HSPA1            | Heat shock 70 kDa protein 1/2                                          | 26234610            |
| PFN1             | Pro ilin                                                               | 26234610            |
| CCT5             | CC -epsilon                                                            | 26234610            |
| ALDC             | Brain-type aldolase                                                    | 26234610            |
| NAP1L1           | NAP-1-related protein                                                  | 26234610            |
| ANX2             | Annexin A2                                                             | 26234610            |
| FNRB             | Fibronectin receptor subunit beta                                      | 26234610            |
| JUP              | cDNA FLJ60424 highly similar to Junction plakoglobin                   | 26234610            |
| OIP3             | Cytosolic thyroid hormone-binding protein                              | 26234610            |
| CDC21            | CDC21 homolog                                                          | 26234610            |
| Ov Br septin     | cDNA FLJ55422 highly similar to Septin-9                               | 26234610            |
| MDU1             | 4F2 cell-sur ace antigen heavy chain                                   | 26234610            |
| EDMD             | Emerin                                                                 | 26234610            |
| RPL17            | 60S ribosomal protein L17                                              | 26234610            |
| ERAB             | 17-beta-hydroxysteroid dehydrogenase 10                                | 26234610            |
| ALDA             | Fructose-bisphosphate aldolase A                                       | 26234610            |
| EZR              | Cytovillin                                                             | 26234610            |
| HSP90A           | Heat shock 86 kDa                                                      | 26234610            |
| CDHF5            | Cadherin amily member 5                                                | 26234610            |
| FUBP1            | DNA helicase V                                                         | 26234610            |
| NDUFB10          | Complex -PDSW                                                          | 26234610            |
| HNRNPA1          | Helix-destabilizing protein                                            | 26234610            |
| EEF1D            | elongation actor 1 delta (guanine nucleotide exchange protein) (EEF1D) | 26234610            |
| RCN              | Reticulocalbin-1                                                       | 26234610            |
| TPM4             | M30p1                                                                  | 26234610            |
| ZNF207           | Zinc inger protein 207 variant                                         | 26234610            |
| HDGF             | Hepatoma-derived growth actor (High-mobility group protein 1-like)     | 26234610            |
| UQCRC2           | Complex subunit 2                                                      | 26234610            |
| hCG 22755        | umor protein D52-like 2                                                | 26234610            |
| ILF2             | nterleukin enhancer-binding actor 2                                    | 26234610            |
| FTH1             | Ferritin                                                               | 26234610            |
| ECHS1            | Enoyl-CoA hydratase 1                                                  | 26234610            |

|                   |                                                                          |          |
|-------------------|--------------------------------------------------------------------------|----------|
| BCLAF1            | Bcl-2-associated transcription actor 1                                   | 26234610 |
| CCDC86            | Coiled-coil domain-containing protein 86                                 | 26234610 |
| AHNAK             | Desmoyokin                                                               | 26234610 |
| BAT1              | 56 kDa U2AF65-associated protein                                         | 26234610 |
| C21orf33          | ES1 protein homolog mitochondrial                                        | 26234610 |
| PC4               | Activated RNA polymerase transcriptional coactivator p15                 | 26234610 |
| CPD               | Carboxypeptidase D                                                       | 26234610 |
| TUFM              | Elongation actor u mitochondrial                                         | 26234610 |
| NUDC              | Nuclear distribution protein C homolog                                   | 26234610 |
| YWHAE             | 14-3-3 protein epsilon                                                   | 26234610 |
| NPM               | Nucleolar phosphoprotein B23                                             | 26234610 |
| SNRPD3            | Small nuclear ribonucleoprotein Sm D3                                    | 26234610 |
| RPS13             | 40S ribosomal protein S13                                                | 26234610 |
| RPL8              | 60S ribosomal protein L8                                                 | 26234610 |
| KIAA0568          | 190 kDa paraneoplastic pemphigus antigen                                 | 26234610 |
| MIG10             | Cell migration-inducing gene 10 protein                                  | 26234610 |
| SAFB              | SAFB protein                                                             | 26234610 |
| EWSR1             | PRO E N EWS                                                              | 26234610 |
| NAP1L4            | Nucleosome assembly protein 1-like 4                                     | 26234610 |
| IKBIP             | nhibitor o nuclear actor kappa-B kinase-interacting protein              | 26234610 |
| BM28              | cDNA FLJ53276 moderately similar to DNA replication licensing actor MCM2 | 26234610 |
| RBM4              | La k homolog                                                             | 26234610 |
| STIP1             | phosphoprotein 1 (Hsp70/Hsp90-organizing protein) (S P1) mRNA            | 26234610 |
| EEF2              | Elongation actor 2                                                       | 26234610 |
| DDX46             | DEAD (Asp-Glu-Ala-Asp) box polypeptide 46 iso orm CRA a                  | 26234610 |
| G3BP              | A P-dependent DNA helicase V                                             | 26234610 |
| DRBF              | Double-stranded RNA-binding protein 76                                   | 26234610 |
| CLTB              | Clathrin light chain B                                                   | 26234610 |
| HSP105            | Antigen NY-CO-25                                                         | 26234610 |
| hCG 25936         | riosephosphate isomerase                                                 | 26234610 |
| C21orf50          | Bax antagonist selected in saccharomyces 1                               | 26234610 |
| SPTB2             | Beta- spectrin                                                           | 26234610 |
| DKFZp686E2459     | Putative uncharacterized protein DKFZp686E2459                           | 26234610 |
| GLT25D1           | Glycosyltrans erase 25 amily member 1                                    | 26234610 |
| BAZ1B             | Bromodomain adjacent to zinc inger domain protein 1B                     | 26234610 |
| AKAP12            | A-kinase anchor protein 12                                               | 26234610 |
| RAB11FIP1         | Rab11 amily-interacting protein 1                                        | 26234610 |
| DUT               | Deoxyuridine 5-triphosphate nucleotidohydrolase mitochondrial            | 26234610 |
| hCG 2031827       | PABPC4 protein                                                           | 26234610 |
| ACLY variant prot | ACLY variant protein                                                     | 26234610 |
| RPL7              | 60S ribosomal protein L7                                                 | 26234610 |
| MYH9              | Cellular myosin heavy chain type A                                       | 26234610 |
| PLEC1             | Hemidesmosomal protein 1                                                 | 26234610 |
| SFRS7             | Splicing actor 9G8                                                       | 26234610 |
| OK SW-cl.56       | ubulin beta chain                                                        | 26234610 |
| CG1               | CG-1 antigen                                                             | 26234610 |
| FUS               | 75 kDa DNA-pairing protein                                               | 26234610 |
| COX5A             | Cytochrome c oxidase polypeptide Va                                      | 26234610 |
| H1F4              | Histone H1 4                                                             | 26234610 |
| HNRNPA3           | Heterogeneous nuclear ribonucleoprotein A3                               | 26234610 |
| C1orf77           | Uncharacterized protein C1or 77                                          | 26234610 |
| CTA-216E10.8-00   | NHP2 non-histone chromosome protein 2-like 1 (S cerevisiae)              | 26234610 |
| ERP57             | 58 kDa glucose-regulated protein                                         | 26234610 |
| ATP2A2            | Calcium pump 2                                                           | 26234610 |
| HNRNPUL2          | Heterogeneous nuclear ribonucleoprotein U-like protein 2                 | 26234610 |
| IGF2BP3           | GF- mRNA-binding protein 3                                               | 26234610 |
| TMED10            | 21 kDa transmembrane-tra icking protein                                  | 26234610 |
| KIAA0719          | Mitochondrial import receptor subunit OM70                               | 26234610 |
| PDHA1             | cDNA FLJ59461 highly similar to Pyruvate dehydrogenase E1 component alp  | 26234610 |
| ATP5B             | A P synthase subunit beta mitochondrial                                  | 26234610 |
| DLD               | Dihydrolipoamide dehydrogenase                                           | 26234610 |
| DLST              | 2-oxoglutarate dehydrogenase complex component E2                        | 26234610 |
| TRP32             | 32 kDa thioredoxin-related protein                                       | 26234610 |
| ERBA2L            | Cellular thyroid hormone-binding protein                                 | 26234610 |
| GRP94             | 94 kDa glucose-regulated protein                                         | 26234610 |
| CAS               | Cellular apoptosis susceptibility protein                                | 26234610 |
| ABBP1             | APOBEC1-binding protein 1                                                | 26234610 |
| ATP5A             | A P synthase subunit alpha mitochondrial                                 | 26234610 |
| KIAA0268          | C219-reactive peptide                                                    | 26234610 |
| NDUFV2            | NADH dehydrogenase [ubiquinone lavoprotein 2 mitochondrial               | 26234610 |
| TIM9              | Mitochondrial import inner membrane translocase subunit im9              | 26234610 |
| MDH2              | Malate dehydrogenase mitochondrial                                       | 26234610 |
| LRRC59            | Leucine-rich repeat-containing protein 59                                | 26234610 |
| CBP1              | 47 kDa heat shock protein                                                | 26234610 |
| H2AFC             | Histone H2A type 1                                                       | 26234610 |
| SDH2              | cDNA FLJ37560 is clone BRCOC2000333 highly similar to Succinate dehyd    | 26234610 |
| H4 A              | Histone H4                                                               | 26234610 |
| ANT2              | Adenine nucleotide translocator 2                                        | 26234610 |

|                  |                                                             |          |
|------------------|-------------------------------------------------------------|----------|
| <i>HIBADH</i>    | 3-hydroxyisobutyrate dehydrogenase mitochondrial            | 26234610 |
| <i>TARDBP</i>    | AR DNA-binding protein 43                                   | 26234610 |
| <i>hCG 17250</i> | NADH-ubiquinone oxidoreductase 75 kDa subunit               | 26234610 |
| <i>H2BFD</i>     | Histone H2B                                                 | 26234610 |
| <i>OPA1</i>      | Putative uncharacterized protein OPA1                       | 26234610 |
| <i>H2AFZ</i>     | Histone H2A Z                                               | 26234610 |
| <i>DNAJB11</i>   | APOBEC1-binding protein 2                                   | 26234610 |
| <i>OXCT</i>      | 3-oxoacid-CoA trans erase 1                                 | 26234610 |
| <i>CGI-33</i>    | H RA-interacting protein 5                                  | 26234610 |
| <i>ORCA</i>      | EB 3-associated protein o 60 kDa                            | 26234610 |
| <i>DC2</i>       | Hydrophobic protein HSF-28                                  | 26234610 |
| <i>PCK2</i>      | Phosphoenolpyruvate carboxykinase [G P mitochondrial        | 26234610 |
| <i>hBD-1</i>     | Human Beta-de ensin-1                                       | 24658581 |
| <i>CD68</i>      | CD68                                                        | 26769084 |
| <i>CD163</i>     | CD163                                                       | 26769084 |
| <i>CDH1</i>      | E-cadherin                                                  | 26769084 |
| <i>VIM</i>       | vimentin                                                    | 26769084 |
| <i>EPLIN</i>     | Epithelial protein lost in neoplasm                         | 16083295 |
| <i>PRDX2</i>     | Peroxiredoxin 2                                             | 16083295 |
| <i>MCM7</i>      | DNA replication licensing actor MCM7                        | 16083295 |
| <i>CCT8</i>      | -complex protein 1 θ subunit                                | 16083295 |
| <i>PTMA</i>      | Prothymosin α                                               | 16083295 |
| <i>DCK</i>       | Deoxycytidine kinase                                        | 16083295 |
| <i>NAP1L1</i>    | Nucleosome assembly protein 1-like 1                        | 16083295 |
| <i>ACSL4</i>     | Long-chain- atty-acid- -CoA ligase 4                        | 16083295 |
| <i>ANXA2</i>     | Annexin A2                                                  | 16083295 |
| <i>GAPDH</i>     | Glyceraldehyde-3-phosphate dehydrogenase liver              | 16083295 |
| <i>SLC3A2</i>    | 4F2 cell-sur ace antigen heavy chain                        | 16083295 |
| <i>N A</i>       | Collagen-binding protein 2 precursor                        | 16083295 |
| <i>N A</i>       | Glyceraldehyde-3-phosphate dehydrogenase muscle             | 16083295 |
| <i>RRBP1</i>     | Ribosome-binding protein 1                                  | 16083295 |
| <i>CLTC</i>      | Clathrin heavy chain 1                                      | 16083295 |
| <i>TFRC</i>      | rans erin receptor protein 1                                | 16083295 |
| <i>RBM3</i>      | Putative RNA-binding protein 3                              | 16083295 |
| <i>PLOD1</i>     | 5-dioxygenase 1 precursor                                   | 16083295 |
| <i>CALD1</i>     | Caldesmon                                                   | 16083295 |
| <i>P4HA2</i>     | Prolyl 4-hydroxylase α-2 subunit precursor                  | 16083295 |
| <i>COL1A1</i>    | Collagen α 1( ) chain precursor                             | 16083295 |
| <i>CA9</i>       | Carbonic anhydrase X precursor                              | 16083295 |
| <i>NPM1</i>      | Nucleophosmin                                               | 16083295 |
| <i>TAGLN</i>     | ransgelin                                                   | 16083295 |
| <i>CTNND1</i>    | p120 catenin                                                | 16083295 |
| <i>NEDD8</i>     | Neddylin                                                    | 16083295 |
| <i>TPI1</i>      | riosephosphate isomerase                                    | 16083295 |
| <i>CALR</i>      | Calreticulin precursor                                      | 16083295 |
| <i>TCOF1</i>     | reacle protein                                              | 16083295 |
| <i>SLC7A5</i>    | Large neutral amino acids transporter small subunit 1       | 16083295 |
| <i>TUBB4A</i>    | ubulin β-4 chain                                            | 16083295 |
| <i>CAV1</i>      | Caveolin-1                                                  | 16083295 |
| <i>EHD2</i>      | EH-domain containing protein 2                              | 16083295 |
| <i>CTNNA1</i>    | α-1 catenin                                                 | 16083295 |
| <i>ENAH</i>      | Enabled protein homolog                                     | 16083295 |
| <i>TBL2</i>      | ransducin β-like 2 protein                                  | 16083295 |
| <i>GLG1</i>      | Golgi apparatus protein 1 precursor                         | 16083295 |
| <i>KTN1</i>      | Kinectin                                                    | 16083295 |
| <i>PRDX4</i>     | Peroxiredoxin 4                                             | 16083295 |
| <i>P4HA1</i>     | Prolyl 4-hydroxylase α-1 subunit precursor                  | 16083295 |
| <i>COL5A1</i>    | Collagen α 1(V) chain precursor                             | 16083295 |
| <i>PLOD2</i>     | Procollagen-lysine 2-oxoglutarate 5-dioxygenase 2 precursor | 16083295 |
| <i>COL3A1</i>    | Collagen α 1( ) chain precursor                             | 16083295 |
| <i>ANXA6</i>     | Annexin A6                                                  | 16083295 |
| <i>CTTN</i>      | Src substrate cortactin                                     | 16083295 |
| <i>SEC61A1</i>   | Protein transport protein Sec61 α subunit iso orm 1         | 16083295 |
| <i>TPM1</i>      | ropomyosin 1 α chain                                        | 16083295 |
| <i>TPM2</i>      | ropomyosin β chain                                          | 16083295 |
| <i>PRKCA</i>     | Protein kinase C α type                                     | 16083295 |
| <i>PRKCB</i>     | Protein kinase C β type                                     | 16083295 |
| <i>KRT18</i>     | Keratin type cytoskeletal 18                                | 16083295 |
| <i>APG16L</i>    | APG16 Autophagy 16-like iso orm 3                           | 15942644 |
| <i>CAPG</i>      | Capping Protein gelsolin-like                               | 15942644 |
| <i>C15orf29</i>  | chromosome 15 open reading rame 29                          | 15942644 |
| <i>LMNA</i>      | Lamin A/C                                                   | 15942644 |
| <i>PSAT1</i>     | Phosphoserine aminotrans erase so orm 1                     | 15942644 |
| <i>SEPTIN 1</i>  | Septin 1                                                    | 15942644 |
| <i>SERPINB1</i>  | Serine protease inhibitor clade B member 1                  | 15942644 |
| <i>STMN1</i>     | Stathmin 1                                                  | 15942644 |
| <i>ZNF322A</i>   | Zinc inger protein 322A                                     | 15942644 |
| <i>ANXA1</i>     | ANNEX N A1                                                  | 15942644 |

|          |                                                 |          |
|----------|-------------------------------------------------|----------|
| CTSB     | CA HEPS N B                                     | 15942644 |
| CTSB     | CHA N B CA HEPS N B                             | 15942644 |
| ECH1     | Enoyl co enzyme a hydratae 1 peroxisomal        | 15942644 |
| FKBP9    | FK506 binding protein 9                         | 15942644 |
| HSPB1    | Heat shock 27kDA protein                        | 15942644 |
| IFNA2    | nter ero alpha 2                                | 15942644 |
| 1L1RA    | nterleukin 1 receptor antagonist                | 15942644 |
| KRT13    | Keratin 13                                      | 15942644 |
| SOD2     | Superoxide dismutase 2 mitochondrial            | 15942644 |
| OAT      | Omithine aminotras erase                        | 15942644 |
| SERPINB5 | Serine protease inhibitor clade B member 5      | 15942644 |
| ZSCAN5   | Zinc inger protein 495                          | 15942644 |
| QPCT     | Glutaminy-peptide cyclotras erase               | 25484078 |
| CXCL8    | Chemokine Ligand 8                              | 25484078 |
| LIF      | Leukemia nhibitory Factor                       | 25484078 |
| SDCBP    | Syndecan Binding Protein                        | 25484078 |
| IL1B     | nterleukin 1 beta                               | 25484078 |
| APOD     | Apolipoprotein D                                | 25484078 |
| FAM3C    | Family with sequece similarity 3 member C       | 25484078 |
| ECM1     | Extracellular Matrix Protein 1                  | 25484078 |
| DKK3     | Dickkop WN signaling pathway inhibitor 3        | 25484078 |
| ANXA1    | Annexin A1                                      | 25484078 |
| GM2A     | GM2 ganglioside activator                       | 25484078 |
| AGRN     | Agrin                                           | 25484078 |
| TIMP2    | MP metallopeptidase inhibitor 2                 | 25484078 |
| AKR1B1   | Aldo-keto reductase amily 1 member B1           | 25484078 |
| TIMP1    | MP metallopeptidase inhibitor 1                 | 25484078 |
| UBA1     | Ubiquitin-like modi ier activating enzyme 1     | 25484078 |
| ACTG1P2  | Actin-gamma 1 pseudogene 2                      | 25484078 |
| LAMB1    | Laminin beta 1                                  | 25484078 |
| CST3     | cystatin C                                      | 25484078 |
| GLCCI1   | Glucocorticoid induced trascript 1              | 25484078 |
| PRIC     | peptidylprolyd isomerase C                      | 25484078 |
| PTGR1    | Prostaglandin reductase 1                       | 25484078 |
| ANGPTL3  | Angiopoitin like 3                              | 25484078 |
| VIM      | vimentin                                        | 25484078 |
| GOT1     | Glutamic oxaloacetic trasaminase 1              | 25484078 |
| MIA      | Melanoma inhibitory activity                    | 25484078 |
| LCN2     | Lipocalin 2                                     | 25484078 |
| CYTL1    | Cytokine-like 1                                 | 25484078 |
| CXCL8    | L8                                              | 25484078 |
| ILF      | nterleukin 1 B                                  | 25484078 |
| DKK3     | Di ckkop WN signalling                          | 25484078 |
| IL-1Ba   | nterleukin 1 beta                               | 25204733 |
| IL-6     | nterleukin 6                                    | 25204733 |
| IL-8     | nterleukin 8                                    | 25204733 |
| EGFR     | epidermal growth actor receptor                 | 22902387 |
| OAT      | omithine aminotrans erase                       | 22902387 |
| TPT      | ranslationally-controlled tumor protein         | 22902387 |
| ITGA6    | ntegrin alpha-6                                 | 22902387 |
| G3BP1    | Ras G Pase-activating protein-binding protein 1 | 22902387 |
| CB39L    | Calcium-binding protein 39-like                 | 22902387 |
| MIR-19a  | microRNA 192                                    | 22902387 |
| MIR-203  | microRNA 203                                    | 22902387 |
| MIR-377  | microRNA 377                                    | 22902387 |
| CD82     | nducible membrane protein R2                    | 22902387 |
| ADRB2    | β2-Adrenergic receptor                          | 23090842 |
| HCAR1    | Nicotinic acid receptor 1                       | 23090842 |
| PTGER2   | Prostaglandin E2 receptor EP2 subtype           | 23090842 |
| F2RL1    | Proteinase-activated receptor 2 precursor       | 23090842 |
| CTNNB1   | Catenin β1                                      | 23090842 |
| CTNND1   | Catenin δ1                                      | 23090842 |
| CD44     | CD44 antigen precursor                          | 23090842 |
| ITGA3    | ntegrin α3 precursor                            | 23090842 |
| ITGA6    | ntegrin α6 precursor                            | 23090842 |
| ITGB4    | ntegrin β4 precursor                            | 23090842 |
| PKP3     | Plakophilin 3                                   | 23090842 |
| PLEC     | Plectin 1                                       | 23090842 |
| SLC12A6  | Solute carrier amily 12 member 6                | 23090842 |
| SLC38A1  | Sodium-coupled neutral amino acid transporter 1 | 23090842 |
| SLC9A1   | Sodium/hydrogen exchanger 1                     | 23090842 |
| ABCC1    | Multidrug resistance-associated protein 1       | 23090842 |
| EGFR     | Epidermal growth actor receptor precursor       | 23090842 |
| PRKD2    | Serine/threonine-protein kinase D2              | 23090842 |
| WNK1     | Serine/threonine-protein kinase Wnk1            | 23090842 |
| ADAM17   | ADAM17 precursor                                | 23090842 |
| HSPB1    | Heat shock protein β1                           | 23090842 |
| NCOA3    | Nuclear receptor coactivator 3                  | 23090842 |

|          |                                                                            |          |
|----------|----------------------------------------------------------------------------|----------|
| SHC1     | SHC-trans forming protein 1                                                | 23090842 |
| F3       | issue actor precursor                                                      | 23090842 |
| AER61    | Uncharacterized glycosyltransferase AER61 precursor                        | 23090842 |
| AGL      | Amylo-1 6-glycosyltransferase                                              | 23090842 |
| AHSA1    | Activator of 90 kDa heat shock protein A Pase homolog 1                    | 23090842 |
| ASPH     | Aspartyl/asparaginyl beta-hydroxylase                                      | 23090842 |
| ATP1A1   | Sodium/potassium-transporting A Pase subunit alpha-1 precursor             | 23090842 |
| ATP1B3   | Sodium/potassium-transporting A Pase subunit beta-3                        | 23090842 |
| ATP2B4   | Plasma membrane calcium-transporting A Pase 4                              | 23090842 |
| BTN3A3   | Butyrophilin subfamily 3 member A3 precursor/antigen                       | 23090842 |
| C3orf1   | Uncharacterized protein C3orf1 Protein M5-14                               | 23090842 |
| CAD      | CAD protein                                                                | 23090842 |
| CALR     | Calreticulin precursor                                                     | 23090842 |
| CAPN2    | Calpain-2 catalytic subunit precursor                                      | 23090842 |
| CBR4     | Carbonyl reductase 4                                                       | 23090842 |
| CCT4     | CP-1-delta                                                                 | 23090842 |
| HLA-DRB1 | HLA class II histocompatibility antigen gamma chain                        | 23090842 |
| CDC2     | Cell division control protein 2 homolog                                    | 23090842 |
| CTBS     | Di-N-acetylchitinase precursor                                             | 23090842 |
| CTNND1   | Catenin delta-1 p120 catenin                                               | 23090842 |
| DARS     | Aspartyl-tRNA synthetase cytoplasmic                                       | 23090842 |
| DDR1     | Discoidin domain receptor family member 1                                  | 23090842 |
| DHRS7B   | Dehydrogenase/reductase SDR family member 7B                               | 23090842 |
| DNAJA4   | DnaJ (Hsp40) homolog subfamily A member 4 isoform CRA b                    | 23090842 |
| HSPA4    | Heat shock 40 kDa protein 4                                                | 23090842 |
| DNAJA2   | DnaJ homolog subfamily A member 2                                          | 23090842 |
| EXT2     | Exostosin-2                                                                | 23090842 |
| FAS      | Fatty acid synthase                                                        | 23090842 |
| FAT      | Cadherin-related tumor suppressor homolog precursor Protein at homolog     | 23090842 |
| FBLN1    | Fibulin-1 precursor                                                        | 23090842 |
| FGFBP1   | Fibroblast growth factor-binding protein 1 precursor                       | 23090842 |
| GANAB    | Neutral alpha-glycosyltransferase AB precursor                             | 23090842 |
| GYS1     | Glycogen (starch) synthase muscle                                          | 23090842 |
| GDH      | Glucose 1-dehydrogenase                                                    | 23090842 |
| HAX1     | HCLS1 associated protein X-1                                               | 23090842 |
| HMGCR    | 3-hydroxy-3-methylglutaryl-coenzyme A reductase                            | 23090842 |
| HNRPF    | Heterogeneous nuclear ribonucleoprotein F                                  | 23090842 |
| HSP90AB1 | Heat shock protein HSP 90-beta                                             | 23090842 |
| HSPA1A   | Heat shock 70 kDa protein 1                                                | 23090842 |
| HSPA5    | 78 kDa glucose-regulated protein precursor                                 | 23090842 |
| IGSF3    | Uncharacterized protein IGSF3                                              | 23090842 |
| IMPAD1   | inositol monophosphatase 3                                                 | 23090842 |
| ITPR2    | inositol 1,4,5-trisphosphate receptor type 2                               | 23090842 |
| ITPR3    | inositol 1,4,5-trisphosphate receptor type 3                               | 23090842 |
| KIAA0152 | Uncharacterized protein KIAA0152 precursor                                 | 23090842 |
| KPNB1    | Importin subunit beta-1                                                    | 23090842 |
| KTEL1    | KDEL motif-containing protein 1 precursor                                  | 23090842 |
| LAMA3    | Laminin subunit alpha-3 precursor                                          | 23090842 |
| LAMA2    | Laminin subunit beta-2 precursor                                           | 23090842 |
| MAN2A1   | Alpha-mannosidase 2                                                        | 23090842 |
| MCM7     | DNA replication licensing factor MCM7                                      | 23090842 |
| NUP62    | Nuclear pore glycoprotein p62                                              | 23090842 |
| NUP88    | Nuclear pore complex protein Nup88                                         | 23090842 |
| NUP93    | Nuclear pore complex protein Nup93                                         | 23090842 |
| OAS2     | 2'-5'-oligoadenylate synthetase 2                                          | 23090842 |
| PCDH7    | Protocadherin-7 precursor                                                  | 23090842 |
| PCDHGC3  | Protocadherin gamma C3 precursor                                           | 23090842 |
| PCNA     | Proliferating cell nuclear antigen                                         | 23090842 |
| PDB1     | Pyruvate dehydrogenase E1 component subunit beta mitochondrial precursor   | 23090842 |
| PSMA3    | Proteasome subunit alpha type-3                                            | 23090842 |
| PSMC6    | 26S proteasome regulatory subunit S10B                                     | 23090842 |
| PSMD8    | 26S proteasome non-ATPase regulatory subunit 8                             | 23090842 |
| PYGB     | Glycogen phosphorylase brain form                                          | 23090842 |
| NXF1     | mRNA export factor                                                         | 23090842 |
| RARS     | Arginyl-tRNA synthetase cytoplasmic                                        | 23090842 |
| MSMO1    | C-4 methylsterol oxidase                                                   | 23090842 |
| SEPT 9   | Septin-9                                                                   | 23090842 |
| SERPINE1 | Plasminogen activator inhibitor 1 precursor                                | 23090842 |
| SLC25A5  | ADP/ATP translocase 2                                                      | 23090842 |
| SLC44A1  | Choline transporter-like protein 1                                         | 23090842 |
| STAT1    | Signal transducer and activator of transcription 1-alpha/beta              | 23090842 |
| STOM     | Erythrocyte band 7 integral membrane protein                               | 23090842 |
| TAPBP    | AP binding protein                                                         | 23090842 |
| TIMM50   | Import inner membrane translocase subunit M50 mitochondrial precursor      | 23090842 |
| TLR2     | Toll-like receptor 2 precursor                                             | 23090842 |
| TMED2    | Transmembrane emp24 domain-containing protein 2 precursor Membrane protein | 23090842 |
| TMTC3    | Transmembrane and PR repeat-containing protein 3                           | 23090842 |
| TNPO1    | Transportin-1                                                              | 23090842 |

|          |                                                                               |          |
|----------|-------------------------------------------------------------------------------|----------|
| TRIP13   | hyroid receptor-interacting protein 13                                        | 23090842 |
| TUBB     | ubulin beta chain                                                             | 23090842 |
| UB       | Ubiquitin                                                                     | 23090842 |
| UNC93B1  | Protein unc-93 homolog B1                                                     | 23090842 |
| USP9X    | Probable ubiquitin carboxyl-terminal hydrolase FAF-X                          | 23090842 |
| VDAC1    | Voltage-dependent anion-selective channel protein 1                           | 23090842 |
| VDAC2    | Voltage-dependent anion-selective channel protein 2                           | 23090842 |
| VDAC3    | Voltage-dependent anion-selective channel protein 3                           | 23090842 |
| PKD1     | Polycystic kidney disease 1-related protein                                   | 23090842 |
| XRN1     | 5'-3' exoribonuclease 1 Strand-exchange protein 1 homolog                     | 23090842 |
| MMP9     | MMP9                                                                          | 18485796 |
| MMP2     | MMP2                                                                          | 18485796 |
| SDC1     | Syndecan-1                                                                    | 23352437 |
| TGFB1    | integrin beta 1                                                               | 26850833 |
| MMP3     | matrix metalloproteinase-3                                                    | 26850833 |
| MIA      | Melanoma inhibitory activity                                                  | 18616526 |
| HMGB1    | high mobility group box-1                                                     | 18616526 |
| NFkBp65  | nuclear actor kB                                                              | 18616526 |
| VEGF     | vascular endothelial growth actor                                             | 18616526 |
| IL4RA    | nterleukin-4 receptor $\alpha$                                                | 23563734 |
| HMGB1    | High-mobility group protein B1                                                | 25828589 |
| STMN1    | Stathmin                                                                      | 24495306 |
| MYOM1    | Myomesin-1                                                                    | 24495306 |
| MATR3    | Matrin-3                                                                      | 24495306 |
| NAP1L4   | Nucleosome assembly protein 1-like 4                                          | 24495306 |
| NAP1L4b  | Nucleosome assembly protein 1-like 4                                          | 24495306 |
| LAMA3    | Laminin subunit alpha-3                                                       | 24495306 |
| PRPS2    | Ribose-phosphate pyrophosphokinase 2 Ribose-phosphate pyrophosphokina         | 24495306 |
| PRPS1L1  | Ribose-phosphate pyrophosphokinase 2 Ribose-phosphate pyrophosphokina         | 24495306 |
| PRPS1    | Ribose-phosphate pyrophosphokinase 2 Ribose-phosphate pyrophosphokina         | 24495306 |
| NAP1L1   | Nucleosome assembly protein 1-like 1                                          | 24495306 |
| SOD2     | Superoxide dismutase [Mn mitochondrial Superoxide dismutase                   | 24495306 |
| HARS     | Histidine-tRNA ligase cytoplasmic                                             | 24495306 |
| CNN3     | Calponin-3                                                                    | 24495306 |
| IDH2     | socitrate dehydrogenase [NADP mitochondrial socitrate dehydrogenase [N        | 24495306 |
| COMMD9   | COMM domain-containing protein 9                                              | 24495306 |
| DPYSL2   | Dihydropyrimidinase-related protein 2                                         | 24495306 |
| MST4     | Serine/threonine-protein kinase 24 Serine/threonine-protein kinase 24 36 kDa  | 24495306 |
| STK24    | Serine/threonine-protein kinase 24 Serine/threonine-protein kinase 24 36 kDa  | 24495306 |
| STK25    | Serine/threonine-protein kinase 24 Serine/threonine-protein kinase 24 36 kDa  | 24495306 |
| FGB      | Fibrinogen beta chain Fibrinopeptide B Fibrinogen beta chain                  | 24495306 |
| HADHB    | ri unctional enzyme subunit beta mitochondrial 3-ketoacyl-CoA thiolase        | 24495306 |
| RPS9     | 40S ribosomal protein S9                                                      | 24495306 |
| RAN      | G P-binding nuclear protein Ran                                               | 24495306 |
| ENO2     | Gamma-enolase Enolase                                                         | 24495306 |
| LUC7L2   | Putative RNA-binding protein Luc7-like 2                                      | 24495306 |
| HSPA9    | Stress-70 protein mitochondrial                                               | 24495306 |
| FHL1     | Four and a hal L M domains protein 1                                          | 24495306 |
| DECR1    | 2 4-dienoyl-CoA reductase mitochondrial                                       | 24495306 |
| PARVA    | Alpha-parvin                                                                  | 24495306 |
| PCMT1    | Protein-L-isoaspartate O-methyltrans erase Protein-L-isoaspartate(D-aspartate | 24495306 |
| PPP2R5E  | Serine/threonine-protein phosphatase 2A 56 kDa regulatory subunit epsilon is  | 24495306 |
| MYBPC1   | Myosin-binding protein C slow-type                                            | 24495306 |
| IMMT     | Mitochondrial inner membrane protein                                          | 24495306 |
| PDCD10   | Programmed cell death protein 10                                              | 24495306 |
| FGG      | Fibrinogen gamma chain                                                        | 24495306 |
| CYCS     | Cytochrome c                                                                  | 24495306 |
| RPS3A    | 40S ribosomal protein S3a                                                     | 24495306 |
| COL12A1  | Collagen alpha-1(X ) chain                                                    | 24495306 |
| TKT      | ransketolase                                                                  | 24495306 |
| NDUFB2   | NADH dehydrogenase [ubiquinone lavoprotein 2 mitochondrial                    | 24495306 |
| RPL15    | 60S ribosomal protein L15 Ribosomal protein L15                               | 24495306 |
| THBS4    | hrombospondin-4                                                               | 24495306 |
| U2SURP   | U2 snRNP-associated SURP moti -containing protein                             | 24495306 |
| SRP68    | Signal recognition particle 68 kDa protein                                    | 24495306 |
| TCOF1    | reacle protein                                                                | 24495306 |
| UGP2     | U P-glucose-1-phosphate uridylyltrans erase                                   | 24495306 |
| G6PD     | Glucose-6-phosphate 1-dehydrogenase                                           | 24495306 |
| NUCB2    | Nucleobindin-2                                                                | 24495306 |
| HYOU1    | Hypoxia up-regulated protein 1                                                | 24495306 |
| USO1     | General vesicular transport actor p115                                        | 24495306 |
| MDH1     | Malate dehydrogenase Malate dehydrogenase cytoplasmic                         | 24495306 |
| PPP1R12A | Protein phosphatase 1 regulatory subunit 12A                                  | 24495306 |
| ACADVL   | Very long-chain speci ic acyl-CoA dehydrogenase mitochondrial                 | 24495306 |
| CACNB1   | Voltage-dependent L-type calcium channel subunit beta-1                       | 24495306 |
| PGM1     | Phosphoglucomutase-1                                                          | 24495306 |
| RRBP1    | Ribosome-binding protein 1                                                    | 24495306 |
| DSC2     | Desmocollin-2                                                                 | 24495306 |

|                |                                                                                     |          |
|----------------|-------------------------------------------------------------------------------------|----------|
| DKFZp686l11137 | Desmocollin-2                                                                       | 24495306 |
| NEB            | Nebulin                                                                             | 24495306 |
| CAPRN1         | Caprin-1                                                                            | 24495306 |
| DLAT           | Dihydrolipoylysine-residue acetyltrans erase component o pyruvate dehydrog          | 24495306 |
| SLC25A11       | Mitochondrial 2-oxoglutarate/malate carrier protein                                 | 24495306 |
| DDX39A         | A P-dependent RNA helicase DDX39A                                                   | 24495306 |
| DDX39          | A P-dependent RNA helicase DDX39A                                                   | 24495306 |
| CLIC1          | Chloride intracellular channel protein 1                                            | 24495306 |
| IGF2BP3        | nsulin-like growth actor 2 mRNA-binding protein 3                                   | 24495306 |
| ATP2A1         | Sarcoplasmic/endoplasmic reticulum calcium A Pase 1                                 | 24495306 |
| IDH3B          | socitrate dehydrogenase [NAD subunit beta mitochondrial                             | 24495306 |
| KBTBD10        | Kelch repeat and B B domain-containing protein 10                                   | 24495306 |
| LDB3           | L M domain-binding protein 3                                                        | 24495306 |
| NDUFS2         | NADH dehydrogenase [ubiquinone iron-sul ur protein 2 mitochondrial                  | 24495306 |
| PDCC6          | Programmed cell death protein 6                                                     | 24495306 |
| FLNB           | Filamin-B                                                                           | 24495306 |
| SLC25A12       | Calcium-binding mitochondrial carrier protein Aralar1                               | 24495306 |
| GLS            | Glutaminase kidney iso orm mitochondrial                                            | 24495306 |
| GOT2           | Aspartate aminotrans erase mitochondrial Aspartate aminotrans erase                 | 24495306 |
| PGK1           | Phosphoglycerate kinase 1 Phosphoglycerate kinase                                   | 24495306 |
| AK1            | Adenylate kinase isoenzyme 1                                                        | 24495306 |
| OAT            | Omithine aminotrans erase mitochondrial Omithine aminotrans erase hepatic           | 24495306 |
| RPN2           | Dolichyl-diphosphooligosaccharide-protein glycosyltrans erase subunit 2             | 24495306 |
| ALDH2          | Aldehyde dehydrogenase mitochondrial                                                | 24495306 |
| SLC25A5        | ADP/A P translocase 2                                                               | 24495306 |
| P4HB           | Protein disul ide-isomerase                                                         | 24495306 |
| CTSD           | Cathepsin D Cathepsin D light chain Cathepsin D heavy chain                         | 24495306 |
| TPM2           | ropomyosin beta chain                                                               | 24495306 |
| PFKM           | 6-phospho ructokinase muscle type                                                   | 24495306 |
| TPM1           | ropomyosin alpha-1 chain                                                            | 24495306 |
| HNRNPA1        | Heterogeneous nuclear ribonucleoprotein A1 Heterogeneous nuclear ribonuc            | 24495306 |
| HNRNPA1L2      | Heterogeneous nuclear ribonucleoprotein A1 Heterogeneous nuclear ribonuc            | 24495306 |
| LAMC1          | Laminin subunit gamma-1                                                             | 24495306 |
| HSPA8          | Heat shock cognate 71 kDa protein                                                   | 24495306 |
| PDHB           | Pyruvate dehydrogenase E1 component subunit beta mitochondrial                      | 24495306 |
| PYGM           | Glycogen phosphorylase muscle orm Phosphorylase                                     | 24495306 |
| PCNA           | Proliferating cell nuclear antigen                                                  | 24495306 |
| COL6A2         | Collagen alpha-2(V ) chain                                                          | 24495306 |
| ACTN1          | Alpha-actinin-1                                                                     | 24495306 |
| MYH1           | Myosin-1                                                                            | 24495306 |
| RNH1           | Ribonuclease inhibitor                                                              | 24495306 |
| EEF2           | Elongation actor 2                                                                  | 24495306 |
| PKM2           | Pyruvate kinase isozymes M1/M2 Pyruvate kinase                                      | 24495306 |
| COX6B1         | Cytochrome c oxidase subunit 6B1                                                    | 24495306 |
| FABP4          | Fatty acid-binding protein adipocyte                                                | 24495306 |
| UCHL3          | Ubiquitin carboxyl-terminal hydrolase isozyme L3                                    | 24495306 |
| DSP            | Desmoplakin                                                                         | 24495306 |
| H2AFX          | Histone H2A x Histone H2A type 1-A Histone H2A type 2-B                             | 24495306 |
| HIST2H2AB      | Histone H2A x Histone H2A type 1-A Histone H2A type 2-B                             | 24495306 |
| HIST1H2AA      | Histone H2A x Histone H2A type 1-A Histone H2A type 2-B                             | 24495306 |
| ACADS          | Short-chain speci ic acyl-CoA dehydrogenase mitochondrial                           | 24495306 |
| ATP2A2         | Sarcoplasmic/endoplasmic reticulum calcium A Pase 2                                 | 24495306 |
| GOT1           | Aspartate aminotrans erase cytoplasmic Aspartate aminotrans erase                   | 24495306 |
| CKMT2          | Creatine kinase S-type mitochondrial                                                | 24495306 |
| UQCRC2         | Cytochrome b-c1 complex subunit 2 mitochondrial                                     | 24495306 |
| ACAT1          | Acetyl-CoA acetyltrans erase mitochondrial                                          | 24495306 |
| MYL9           | Myosin regulatory light polypeptide 9                                               | 24495306 |
| MCM3           | DNA replication licensng actor MCM3                                                 | 24495306 |
| MSN            | Moesin                                                                              | 24495306 |
| CALML3         | Calmodulin-like protein 3                                                           | 24495306 |
| APEX1          | DNA-(apurinic or apyrimidinic site) lyase DNA-(apurinic or apyrimidinic site) lyase | 24495306 |
| PSMB5          | Proteasome subunit beta type-5                                                      | 24495306 |
| NDUFS1         | NADH-ubiquinone oxidoreductase 75 kDa subunit mitochondrial                         | 24495306 |
| SERPINB3       | Serpin B3                                                                           | 24495306 |
| ERP29          | Endoplasmic reticulum resident protein 29                                           | 24495306 |
| BLVRB          | Flavin reductase (NADPH)                                                            | 24495306 |
| PRDX5          | Peroxi redoxin-5 mitochondrial                                                      | 24495306 |
| SFN            | 14-3-3 protein sigma                                                                | 24495306 |
| STIP1          | Stress-induced-phosphoprotein 1                                                     | 24495306 |
| DSG3           | Desmoglein-3                                                                        | 24495306 |
| SHMT2          | Serine hydroxymethyltrans erase mitochondrial Serine hydroxymethyltrans erase       | 24495306 |
| SPRR1A         | Cornin-A                                                                            | 24495306 |
| SPRR2A         | Small proline-rich protein 2A Small proline-rich protein 2E Small proline-rich pro  | 24495306 |
| SPRR2E         | Small proline-rich protein 2A Small proline-rich protein 2E Small proline-rich pro  | 24495306 |
| SPRR2D         | Small proline-rich protein 2A Small proline-rich protein 2E Small proline-rich pro  | 24495306 |
| SPRR2B         | Small proline-rich protein 2A Small proline-rich protein 2E Small proline-rich pro  | 24495306 |
| AGL            | Glycogen debranching enzyme 4-alpha-glucanotrans erase Amylo-alpha-1 6-g            | 24495306 |
| ACTN2          | Alpha-actinin-2                                                                     | 24495306 |



|                  |                                                                                                   |          |
|------------------|---------------------------------------------------------------------------------------------------|----------|
| <i>DLST</i>      | Dihydrolipoyllysine-residue succinyltransferase component of 2-oxoglutarate dehydrogenase complex | 24495306 |
| <i>ETFB</i>      | Electron transfer flavoprotein subunit beta                                                       | 24495306 |
| <i>EIF4A3</i>    | Eukaryotic translation initiation factor 4A-3                                                     | 24495306 |
| <i>NNMT</i>      | Nicotinamide N-methyltransferase                                                                  | 24495306 |
| <i>MDH2</i>      | Malate dehydrogenase mitochondrial Malate dehydrogenase                                           | 24495306 |
| <i>SKIV2L2</i>   | Superkiller viral inhibitory factor 2-like 2                                                      | 24495306 |
| <i>LRPPRC</i>    | Leucine-rich PPR motif-containing protein mitochondrial                                           | 24495306 |
| <i>ACAA2</i>     | 3-ketoacyl-CoA thiolase mitochondrial                                                             | 24495306 |
| <i>CCT5</i>      | Cytochrome c heme b <sub>5</sub> -complex protein 1 subunit epsilon                               | 24495306 |
| <i>TUFM</i>      | Elongation factor tu mitochondrial                                                                | 24495306 |
| <i>ALDH7A1</i>   | Alpha-aminoadipic semialdehyde dehydrogenase                                                      | 24495306 |
| <i>AARS</i>      | Alanine-tRNA ligase cytoplasmic                                                                   | 24495306 |
| <i>PSMB2</i>     | Proteasome subunit beta type-2                                                                    | 24495306 |
| <i>GMPS</i>      | GMP synthase [glutamine-hydrolyzing]                                                              | 24495306 |
| <i>IDH3A</i>     | isocitrate dehydrogenase [NADP] subunit alpha mitochondrial                                       | 24495306 |
| <i>PRELP</i>     | Prolargin                                                                                         | 24495306 |
| <i>KPNA2</i>     | Importin subunit alpha-2                                                                          | 24495306 |
| <i>HNRNPF</i>    | Heterogeneous nuclear ribonucleoprotein F Heterogeneous nuclear ribonucleoprotein                 | 24495306 |
| <i>MYOM2</i>     | Myomesin-2                                                                                        | 24495306 |
| <i>OXCT1</i>     | Succinyl-CoA 3-ketoacid-coenzyme A transferase 1 mitochondrial                                    | 24495306 |
| <i>EIF3E</i>     | Eukaryotic translation initiation factor 3 subunit E                                              | 24495306 |
| <i>HNRNPK</i>    | Heterogeneous nuclear ribonucleoprotein K                                                         | 24495306 |
| <i>PPP1CB</i>    | Serine/threonine-protein phosphatase PP1-beta catalytic subunit Serine/threonine phosphatase      | 24495306 |
| <i>SNRPD2</i>    | Small nuclear ribonucleoprotein Sm D2                                                             | 24495306 |
| <i>PSMC6</i>     | 26S proteasome regulatory subunit 10B                                                             | 24495306 |
| <i>RPS4X</i>     | 40S ribosomal protein S4 X isoform                                                                | 24495306 |
| <i>GNB2</i>      | Guanine nucleotide-binding protein G(γ)(S)/G(β) subunit beta-2 Guanine nucleotide-binding protein | 24495306 |
| <i>GNB4</i>      | Guanine nucleotide-binding protein G(γ)(S)/G(β) subunit beta-2 Guanine nucleotide-binding protein | 24495306 |
| <i>ACTG1</i>     | Actin cytoplasmic 2 Actin cytoplasmic 2 N-terminally processed                                    | 24495306 |
| <i>TPM4</i>      | Tropomyosin alpha-4 chain                                                                         | 24495306 |
| <i>RBM3</i>      | Putative RNA-binding protein 3                                                                    | 24495306 |
| <i>FABP5</i>     | Fatty acid-binding protein epidermal                                                              | 24495306 |
| <i>TAGLN</i>     | Tansgelsin                                                                                        | 24495306 |
| <i>DSG1</i>      | Desmoglein-1                                                                                      | 24495306 |
| <i>SRSF11</i>    | Serine/arginine-rich splicing factor 11                                                           | 24495306 |
| <i>SFRS11</i>    | Serine/arginine-rich splicing factor 11                                                           | 24495306 |
| <i>DHX9</i>      | Dea helicase A P-dependent RNA helicase A                                                         | 24495306 |
| <i>AHNAK</i>     | Neuroblast differentiation-associated protein AHNAK                                               | 24495306 |
| <i>FLII</i>      | Protein lightless-1 homolog                                                                       | 24495306 |
| <i>SELENBP1</i>  | Selenium-binding protein 1                                                                        | 24495306 |
| <i>CAMK2B</i>    | Calcium/calmodulin-dependent protein kinase type 2 subunit beta                                   | 24495306 |
| <i>LAMB3</i>     | Laminin subunit beta-3                                                                            | 24495306 |
| <i>PKP1</i>      | Plakophilin-1                                                                                     | 24495306 |
| <i>TUBB2A</i>    | Tubulin beta-2A chain tubulin beta-2B chain                                                       | 24495306 |
| <i>TUBB2B</i>    | Tubulin beta-2A chain tubulin beta-2B chain                                                       | 24495306 |
| <i>DPYSL3</i>    | Dihydropyrimidinase-related protein 3                                                             | 24495306 |
| <i>DSC3</i>      | Desmocollin-3                                                                                     | 24495306 |
| <i>SEC23B</i>    | Protein transport protein Sec23B                                                                  | 24495306 |
| <i>LAMA4</i>     | Laminin subunit alpha-4                                                                           | 24495306 |
| <i>FSCN1</i>     | Fascin                                                                                            | 24495306 |
| <i>ADCK3</i>     | Chaperone activity of bc1 complex-like mitochondrial                                              | 24495306 |
| <i>CABC1</i>     | Chaperone activity of bc1 complex-like mitochondrial                                              | 24495306 |
| <i>NAPRT1</i>    | Nicotinate phosphoribosyltransferase                                                              | 24495306 |
| <i>HUWE1</i>     | E3 ubiquitin-protein ligase HUWE1                                                                 | 24495306 |
| <i>ADSSL1</i>    | Adenylosuccinate synthetase isozyme 1                                                             | 24495306 |
| <i>GPDL1</i>     | Glycerol-3-phosphate dehydrogenase 1-like protein                                                 | 24495306 |
| <i>SERBP1</i>    | Plasminogen activator inhibitor 1 RNA-binding protein                                             | 24495306 |
| <i>IPO4</i>      | Importin-4                                                                                        | 24495306 |
| <i>TTN</i>       | Titin                                                                                             | 24495306 |
| <i>TNPO1</i>     | Transportin-1                                                                                     | 24495306 |
| <i>SUCLG2</i>    | Succinyl-CoA ligase [GDP-forming] subunit beta mitochondrial                                      | 24495306 |
| <i>FAM129B</i>   | Niban-like protein 1                                                                              | 24495306 |
| <i>ACO2</i>      | Aconitate hydratase mitochondrial                                                                 | 24495306 |
| <i>ASPN</i>      | Asporin                                                                                           | 24495306 |
| <i>NT5C3</i>     | Cytosolic 5-nucleotidase 3                                                                        | 24495306 |
| <i>HDHD2</i>     | Haloacid dehalogenase-like hydrolase domain-containing protein 2                                  | 24495306 |
| <i>SYNPO2L</i>   | Synaptopodin 2-like protein                                                                       | 24495306 |
| <i>NIT2</i>      | Omega-amidase N 2                                                                                 | 24495306 |
| <i>PDLIM7</i>    | PDZ and LIM domain protein 7                                                                      | 24495306 |
| <i>SAR1A</i>     | GTP-binding protein SAR1a                                                                         | 24495306 |
| <i>SAR1B</i>     | GTP-binding protein SAR1a                                                                         | 24495306 |
| <i>ABRA1</i>     | Costar family protein ABRA1                                                                       | 24495306 |
| <i>MYOT</i>      | Myotilin                                                                                          | 24495306 |
| <i>UBQLN2</i>    | Ubiquilin-2                                                                                       | 24495306 |
| <i>DBNL</i>      | Drebrin-like protein                                                                              | 24495306 |
| <i>HN1</i>       | Hematological and neurological expressed 1 protein                                                | 24495306 |
| <i>BAIAP2</i>    | Brain-specific angiogenesis inhibitor 1-associated protein 2                                      | 24495306 |
| <i>C14orf166</i> | UPF0568 protein C14orf166                                                                         | 24495306 |

|          |                                                                     |          |
|----------|---------------------------------------------------------------------|----------|
| RUVBL2   | RuvB-like 2                                                         | 24495306 |
| CFL2     | Coilin-2                                                            | 24495306 |
| YARS2    | tyrosine-tRNA ligase mitochondrial                                  | 24495306 |
| PKP3     | Plakophilin-3                                                       | 24495306 |
| AURKA    | Aurora kinase A                                                     | 23481312 |
| SERPINB1 | serine protease inhibitor clade B member 1                          | 19213596 |
| CDC23    | Cell division cycle protein 23 homolog                              | 24211406 |
| CHD8     | Chromodomain-helicase-DNA-binding protein 8                         | 24211406 |
| HIRIP3   | HIRA-interacting protein 3                                          | 24211406 |
| TMPO     | Lamina-associated polypeptide 2<comma> isoform alpha                | 24211406 |
| AHNAK    | Neuroblast differentiation-associated protein AHNAK                 | 24211406 |
| PCDH1    | Protocadherin-1                                                     | 24211406 |
| SRRM2    | Serine/arginine repetitive matrix protein 2                         | 24211406 |
| SVIL     | Supervillin                                                         | 24211406 |
| SMARCC2  | SWI/SNF complex subunit SMARCC2                                     | 24211406 |
| TSPYL2   | Testis-specific Y-encoded-like protein 2                            | 24211406 |
| TJP2     | Tight junction protein ZO-2                                         | 24211406 |
| ABCF1    | ATP-binding cassette subfamily F member 1                           | 24211406 |
| ACIN1    | Apoptotic chromatin condensation inducer in the nucleus             | 24211406 |
| AIM1L    | Absent in Melanoma 1-like protein                                   | 24211406 |
| BAG3     | BAG family molecular chaperone regulator 3                          | 24211406 |
| CBX3     | Chromobox protein homolog 3                                         | 24211406 |
| CTNNA1   | Catenin alpha-1                                                     | 24211406 |
| CTNNA2   | Catenin alpha-2                                                     | 24211406 |
| DENND1A  | DENN domain-containing protein 1A                                   | 24211406 |
| EHBP1    | EH domain-binding protein 1                                         | 24211406 |
| FAM83H   | Protein FAM83H                                                      | 24211406 |
| FOXK1    | Forkhead box protein K1                                             | 24211406 |
| IRF2BP1  | Interferon regulatory factor 2-binding protein-like                 | 24211406 |
| ITGB4    | Integrin beta-4                                                     | 24211406 |
| IWS1     | Protein IWS1 homolog                                                | 24211406 |
| MAP7D1   | MAP7 domain-containing protein 1                                    | 24211406 |
| MLLT4    | Methyltransferase 4                                                 | 24211406 |
| MYH14    | Myosin-14                                                           | 24211406 |
| NSUN2    | Nucleolar small nucleolar RNA (cytosine(34)-C(5))-methyltransferase | 24211406 |
| PHACTR4  | Phosphatase and actin regulator 4                                   | 24211406 |
| PHIP     | PH-interacting protein                                              | 24211406 |
| PRRC2B   | Protein PRRC2B                                                      | 24211406 |
| SART3    | Squamous cell carcinoma antigen recognized by cytotoxic T-cells 3   | 24211406 |
| SCRIB    | Protein scribble homolog                                            | 24211406 |
| SEN3     | Sentrin-specific protease 3                                         | 24211406 |
| SLTM     | SAFB-like transcription modulator                                   | 24211406 |
| SNIP1    | Smad nuclear-interacting protein 1                                  | 24211406 |
| SRRM2    | Serine/arginine repetitive matrix protein 2                         | 24211406 |
| TACC2    | Tubulin-binding acidic coiled-coil-containing protein 2             | 24211406 |
| TMPO     | Lamina-associated polypeptide 2<comma> isoform alpha                | 24211406 |
| TNKS1BP1 | 182 kDa tankyrase-1-binding protein                                 | 24211406 |
| ZC3H13   | Zinc finger CCCH domain-containing protein 13                       | 24211406 |
| UBE2O    | Ubiquitin-conjugating enzyme E2 O                                   | 24211406 |
| LGALS3BP | Mac-2-binding protein                                               | 18458027 |
| HSP90AA1 | Heat shock protein 90-alpha                                         | 18458027 |
| HSPA5    | BiP protein                                                         | 18458027 |
| MSN      | Moesin                                                              | 18458027 |
| PDIA3    | Disulfide-isomerase ER60                                            | 18458027 |
| HSPA8    | HSP70 family HSPA8 protein                                          | 18458027 |
| HSPA2    | HSP70-2                                                             | 18458027 |
| TGFB1    | TGF-beta-induced protein B-GH3                                      | 18458027 |
| PKM      | Pyruvate kinase isozymes M1/M2                                      | 18458027 |
| EZR      | Ezrin                                                               | 18458027 |
| FSCN1    | Fascin                                                              | 18458027 |
| ENO1     | Alpha enolase                                                       | 18458027 |
| PGK1     | Phosphoglycerate kinase 1                                           | 18458027 |
| ALDOA    | Fructose-bisphosphate aldolase A                                    | 18458027 |
| GAPDH    | Glyceraldehyde 3-phosphate dehydrogenase                            | 18458027 |
| TPM4     | Tropomyosin alpha-4 chain isoform 2                                 | 18458027 |
| SFN      | 14-3-3 protein sigma                                                | 18458027 |
| HSPB1    | Heat shock 27 kDa protein 1                                         | 18458027 |
| YWHAZ    | 14-3-3 protein zeta chain A                                         | 18458027 |
| TPI1     | Triosephosphate isomerase                                           | 18458027 |
| GSTP1    | Glutathione S-transferase P                                         | 18458027 |
| PRDX1    | Peroxiredoxin-1                                                     | 18458027 |
| NGAL     | Neutrophil gelatinase-associated lipocalin                          | 18458027 |
| NME1     | Nucleoside diphosphate kinase chain R                               | 18458027 |
| PPIA     | Peptidylprolyl isomerase A (cyclophilin A)                          | 18458027 |
| PFN1     | Profilin chain A                                                    | 18458027 |
| UBC      | Ubiquitin                                                           | 18458027 |



































































































































| Proteomics /DEG Match | DGIDb Gene Name | Interaction Claim Source        | Interaction Types          | Drug Claim Primary Name                 | PMID(s)  |
|-----------------------|-----------------|---------------------------------|----------------------------|-----------------------------------------|----------|
| ADAM17                | ADAM17          | Guide oPharmacology nteractions | inhibitor                  | K-862                                   | ---      |
|                       | ADAM17          | D                               | inhibitor                  | DPC-333                                 | ---      |
|                       | ADAM17          | Guide oPharmacology nteractions | inhibitor                  | LOMAS A                                 | ---      |
|                       | ADAM17          | Guide oPharmacology nteractions | inhibitor                  | APRA AS A                               | ---      |
|                       | ADAM17          | dgClinical rial                 | ---                        | NCB7839                                 | ---      |
|                       | ADAM17          | Guide oPharmacology nteractions | inhibitor                  | BMS-561392                              | ---      |
|                       | ADAM17          | D                               | inhibitor                  | GW-3333                                 | ---      |
| EGFR                  | EGFR            | NC                              | ---                        | E HANOL                                 | 10092515 |
|                       | EGFR            | CKB                             | ---                        | EGFRBi-armed autologous activated cells | 16397041 |
|                       | EGFR            | CKB                             | ---                        | AV-412                                  | 17888033 |
|                       | EGFR            | C ViC                           | ---                        | PF 00299804                             | 18089823 |
|                       | EGFR            | CKB                             | ---                        | AEE788                                  | 19147750 |
|                       | EGFR            | CKB                             | ---                        | CUDC-101                                | 20388807 |
|                       | EGFR            | DoCM                            | ---                        | GEF N B                                 | 21274259 |
|                       | EGFR            | CKB                             | ---                        | Gedatolisib                             | 21325073 |
|                       | EGFR            | CKB                             | ---                        | AC480                                   | 21576284 |
|                       | EGFR            | C ViC                           | ---                        | CR ZO N B                               | 21791641 |
|                       | EGFR            | OncoKB                          | ---                        | Cetuximab                               | 22001862 |
|                       | EGFR            | C ViC                           | ---                        | CARBOPLA N                              | 22139083 |
|                       | EGFR            | C ViC                           | ---                        | PACL AXEL                               | 22139083 |
|                       | EGFR            | CKB                             | ---                        | Ponatinib                               | 22238366 |
|                       | EGFR            | DoCM                            | ---                        | PAN UMUMAB                              | 22270724 |
|                       | EGFR            | CKB                             | ---                        | matinib                                 | 22323597 |
|                       | EGFR            | CKB                             | ---                        | XL647                                   | 22722787 |
|                       | EGFR            | CKB                             | ---                        | Golvatinib                              | 22789825 |
|                       | EGFR            | DoCM                            | ---                        | LAPA N B                                | 22885469 |
|                       | EGFR            | CKB                             | ---                        | GA201                                   | 23209031 |
|                       | EGFR            | CKB                             | ---                        | BMS-690514                              | 23490650 |
|                       | EGFR            | CKB                             | ---                        | Everolimus                              | 23629727 |
|                       | EGFR            | CKB                             | ---                        | Regora enib                             | 23629727 |
|                       | EGFR            | CKB                             | ---                        | Pimasertib                              | 23629727 |
|                       | EGFR            | C ViC                           | ---                        | C SPLA N                                | 23764753 |
|                       | EGFR            | CKB                             | ---                        | AK-285                                  | 23983820 |
|                       | EGFR            | CKB                             | ---                        | emsirolimus                             | 24470557 |
|                       | EGFR            | C ViC                           | ---                        | PEME REXED                              | 24636847 |
|                       | EGFR            | CKB                             | ---                        | Sirolimus                               | 24813888 |
|                       | EGFR            | CKB                             | ---                        | Decitabine                              | 24874286 |
|                       | EGFR            | CKB                             | ---                        | Paclitaxel                              | 24886365 |
|                       | EGFR            | C ViC                           | ---                        | RAPAMYC N (S ROL MUS)                   | 24934779 |
|                       | EGFR            | CKB                             | ---                        | Ganetespib                              | 25077897 |
|                       | EGFR            | CKB                             | ---                        | Nimotuzumab                             | 25185971 |
|                       | EGFR            | C ViC                           | ---                        | R NDOPEP MU                             | 25586468 |
|                       | EGFR            | CKB                             | ---                        | AUY922                                  | 25870087 |
|                       | EGFR            | CKB                             | ---                        | AB -806                                 | 25895099 |
|                       | EGFR            | CKB                             | ---                        | Vandetanib                              | 25910950 |
|                       | EGFR            | CKB                             | ---                        | AE226                                   | 26090892 |
|                       | EGFR            | CKB                             | ---                        | MK2206                                  | 26106072 |
|                       | EGFR            | CKB                             | ---                        | Sonidegib                               | 26124204 |
|                       | EGFR            | CKB                             | ---                        | PF3644022                               | 26140595 |
|                       | EGFR            | CKB                             | ---                        | PF-477736                               | 26140595 |
|                       | EGFR            | CKB                             | ---                        | BGB-283                                 | 26208524 |
|                       | EGFR            | CKB                             | ---                        | AMG 337                                 | 26432108 |
|                       | EGFR            | CKB                             | ---                        | Linsitinib                              | 26561558 |
|                       | EGFR            | CKB                             | ---                        | BMS-754807                              | 26561558 |
| EGFR                  | CKB             | ---                             | GC1118                     | 26586721                                |          |
| EGFR                  | CKB             | ---                             | EGF816                     | 26825170                                |          |
| EGFR                  | OncoKB          | ---                             | EGF816                     | 26825170                                |          |
| EGFR                  | OncoKB          | ---                             | AP32788                    | 26825170                                |          |
| EGFR                  | CKB             | ---                             | AB -414                    | 26846818                                |          |
| EGFR                  | C ViC           | ---                             | SYM004                     | 26888827                                |          |
| EGFR                  | CKB             | ---                             | AZD4547                    | 26936917                                |          |
| EGFR                  | CKB             | ---                             | Cisplatin                  | 27040853                                |          |
| EGFR                  | CKB             | ---                             | ER2                        | 27040853                                |          |
| EGFR                  | CKB             | ---                             | Sunitinib                  | 27149458                                |          |
| EGFR                  | CKB             | ---                             | K-756                      | 27196752                                |          |
| EGFR                  | CKB             | ---                             | EGFR antibody              | 27196767                                |          |
| EGFR                  | CKB             | ---                             | ERBB3 antibody             | 27196767                                |          |
| EGFR                  | CKB             | ---                             | GF-1R antibody             | 27196767                                |          |
| EGFR                  | CKB             | ---                             | unspeci ied EGFR antibody  | 27196767                                |          |
| EGFR                  | CKB             | ---                             | unspeci ied ERBB3 antibody | 27196767                                |          |
| EGFR                  | CKB             | ---                             | unspeci ied GF-1R antibody | 27196767                                |          |
| EGFR                  | CKB             | ---                             | Etoposide                  | 27216155                                |          |
| EGFR                  | CKB             | ---                             | JNJ-61186372               | 27216193                                |          |
| EGFR                  | CKB             | ---                             | Pembrolizumab              | 27225694                                |          |
| EGFR                  | CKB             | ---                             | Durvalumab                 | 27225694                                |          |
| EGFR                  | CKB             | ---                             | Atezolizumab               | 27225694                                |          |
| EGFR                  | CKB             | ---                             | EA 045                     | 27251290                                |          |

|      |        |    |                                   |                                                                                                                                                                                                                                                                                                                                                                                                                                                                        |
|------|--------|----|-----------------------------------|------------------------------------------------------------------------------------------------------------------------------------------------------------------------------------------------------------------------------------------------------------------------------------------------------------------------------------------------------------------------------------------------------------------------------------------------------------------------|
| EGFR | CKB    | -- | Amlexanox                         | 27287717                                                                                                                                                                                                                                                                                                                                                                                                                                                               |
| EGFR | CKB    | -- | Vemura enib                       | 27312529                                                                                                                                                                                                                                                                                                                                                                                                                                                               |
| EGFR | CKB    | -- | Dabra enib                        | 27312529                                                                                                                                                                                                                                                                                                                                                                                                                                                               |
| EGFR | CKB    | -- | Encora enib                       | 27312529                                                                                                                                                                                                                                                                                                                                                                                                                                                               |
| EGFR | CKB    | -- | SCH772984                         | 27312529                                                                                                                                                                                                                                                                                                                                                                                                                                                               |
| EGFR | CKB    | -- | SHP099                            | 27362227                                                                                                                                                                                                                                                                                                                                                                                                                                                               |
| EGFR | CKB    | -- | AC0010MA                          | 27573423                                                                                                                                                                                                                                                                                                                                                                                                                                                               |
| EGFR | CKB    | -- | Savolitinib                       | 27694386                                                                                                                                                                                                                                                                                                                                                                                                                                                               |
| EGFR | CKB    | -- | NG -1                             | 27694802                                                                                                                                                                                                                                                                                                                                                                                                                                                               |
| EGFR | CKB    | -- | S63845                            | 27760111                                                                                                                                                                                                                                                                                                                                                                                                                                                               |
| EGFR | CKB    | -- | PF-431396                         | 27793840                                                                                                                                                                                                                                                                                                                                                                                                                                                               |
| EGFR | CKB    | -- | PF-573228                         | 27793840                                                                                                                                                                                                                                                                                                                                                                                                                                                               |
| EGFR | CKB    | -- | cabozantinib                      | 27825638                                                                                                                                                                                                                                                                                                                                                                                                                                                               |
| EGFR | CKB    | -- | AZD3759                           | 27928026                                                                                                                                                                                                                                                                                                                                                                                                                                                               |
| EGFR | C VIC  | -- | BR GA N B PAN UMUMAB<br>CE UX MAB | 28287083                                                                                                                                                                                                                                                                                                                                                                                                                                                               |
| EGFR | CKB    | -- | JNJ-42756493                      | 28341788                                                                                                                                                                                                                                                                                                                                                                                                                                                               |
| EGFR | CKB    | -- | Bevacizumab                       | 28408243                                                                                                                                                                                                                                                                                                                                                                                                                                                               |
| EGFR | CKB    | -- | Dasatinib                         | 28416483                                                                                                                                                                                                                                                                                                                                                                                                                                                               |
| EGFR | CKB    | -- | GSK2334470                        | 28416483                                                                                                                                                                                                                                                                                                                                                                                                                                                               |
| EGFR | CKB    | -- | BKM120                            | 28416483                                                                                                                                                                                                                                                                                                                                                                                                                                                               |
| EGFR | CKB    | -- | Saracatinib                       | 28416483                                                                                                                                                                                                                                                                                                                                                                                                                                                               |
| EGFR | CKB    | -- | Bosutinib                         | 28416483                                                                                                                                                                                                                                                                                                                                                                                                                                                               |
| EGFR | CKB    | -- | PF-573328                         | 28416483                                                                                                                                                                                                                                                                                                                                                                                                                                                               |
| EGFR | CKB    | -- | AK-632                            | 28416483                                                                                                                                                                                                                                                                                                                                                                                                                                                               |
| EGFR | CKB    | -- | NC280                             | 28783719                                                                                                                                                                                                                                                                                                                                                                                                                                                               |
| EGFR | CKB    | -- | Pelitinib                         | 1 671E+15                                                                                                                                                                                                                                                                                                                                                                                                                                                              |
| EGFR | C VIC  | -- | AEE788                            | 1 82275E+15                                                                                                                                                                                                                                                                                                                                                                                                                                                            |
| EGFR | C VIC  | -- | LAPA N B                          | 1 84088E+15                                                                                                                                                                                                                                                                                                                                                                                                                                                            |
| EGFR | CG     | -- | Ge itinib                         | 2 12743E+15                                                                                                                                                                                                                                                                                                                                                                                                                                                            |
| EGFR | CKB    | -- | rintotecan                        | 2 3209E+15                                                                                                                                                                                                                                                                                                                                                                                                                                                             |
| EGFR | CKB    | -- | BEZ235                            | 2 36297E+15                                                                                                                                                                                                                                                                                                                                                                                                                                                            |
| EGFR | CKB    | -- | NPS-1034                          | 2 41652E+15                                                                                                                                                                                                                                                                                                                                                                                                                                                            |
| EGFR | C VIC  | -- | PAN UMUMAB                        | 2 46536E+15                                                                                                                                                                                                                                                                                                                                                                                                                                                            |
| EGFR | CKB    | -- | S-222611                          | 2 48373E+15                                                                                                                                                                                                                                                                                                                                                                                                                                                            |
| EGFR | CKB    | -- | Sapitinib                         | 2 48864E+15                                                                                                                                                                                                                                                                                                                                                                                                                                                            |
| EGFR | CKB    | -- | Osimertinib                       | 2 58701E+15                                                                                                                                                                                                                                                                                                                                                                                                                                                            |
| EGFR | CKB    | -- | emozolomide                       | 2 5911E+15                                                                                                                                                                                                                                                                                                                                                                                                                                                             |
| EGFR | CKB    | -- | MM-151                            | 2 59117E+15                                                                                                                                                                                                                                                                                                                                                                                                                                                            |
| EGFR | C VIC  | -- | DACOM N B                         | 2 67682E+15                                                                                                                                                                                                                                                                                                                                                                                                                                                            |
| EGFR | OncoKB | -- | Osimertinib                       | 2 71984E+15                                                                                                                                                                                                                                                                                                                                                                                                                                                            |
| EGFR | CKB    | -- | Nivolumab                         | 2 72257E+15                                                                                                                                                                                                                                                                                                                                                                                                                                                            |
| EGFR | CKB    | -- | Cabozantinib                      | 2 76944E+15                                                                                                                                                                                                                                                                                                                                                                                                                                                            |
| EGFR | CKB    | -- | AP26113                           | 2 78367E+15                                                                                                                                                                                                                                                                                                                                                                                                                                                            |
| EGFR | CKB    | -- | N/A                               | 2 83519E+15                                                                                                                                                                                                                                                                                                                                                                                                                                                            |
| EGFR | CKB    | -- | PF-05212384                       | 1 67317E+23                                                                                                                                                                                                                                                                                                                                                                                                                                                            |
| EGFR | CKB    | -- | EK -285                           | 1 70857E+23                                                                                                                                                                                                                                                                                                                                                                                                                                                            |
| EGFR | CKB    | -- | Sora enib                         | 2 36297E+23                                                                                                                                                                                                                                                                                                                                                                                                                                                            |
| EGFR | C VIC  | -- | ROC LE N B                        | 2 40657E+23                                                                                                                                                                                                                                                                                                                                                                                                                                                            |
| EGFR | CKB    | -- | PHA-665752                        | 2 41652E+23                                                                                                                                                                                                                                                                                                                                                                                                                                                            |
| EGFR | DoCM   | -- | S ROL MUS                         | 2 49348E+23                                                                                                                                                                                                                                                                                                                                                                                                                                                            |
| EGFR | CKB    | -- | Radiotherapy                      | 2 55895E+23                                                                                                                                                                                                                                                                                                                                                                                                                                                            |
| EGFR | CKB    | -- | Crizotinib                        | 2 75955E+23                                                                                                                                                                                                                                                                                                                                                                                                                                                            |
| EGFR | C VIC  | -- | EGFR NH B OR                      | 2 2056E+31                                                                                                                                                                                                                                                                                                                                                                                                                                                             |
| EGFR | CKB    | -- | WZ4002                            | 2 59643E+31                                                                                                                                                                                                                                                                                                                                                                                                                                                            |
| EGFR | CG     | -- | Cetuximab                         | 2 60594E+31                                                                                                                                                                                                                                                                                                                                                                                                                                                            |
| EGFR | CKB    | -- | Panitumumab                       | 2 68432E+31                                                                                                                                                                                                                                                                                                                                                                                                                                                            |
| EGFR | CKB    | -- | SYM004                            | 2 68888E+31                                                                                                                                                                                                                                                                                                                                                                                                                                                            |
| EGFR | CKB    | -- | Lapatinib                         | 2 75955E+31                                                                                                                                                                                                                                                                                                                                                                                                                                                            |
| EGFR | CKB    | -- | rametinib                         | 2 87837E+31                                                                                                                                                                                                                                                                                                                                                                                                                                                            |
| EGFR | CKB    | -- | Selumetinib                       | 2 49391E+39                                                                                                                                                                                                                                                                                                                                                                                                                                                            |
| EGFR | CKB    | -- | cotinib                           | 2 4533E+46                                                                                                                                                                                                                                                                                                                                                                                                                                                             |
| EGFR | OncoKB | -- | Ge itinib                         | 1 4571E+47                                                                                                                                                                                                                                                                                                                                                                                                                                                             |
| EGFR | CKB    | -- | Neratinib                         | 2 04794E+47                                                                                                                                                                                                                                                                                                                                                                                                                                                            |
| EGFR | C VIC  | -- | CE UX MAB                         | 2 46536E+55                                                                                                                                                                                                                                                                                                                                                                                                                                                            |
| EGFR | C VIC  | -- | OS MER N B                        | 2 48939E+55                                                                                                                                                                                                                                                                                                                                                                                                                                                            |
| EGFR | CKB    | -- | CO1686                            | 2 40657E+63                                                                                                                                                                                                                                                                                                                                                                                                                                                            |
| EGFR | C VIC  | -- | AFA N B                           | 2 39826E+71                                                                                                                                                                                                                                                                                                                                                                                                                                                            |
| EGFR | CKB    | -- | Dacomitinib                       | 2 48571E+71                                                                                                                                                                                                                                                                                                                                                                                                                                                            |
| EGFR | CKB    | -- | Cetuximab                         | 2 7149E+103                                                                                                                                                                                                                                                                                                                                                                                                                                                            |
| EGFR | CKB    | -- | AZD9291                           | 2 7694E+127                                                                                                                                                                                                                                                                                                                                                                                                                                                            |
| EGFR | C VIC  | -- | ERLO N B                          | 1 7878E+167                                                                                                                                                                                                                                                                                                                                                                                                                                                            |
| EGFR | C VIC  | -- | GEF N B                           | 2 35E+175                                                                                                                                                                                                                                                                                                                                                                                                                                                              |
| EGFR | OncoKB | -- | A atinib                          | 23371856 20808254 14570950 22370314 15710947 25589191 26051236 25179728 2 4893891 15638953 23969006 20573926 19692680 23328547 21764376 16187797 24 353160 22452895 24285021 23816963 23566546 23816960 22285168 15897572 186 76761 24065731 17285735 23912954 15118073 20022809 18408761 26286086 2142 2421 23749122 25521405 25130612 1867676 19536777 22190593 21949883 196257 81 16011858 15737014 21670455 26206867 21531810 18000506 24478319 1768654 7 21252719 |

|      |                                 |           |                        |                                                                                                                                                                                                                                                                                                                                                                                                                                                                                                                                                                                                                                                    |
|------|---------------------------------|-----------|------------------------|----------------------------------------------------------------------------------------------------------------------------------------------------------------------------------------------------------------------------------------------------------------------------------------------------------------------------------------------------------------------------------------------------------------------------------------------------------------------------------------------------------------------------------------------------------------------------------------------------------------------------------------------------|
| EGFR | OncoKB                          | ---       | Erlotinib              | 23371856 20808254 14570950 22370314 15710947 25589191 26051236 25179728 2 4893891 15638953 23969006 20573926 19692680 23328547 21764376 16187797 24 353160 22452895 24285021 23816963 23566546 23816960 22285168 15897572 186 76761 24065731 17285735 23912954 15118073 20022809 18408761 26286086 2142 2421 23749122 25521405 25130612 1867676 19536777 22190593 21949883 196257 81 16011858 22001862 15737014 21670455 26206867 21531810 18000506 2447831 9 17686547 21252719                                                                                                                                                                    |
| EGFR | OncoKB                          | ---       | Ge itinib              | 23371856 20808254 14570950 22370314 15710947 25589191 26051236 25179728 2 4893891 15638953 23969006 20573926 19692680 23328547 21764376 16187797 24 353160 22452895 24285021 23816963 23566546 26980463 23816960 22285168 158 97572 18676761 24065731 23912954 15118073 20022809 18408761 26286086 2142 2421 23749122 25130612 1867676 19536777 22190593 21949883 19625781 285377 64 16011858 15737014 21670455 26206867 25070024 21531810 18000506 2447831 9 17686547 21252719                                                                                                                                                                    |
| EGFR | CKB                             | ---       | Ge itinib              | 24533047 27468240 28089594 22789825 26936917 24410791 17463250 19692680 2 4165158 25964297 27196752 23980091 17085664 27793840 24353160 25573954 25 870145 24736073 22263058 18981003 17349580 26561558 26124204 23344264 209 42962 24874286 21422421 25948633 22997455 19147750 22323597 27312529 1573 7014 26206867 25931286 23542356 27612490                                                                                                                                                                                                                                                                                                   |
| EGFR | CKB                             | ---       | Erlotinib              | 26324372 25870087 27468240 28089594 27694386 27102076 27216155 23917401 2 4410791 26341921 19015641 27760111 26106072 27207775 27793840 24353160 25 573954 18981003 17349580 23344264 20942962 25077897 27825638 26286086 279 13578 22190593 26720423 19147750 24868098 28408243 26206867 25931286 2834 3545 17177598 24470557 19010870                                                                                                                                                                                                                                                                                                            |
| EGFR | DoCM                            | ---       | AFA N B                | 26619011 19455431 22452896 23102728 20068085 16707764 17653080 15710947 2 0479403 25668228 16912157 24893891 15728811 20573926 16258541 19692680 15 118125 18227510 24658966 18199554 19922469 20033049 26515464 25923549 217 83417 19692684 22753918 16187797 22452895 23945392 15329413 24636847 2381 6963 24729716 23816960 22285168 19096302 16204070 24894453 16043828 22215 752 21194487 24065731 15118073 20022809 23948351 16115929 18458038 173323 64 24623981 19147750 25157968 16011858 21430269 2302402 15737014 26720284 21670455 21233402 23242437 25923550 22588155 21531810 18303429 19671738                                      |
| EGFR | DoCM                            | ---       | ERLO N B               | 26619011 19455431 22452896 23102728 20068085 16707764 17653080 15710947 2 0479403 25668228 16912157 24893891 15728811 20573926 16258541 19692680 15 118125 18227510 24658966 18199554 19922469 20033049 26515464 25923549 217 83417 19692684 22753918 16187797 22452895 23945392 15329413 24636847 2381 6963 24729716 23816960 22285168 19096302 16204070 24894453 16043828 22215 752 21194487 24065731 15118073 20022809 23948351 16115929 18458038 173323 64 24623981 19147750 25157968 16011858 21430269 2302402 15737014 26720284 21670455 21233402 23242437 17177598 25923550 22588155 21531810 18303429 19671738                             |
| EGFR | DoCM                            | ---       | CE UX MAB              | 26619011 19455431 22452896 24934779 23102728 20068085 16707764 17653080 1 5710947 20479403 25668228 16912157 24893891 15728811 20573926 16258541 19 692680 15118125 18227510 24658966 18199554 19922469 20033049 26515464 259 23549 21783417 19692684 22753918 16187797 22452895 23945392 15329413 2463 6847 23816963 24729716 23816960 22285168 19096302 16204070 22270724 24894 453 16043828 22215752 21194487 24065731 15118073 20022809 23948351 161159 29 18458038 17332364 24623981 19147750 25157968 16011858 21430269 2357857 0 2302402 15737014 26720284 21670455 21233402 23242437 25923550 22588155 21531810 18303429 19671738 18089823 |
| EGFR | CKB                             | ---       | A atinib               | 28169392 27044931 27694386 27102076 26051236 26354527 26341921 25589492 2 7083334 25964297 28363995 27207775 28145866 24353160 25559287 25870145 24 813888 23816960 17349580 23344264 25077897 26286086 27913578 25948633 221 90593 24790411 26206867 23991291 26862733 21617858                                                                                                                                                                                                                                                                                                                                                                   |
| EGFR | ALC                             | inhibitor | AZD8931                | ---                                                                                                                                                                                                                                                                                                                                                                                                                                                                                                                                                                                                                                                |
| EGFR | Chembl nteractions              | inhibitor | ERLO N B HYDROCHLOR DE | ---                                                                                                                                                                                                                                                                                                                                                                                                                                                                                                                                                                                                                                                |
| EGFR | MyCancerGenomeClinical rial     | inhibitor | ERLO N B HYDROCHLOR DE | ---                                                                                                                                                                                                                                                                                                                                                                                                                                                                                                                                                                                                                                                |
| EGFR | Guide oPharmacology nteractions | inhibitor | PP121                  | ---                                                                                                                                                                                                                                                                                                                                                                                                                                                                                                                                                                                                                                                |
| EGFR | Guide oPharmacology nteractions | inhibitor | AFA N B                | ---                                                                                                                                                                                                                                                                                                                                                                                                                                                                                                                                                                                                                                                |
| EGFR | MyCancerGenome                  | inhibitor | AFA N B                | ---                                                                                                                                                                                                                                                                                                                                                                                                                                                                                                                                                                                                                                                |
| EGFR | MyCancerGenomeClinical rial     | inhibitor | AFA N B                | ---                                                                                                                                                                                                                                                                                                                                                                                                                                                                                                                                                                                                                                                |
| EGFR | ALC                             | inhibitor | AFA N B                | ---                                                                                                                                                                                                                                                                                                                                                                                                                                                                                                                                                                                                                                                |
| EGFR | CG                              | ---       | A atinib               | ---                                                                                                                                                                                                                                                                                                                                                                                                                                                                                                                                                                                                                                                |
| EGFR | FDA                             | ---       | A atinib               | ---                                                                                                                                                                                                                                                                                                                                                                                                                                                                                                                                                                                                                                                |
| EGFR | dgClinical rial                 | ---       | AFA N B                | ---                                                                                                                                                                                                                                                                                                                                                                                                                                                                                                                                                                                                                                                |
| EGFR | MyCancerGenomeClinical rial     | inhibitor | B BW 2992              | ---                                                                                                                                                                                                                                                                                                                                                                                                                                                                                                                                                                                                                                                |
| EGFR | D                               | inhibitor | B BW 2992              | ---                                                                                                                                                                                                                                                                                                                                                                                                                                                                                                                                                                                                                                                |
| EGFR | CancerCommons                   | inhibitor | B BW2992               | ---                                                                                                                                                                                                                                                                                                                                                                                                                                                                                                                                                                                                                                                |
| EGFR | Guide oPharmacology nteractions | ---       | BE ACELLUL N           | ---                                                                                                                                                                                                                                                                                                                                                                                                                                                                                                                                                                                                                                                |
| EGFR | Chembl nteractions              | inhibitor | LAPA N B D OSYLA E     | ---                                                                                                                                                                                                                                                                                                                                                                                                                                                                                                                                                                                                                                                |
| EGFR | MyCancerGenomeClinical rial     | inhibitor | LAPA N B D OSYLA E     | ---                                                                                                                                                                                                                                                                                                                                                                                                                                                                                                                                                                                                                                                |
| EGFR | D                               | inhibitor | YKERB                  | ---                                                                                                                                                                                                                                                                                                                                                                                                                                                                                                                                                                                                                                                |
| EGFR | CancerCommons                   | antibody  | CE UX MAB              | ---                                                                                                                                                                                                                                                                                                                                                                                                                                                                                                                                                                                                                                                |
| EGFR | Guide oPharmacology nteractions | antibody  | CE UX MAB              | ---                                                                                                                                                                                                                                                                                                                                                                                                                                                                                                                                                                                                                                                |
| EGFR | MyCancerGenome                  | antibody  | CE UX MAB              | ---                                                                                                                                                                                                                                                                                                                                                                                                                                                                                                                                                                                                                                                |
| EGFR | ALC                             | antibody  | CE UX MAB              | ---                                                                                                                                                                                                                                                                                                                                                                                                                                                                                                                                                                                                                                                |
| EGFR | D                               | antibody  | CE UX MAB              | ---                                                                                                                                                                                                                                                                                                                                                                                                                                                                                                                                                                                                                                                |
| EGFR | Chembl nteractions              | inhibitor | CE UX MAB              | ---                                                                                                                                                                                                                                                                                                                                                                                                                                                                                                                                                                                                                                                |
| EGFR | ClarityFoundationBiomarkers     | ---       | CE UX MAB              | ---                                                                                                                                                                                                                                                                                                                                                                                                                                                                                                                                                                                                                                                |
| EGFR | FDA                             | ---       | Cetuximab              | ---                                                                                                                                                                                                                                                                                                                                                                                                                                                                                                                                                                                                                                                |
| EGFR | dgClinical rial                 | ---       | CE UX MAB              | ---                                                                                                                                                                                                                                                                                                                                                                                                                                                                                                                                                                                                                                                |
| EGFR | END                             | ---       | CE UX MAB              | ---                                                                                                                                                                                                                                                                                                                                                                                                                                                                                                                                                                                                                                                |
| EGFR | END                             | ---       | RAS UZUMAB             | ---                                                                                                                                                                                                                                                                                                                                                                                                                                                                                                                                                                                                                                                |
| EGFR | ClarityFoundationBiomarkers     | ---       | PAN UMUMAB             | ---                                                                                                                                                                                                                                                                                                                                                                                                                                                                                                                                                                                                                                                |
| EGFR | dgClinical rial                 | ---       | PAN UMUMAB             | ---                                                                                                                                                                                                                                                                                                                                                                                                                                                                                                                                                                                                                                                |

EGFR

|      |                                 |            |                           |     |
|------|---------------------------------|------------|---------------------------|-----|
| EGFR | Guide oPharmacology nteractions | agonist    | PAN UMUMAB                | --- |
| EGFR | MyCancerGenome                  | antibody   | PAN UMUMAB                | --- |
| EGFR | ALC                             | antibody   | PAN UMUMAB                | --- |
| EGFR | Chembl nteractions              | inhibitor  | PAN UMUMAB                | --- |
| EGFR | CG                              | ---        | Panitumumab               | --- |
| EGFR | FDA                             | ---        | Panitumumab               | --- |
| EGFR | END                             | ---        | PAN UMUMAB                | --- |
| EGFR | D                               | ---        | PAN UMUMAB                | --- |
| EGFR | Guide oPharmacology nteractions | inhibitor  | WZ4002                    | --- |
| EGFR | D                               | inhibitor  | PAZOPAN B + YVERB/ YKERB  | --- |
| EGFR | Guide oPharmacology nteractions | ---        | EGF                       | --- |
| EGFR | D                               | inhibitor  | AK165                     | --- |
| EGFR | Chembl nteractions              | inhibitor  | AK-285                    | --- |
| EGFR | Chembl nteractions              | inhibitor  | AC-480                    | --- |
| EGFR | dgClinical rial                 | ---        | AC480                     | --- |
| EGFR | Guide oPharmacology nteractions | inhibitor  | BMS-599626                | --- |
| EGFR | MyCancerGenome                  | inhibitor  | BMS-599626                | --- |
| EGFR | ALC                             | inhibitor  | BMS-599626                | --- |
| EGFR | D                               | inhibitor  | BMS-599626                | --- |
| EGFR | Guide oPharmacology nteractions | antibody   | NEC UMUMAB                | --- |
| EGFR | MyCancerGenome                  | antibody   | NEC UMUMAB                | --- |
| EGFR | Chembl nteractions              | inhibitor  | NEC UMUMAB                | --- |
| EGFR | ALC                             | inhibitor  | NEC UMUMAB                | --- |
| EGFR | dgClinical rial                 | ---        | NEC UMUMAB                | --- |
| EGFR | Guide oPharmacology nteractions | inhibitor  | BP Q-                     | --- |
| EGFR | D                               | inhibitor  | HK -272                   | --- |
| EGFR | Chembl nteractions              | inhibitor  | NERA N B                  | --- |
| EGFR | Guide oPharmacology nteractions | inhibitor  | NERA N B                  | --- |
| EGFR | ALC                             | inhibitor  | NERA N B                  | --- |
| EGFR | dgClinical rial                 | ---        | NERA N B                  | --- |
| EGFR | Guide oPharmacology nteractions | inhibitor  | BRU N B                   | --- |
| EGFR | Guide oPharmacology nteractions | inhibitor  | COMPOUND 56 [PM D 8568816 | --- |
| EGFR | Guide oPharmacology nteractions | inhibitor  | PF-670462                 | --- |
| EGFR | Chembl nteractions              | inhibitor  | PK -166                   | --- |
| EGFR | Guide oPharmacology nteractions | inhibitor  | PK 166                    | --- |
| EGFR | Chembl nteractions              | inhibitor  | CEP-32496                 | --- |
| EGFR | Guide oPharmacology nteractions | inhibitor  | CO N B                    | --- |
| EGFR | MyCancerGenome                  | inhibitor  | CO N B                    | --- |
| EGFR | MyCancerGenomeClinical rial     | inhibitor  | CO N B                    | --- |
| EGFR | ALC                             | inhibitor  | CO N B                    | --- |
| EGFR | Chembl nteractions              | inhibitor  | VARL N B                  | --- |
| EGFR | Chembl nteractions              | inhibitor  | AFA N B D MALEA E         | --- |
| EGFR | Chembl nteractions              | inhibitor  | DACOM N B HYDRA E         | --- |
| EGFR | dgClinical rial                 | ---        | HUMAX-EGFR                | --- |
| EGFR | Chembl nteractions              | antagonist | ZALU UMUMAB               | --- |
| EGFR | ALC                             | antibody   | ZALU UMUMAB               | --- |
| EGFR | dgClinical rial                 | ---        | R NDOPEP MU               | --- |
| EGFR | Chembl nteractions              | inhibitor  | MA UZUMAB                 | --- |
| EGFR | D                               | activator  | HEGF                      | --- |
| EGFR | MyCancerGenome                  | antibody   | N MO UZUMAB               | --- |
| EGFR | ALC                             | antibody   | N MO UZUMAB               | --- |
| EGFR | CG                              | ---        | Nimotuzumab               | --- |
| EGFR | dgClinical rial                 | ---        | N MO UZUMAB               | --- |
| EGFR | MyCancerGenome                  | antibody   | SYM004                    | --- |
| EGFR | dgClinical rial                 | ---        | SYM004                    | --- |
| EGFR | MyCancerGenome                  | antibody   | RO5083945                 | --- |
| EGFR | ALC                             | antibody   | RO5083945                 | --- |
| EGFR | Chembl nteractions              | inhibitor  | mAb-425                   | --- |
| EGFR | Chembl nteractions              | ---        | MDX-447                   | --- |
| EGFR | Chembl nteractions              | antagonist | RG-7160                   | --- |
| EGFR | Chembl nteractions              | inhibitor  | DACOM N B                 | --- |
| EGFR | Guide oPharmacology nteractions | inhibitor  | DACOM N B                 | --- |
| EGFR | MyCancerGenome                  | inhibitor  | DACOM N B                 | --- |
| EGFR | MyCancerGenomeClinical rial     | inhibitor  | DACOM N B                 | --- |
| EGFR | ALC                             | inhibitor  | DACOM N B                 | --- |
| EGFR | dgClinical rial                 | ---        | DACOM N B                 | --- |
| EGFR | CancerCommons                   | inhibitor  | PF-00299804               | --- |
| EGFR | ALC                             | inhibitor  | AEE 788                   | --- |
| EGFR | Guide oPharmacology nteractions | ---        | EP REGUL N                | --- |
| EGFR | Chembl nteractions              | inhibitor  | SAP N B                   | --- |
| EGFR | Guide oPharmacology nteractions | inhibitor  | SAP N B                   | --- |



|      |                                  |           |                     |    |
|------|----------------------------------|-----------|---------------------|----|
| EGFR | ChEMBL interactions              | inhibitor | VANDE AN B          | -- |
| EGFR | Guide oPharmacology interactions | inhibitor | VANDE AN B          | -- |
| EGFR | MyCancerGenome                   | inhibitor | VANDE AN B          | -- |
| EGFR | MyCancerGenomeClinical rial      | inhibitor | VANDE AN B          | -- |
| EGFR | ALC                              | inhibitor | VANDE AN B          | -- |
| EGFR | D                                | inhibitor | VANDE AN B          | -- |
| EGFR | ClarityFoundationBiomarkers      | --        | VANDE AN B          | -- |
| EGFR | ClarityFoundationClinical rial   | --        | VANDE AN B          | -- |
| EGFR | dgClinical rial                  | --        | VANDE AN B          | -- |
| EGFR | CKB                              | --        | MGCD265             | -- |
| EGFR | ChEMBL interactions              | inhibitor | FALN DAMOL          | -- |
| EGFR | Guide oPharmacology interactions | inhibitor | FALN DAMOL          | -- |
| EGFR | Guide oPharmacology interactions | inhibitor | ORAN N B            | -- |
| EGFR | Guide oPharmacology interactions | inhibitor | PP1                 | -- |
| EGFR | ALC                              | antibody  | MEHD7945 A          | -- |
| EGFR | MyCancerGenome                   | antibody  | MEHD7945A           | -- |
| EGFR | Guide oPharmacology interactions | inhibitor | CANER N B           | -- |
| EGFR | MyCancerGenome                   | inhibitor | CANER N B           | -- |
| EGFR | ChEMBL interactions              | inhibitor | OS MER N B          | -- |
| EGFR | Guide oPharmacology interactions | inhibitor | OS MER N B          | -- |
| EGFR | MyCancerGenome                   | inhibitor | OS MER N B          | -- |
| EGFR | CG                               | --        | Osimertinib         | -- |
| EGFR | FDA                              | --        | Osimertinib         | -- |
| EGFR | ChEMBL interactions              | inhibitor | Pyrotinib           | -- |
| EGFR | ChEMBL interactions              | inhibitor | ESEVA N B           | -- |
| EGFR | Guide oPharmacology interactions | inhibitor | ESEVA N B           | -- |
| EGFR | MyCancerGenome                   | inhibitor | XL647               | -- |
| EGFR | ALC                              | inhibitor | XL647               | -- |
| EGFR | dgClinical rial                  | --        | XL647               | -- |
| EGFR | ChEMBL interactions              | inhibitor | MP-412              | -- |
| EGFR | ChEMBL interactions              | inhibitor | OS MER N B MESYLA E | -- |
| EGFR | ChEMBL interactions              | inhibitor | Puquitinib          | -- |
| EGFR | ChEMBL interactions              | inhibitor | Epitinib            | -- |
| EGFR | CKB                              | --        | Epitinib            | -- |
| EGFR | ChEMBL interactions              | inhibitor | JNJ-26483327        | -- |
| EGFR | ChEMBL interactions              | inhibitor | Pozotinib           | -- |
| EGFR | Guide oPharmacology interactions | inhibitor | POZ O N B           | -- |
| EGFR | MyCancerGenomeClinical rial      | inhibitor | POZ O N B           | -- |
| EGFR | CKB                              | --        | poziotinib          | -- |
| EGFR | ChEMBL interactions              | inhibitor | heliatinib          | -- |
| EGFR | ChEMBL interactions              | inhibitor | PD-0166285          | -- |
| EGFR | ChEMBL interactions              | inhibitor | S-222611            | -- |
| EGFR | D                                | inhibitor | S-222611            | -- |
| EGFR | ChEMBL interactions              | inhibitor | EGF816              | -- |
| EGFR | ChEMBL interactions              | inhibitor | Simotinib           | -- |
| EGFR | ChEMBL interactions              | inhibitor | Allitinib           | -- |
| EGFR | Guide oPharmacology interactions | inhibitor | BGB-283             | -- |
| EGFR | ALC                              | inhibitor | CO 1686             | -- |
| EGFR | MyCancerGenome                   | inhibitor | CO-1686             | -- |
| EGFR | ChEMBL interactions              | inhibitor | ROC LE N B          | -- |
| EGFR | Guide oPharmacology interactions | inhibitor | ROC LE N B          | -- |
| EGFR | CG                               | --        | Rociletinib         | -- |
| EGFR | MyCancerGenomeClinical rial      | inhibitor | AP26113             | -- |
| EGFR | ALC                              | inhibitor | AP26113             | -- |
| EGFR | ChEMBL interactions              | inhibitor | BR GA N B           | -- |
| EGFR | Guide oPharmacology interactions | inhibitor | BR GA N B           | -- |
| EGFR | ChEMBL interactions              | inhibitor | BMS-690514          | -- |
| EGFR | Guide oPharmacology interactions | inhibitor | BMS-690514          | -- |
| EGFR | MyCancerGenome                   | inhibitor | BMS-690514          | -- |
| EGFR | ALC                              | inhibitor | BMS-690514          | -- |
| EGFR | ChEMBL interactions              | inhibitor | HM-61713            | -- |
| EGFR | CKB                              | --        | ASP8273             | -- |
| EGFR | Guide oPharmacology interactions | inhibitor | NAQUO N B           | -- |
| EGFR | MyCancerGenome                   | antibody  | AB -806             | -- |
| EGFR | Guide oPharmacology interactions | inhibitor | ACALABRU N B        | -- |
| EGFR | CG                               | --        | HM61713             | -- |
| EGFR | CKB                              | --        | HM61713             | -- |
| EGFR | Guide oPharmacology interactions | inhibitor | OLMU N B            | -- |
| EGFR | Guide oPharmacology interactions | inhibitor | EGFR NH B OR        | -- |
| EGFR | CG                               | --        | Sirolimus           | -- |
| EGFR | ChEMBL interactions              | inhibitor | AZD-4769            | -- |

|      |                                 |           |                            |    |
|------|---------------------------------|-----------|----------------------------|----|
| EGFR | D                               | inhibitor | AZD4769                    | -- |
| EGFR | Guide oPharmacology nteractions | inhibitor | DOV N B                    | -- |
| EGFR | Guide oPharmacology nteractions | inhibitor | PD 158780                  | -- |
| EGFR | ChEMBL nteractions              | inhibitor | CANER N B D HYDROCHLOR DE  | -- |
| EGFR | CancerCommons                   | inhibitor | ERLO N B                   | -- |
| EGFR | Guide oPharmacology nteractions | inhibitor | ERLO N B                   | -- |
| EGFR | MyCancerGenome                  | inhibitor | ERLO N B                   | -- |
| EGFR | ALC                             | inhibitor | ERLO N B                   | -- |
| EGFR | D                               | inhibitor | ERLO N B                   | -- |
| EGFR | CG                              | --        | Erlotinib                  | -- |
| EGFR | ClarityFoundationBiomarkers     | --        | ERLO N B                   | -- |
| EGFR | ClarityFoundationClinical rial  | --        | ERLO N B                   | -- |
| EGFR | FDA                             | --        | Erlotinib                  | -- |
| EGFR | dgClinical rial                 | --        | ERLO N B                   | -- |
| EGFR | END                             | --        | ERLO N B                   | -- |
| EGFR | ClarityFoundationClinical rial  | --        | LAPA N B                   | -- |
| EGFR | CancerCommons                   | inhibitor | LAPA N B                   | -- |
| EGFR | Guide oPharmacology nteractions | inhibitor | LAPA N B                   | -- |
| EGFR | ALC                             | inhibitor | LAPA N B                   | -- |
| EGFR | D                               | inhibitor | LAPA N B                   | -- |
| EGFR | CG                              | --        | Lapatinib                  | -- |
| EGFR | dgClinical rial                 | --        | LAPA N B                   | -- |
| EGFR | END                             | --        | LAPA N B                   | -- |
| EGFR | Guide oPharmacology nteractions | inhibitor | AG 490                     | -- |
| EGFR | ChEMBL nteractions              | inhibitor | AEE-788                    | -- |
| EGFR | Guide oPharmacology nteractions | inhibitor | AEE788                     | -- |
| EGFR | MyCancerGenome                  | inhibitor | AEE788                     | -- |
| EGFR | ChEMBL nteractions              | inhibitor | CUDC-101                   | -- |
| EGFR | Guide oPharmacology nteractions | inhibitor | CUDC-101                   | -- |
| EGFR | ALC                             | inhibitor | CUDC-101                   | -- |
| EGFR | dgClinical rial                 | --        | CUDC-101                   | -- |
| EGFR | ChEMBL nteractions              | inhibitor | PEL N B                    | -- |
| EGFR | Guide oPharmacology nteractions | inhibitor | PEL N B                    | -- |
| EGFR | MyCancerGenome                  | inhibitor | PEL N B                    | -- |
| EGFR | ALC                             | inhibitor | PEL N B                    | -- |
| EGFR | D                               | activator | DWP-401                    | -- |
| EGFR | dgClinical rial                 | --        | L DOCA NE                  | -- |
| EGFR | Guide oPharmacology nteractions | inhibitor | AG1478                     | -- |
| EGFR | ChEMBL nteractions              | inhibitor | GEF N B                    | -- |
| EGFR | Guide oPharmacology nteractions | inhibitor | GEF N B                    | -- |
| EGFR | MyCancerGenome                  | inhibitor | GEF N B                    | -- |
| EGFR | MyCancerGenomeClinical rial     | inhibitor | GEF N B                    | -- |
| EGFR | D                               | inhibitor | GEF N B                    | -- |
| EGFR | ClarityFoundationBiomarkers     | --        | GEF N B                    | -- |
| EGFR | FDA                             | --        | Ge itinib                  | -- |
| EGFR | dgClinical rial                 | --        | GEF N B                    | -- |
| EGFR | END                             | --        | GEF N B                    | -- |
| EGFR | ALC                             | inhibitor | GEF N B RESSA              | -- |
| EGFR | CancerCommons                   | inhibitor | GELF N B                   | -- |
| EGFR | CKB                             | --        | ABBV-221                   | -- |
| EGFR | CKB                             | --        | AFM24                      | -- |
| EGFR | Guide oPharmacology nteractions | inhibitor | AG 112                     | -- |
| EGFR | Guide oPharmacology nteractions | inhibitor | AG 9                       | -- |
| EGFR | ClarityFoundationClinical rial  | --        | AKOS004227608              | -- |
| EGFR | dgClinical rial                 | --        | AL -110                    | -- |
| EGFR | Guide oPharmacology nteractions | --        | AMPH REGUL N               | -- |
| EGFR | D                               | antibody  | AN -HER3/EGFR DAF          | -- |
| EGFR | CKB                             | --        | AP32788                    | -- |
| EGFR | dgClinical rial                 | --        | ARRY-334543                | -- |
| EGFR | dgClinical rial                 | --        | AV-412                     | -- |
| EGFR | CKB                             | --        | AV D100                    | -- |
| EGFR | MyCancerGenome                  | inhibitor | AZD8931                    | -- |
| EGFR | D                               | inhibitor | BEVAC ZUMAB+ERLO N B       | -- |
| EGFR | D                               | inhibitor | C -1033                    | -- |
| EGFR | Guide oPharmacology nteractions | inhibitor | COMPOUND 38 [PM D 24915291 | -- |
| EGFR | CKB                             | --        | DS-1205b                   | -- |
| EGFR | Guide oPharmacology nteractions | inhibitor | EGFR/ERBB-2 NH B OR        | -- |
| EGFR | Guide oPharmacology nteractions | inhibitor | EGFR/ERBB-2/ERBB-4 NH B OR | -- |
| EGFR | Guide oPharmacology nteractions | --        | EP GEN                     | -- |
| EGFR | D                               | inhibitor | ERLO N B+BEVAC ZUMAB       | -- |

|       |       |                                 |               |                                             |          |
|-------|-------|---------------------------------|---------------|---------------------------------------------|----------|
|       | EGFR  | Guide oPharmacology nteractions | ---           | HB-EGF                                      | ---      |
|       | EGFR  | Guide oPharmacology nteractions | inhibitor     | JAK3 NH B OR                                | ---      |
|       | EGFR  | dgClinical rial                 | ---           | MDX-214                                     | ---      |
|       | EGFR  | Guide oPharmacology nteractions | antibody      | MM-151                                      | ---      |
|       | EGFR  | MyCancerGenome                  | antibody      | MM-151                                      | ---      |
|       | EGFR  | ALC                             | antibody      | MM151                                       | ---      |
|       | EGFR  | Guide oPharmacology nteractions | inhibitor     | NAZAR N B                                   | ---      |
|       | EGFR  | Guide oPharmacology nteractions | inhibitor     | PD 174265                                   | ---      |
|       | EGFR  | Guide oPharmacology nteractions | inhibitor     | PD166285                                    | ---      |
|       | EGFR  | D                               | inhibitor     | PF-299804                                   | ---      |
|       | EGFR  | Guide oPharmacology nteractions | inhibitor     | ARLOXO N B                                  | ---      |
|       | EGFR  | Guide oPharmacology nteractions | ---           | GF0E±                                       | ---      |
|       | EGFR  | CKB                             | ---           | H-4000                                      | ---      |
|       | EGFR  | D                               | inhibitor     | YVERB/ YKERB                                | ---      |
|       | EGFR  | D                               | inhibitor     | XL647                                       | ---      |
|       | EGFR  | Guide oPharmacology nteractions | inhibitor     | ZM-306416                                   | ---      |
|       | F2RL1 | NC                              | ---           | MACROL DES                                  | 18212111 |
|       | F2RL1 | Guide oPharmacology nteractions | agonist       | RANS-C NNAMOYL-L GRLO [N-[3H PROP ONYL -NH2 | ---      |
|       | F2RL1 | Guide oPharmacology nteractions | agonist       | AC-55541                                    | ---      |
|       | F2RL1 | Guide oPharmacology nteractions | agonist       | AC-98170                                    | ---      |
|       | F2RL1 | Guide oPharmacology nteractions | agonist       | 2-FUROYL-L GRLO-AM DE                       | ---      |
|       | F2RL1 | Guide oPharmacology nteractions | agonist       | GB110                                       | ---      |
|       | F2RL1 | Guide oPharmacology nteractions | agonist       | AC264613                                    | ---      |
|       | F2RL1 | Guide oPharmacology nteractions | agonist       | [3H 2-FUROYL-L GRL-NH2                      | ---      |
|       | F2RL1 | Guide oPharmacology nteractions | agonist       | 2-FUROYL-L GRL[N-(ALEXA FLUOR 594)-O -NH2   | ---      |
| F2RL1 | F2RL1 | Guide oPharmacology nteractions | agonist       | 2-FUROYL-L GRL[N[3H PROP ONYL -O-NH2        | ---      |
|       | F2RL1 | Guide oPharmacology nteractions | agonist       | AY77                                        | ---      |
|       | F2RL1 | Guide oPharmacology nteractions | allosteric mo | AZ3451                                      | ---      |
|       | F2RL1 | Guide oPharmacology nteractions | antagonist    | AZ7188                                      | ---      |
|       | F2RL1 | Guide oPharmacology nteractions | antagonist    | AZ8838                                      | ---      |
|       | F2RL1 | Guide oPharmacology nteractions | antagonist    | C391                                        | ---      |
|       | F2RL1 | Guide oPharmacology nteractions | antagonist    | GB88                                        | ---      |
|       | F2RL1 | Guide oPharmacology nteractions | antagonist    | P2PAL18S                                    | ---      |
|       | F2RL1 | Guide oPharmacology nteractions | agonist       | SL GKV-NH2                                  | ---      |
|       | F2RL1 | Guide oPharmacology nteractions | agonist       | SL GRL-NH2                                  | ---      |
| ITGA3 | ITGA3 | Guide oPharmacology nteractions | ---           | PEP DE L GAND 2 [PM D 19055415              | ---      |
|       | ITGB1 | Guide oPharmacology nteractions | antibody      | NA AL ZUMAB                                 | ---      |
|       | ITGB1 | Chembl nteractions              | inhibitor     | NA AL ZUMAB                                 | ---      |
|       | ITGB1 | ALC                             | antibody      | V AX N                                      | ---      |
|       | ITGB1 | Chembl nteractions              | antagonist    | N E UMUMAB                                  | ---      |
|       | ITGB1 | dgClinical rial                 | ---           | R1295                                       | ---      |
|       | ITGB1 | Chembl nteractions              | antagonist    | F RA EGRAS                                  | ---      |
|       | ITGB1 | dgClinical rial                 | ---           | F RA EGRAS                                  | ---      |
|       | ITGB1 | dgClinical rial                 | ---           | AN HYMOCY E GLOBUL N                        | ---      |
|       | ITGB1 | D                               | antagonist    | R411                                        | ---      |
|       | ITGB1 | Chembl nteractions              | antagonist    | VOLOC X MAB                                 | ---      |
|       | ITGB1 | ALC                             | antibody      | VOLOC X MAB                                 | ---      |
|       | ITGB1 | dgClinical rial                 | ---           | VOLOC X MAB                                 | ---      |
| ITGB1 | ITGB1 | Chembl nteractions              | inhibitor     | D 17E6                                      | ---      |
|       | ITGB1 | ALC                             | antibody      | PF-04605412                                 | ---      |
|       | ITGB1 | Guide oPharmacology nteractions | inhibitor     | B O1211                                     | ---      |
|       | ITGB1 | dgClinical rial                 | ---           | A L1102                                     | ---      |
|       | ITGB1 | dgClinical rial                 | ---           | F200                                        | ---      |
|       | ITGB1 | dgClinical rial                 | ---           | GLPG0187                                    | ---      |
|       | ITGB1 | D                               | antagonist    | JSM 6427                                    | ---      |
|       | ITGB1 | dgClinical rial                 | ---           | JSM 6427                                    | ---      |
|       | ITGB1 | Guide oPharmacology nteractions | inhibitor     | OB US A N                                   | ---      |
|       | ITGB1 | dgClinical rial                 | ---           | SAN-300                                     | ---      |

|       |                                 |                                 |                                 |                            |             |
|-------|---------------------------------|---------------------------------|---------------------------------|----------------------------|-------------|
|       | ITGB1                           | Guide oPharmacology nteractions | inhibitor                       | C 15                       | ---         |
|       | ITGB1                           | Guide oPharmacology nteractions | inhibitor                       | CS2314                     | ---         |
| KRT19 | KRT19                           | NC                              | ---                             | PD-98059                   | 15793288    |
|       | KRT19                           | NC                              | ---                             | DEXAME HASONE              | 15793288    |
| LAMB1 | LAMB1                           | NC                              | ---                             | HEPARAN SULFA E            | 8873769     |
|       | LAMB1                           | Chembl nteractions              | ---                             | OCR PLASM N                | ---         |
| LIF   | LIF                             | NC                              | ---                             | L-1                        | 1908322     |
|       | LIF                             | NC                              | ---                             | RE NO C AC D               | 2119291     |
|       | LIF                             | NC                              | ---                             | HROMB N                    | 7007650     |
|       | LIF                             | NC                              | ---                             | DEXAME HASONE              | 8392465     |
|       | LIF                             | NC                              | ---                             | CAPSA C N                  | 9138695     |
|       | LIF                             | NC                              | ---                             | OES RAD OL                 | 10508216    |
|       | LIF                             | NC                              | ---                             | DA DZE N                   | 10508216    |
|       | LIF                             | NC                              | ---                             | M FEPR S ONE               | 10717784    |
|       | LIF                             | NC                              | ---                             | BUP VACA NE                | 10838161    |
|       | LIF                             | NC                              | ---                             | AN SENSE OL GONUCLEO DES   | 10843995    |
|       | LIF                             | NC                              | ---                             | HORMONES                   | 11589623    |
|       | LIF                             | NC                              | ---                             | PACL AXEL                  | 11800022    |
|       | LIF                             | NC                              | ---                             | CLOM PHENE C RA E          | 12012626    |
|       | LIF                             | NC                              | ---                             | AZACY D NE                 | 12543079    |
|       | LIF                             | NC                              | ---                             | L-13                       | 12620497    |
|       | LIF                             | NC                              | ---                             | 5-AZA-2&APOS -DEOXYCY D NE | 14647063    |
|       | LIF                             | NC                              | ---                             | S MVAS A N                 | 16797728    |
| LIF   | NC                              | ---                             | HUMAN CHOR ON C<br>GONADO ROP N | 9 76435E+14                |             |
| LIF   | NC                              | ---                             | C SPLA N                        | 1 18E+15                   |             |
| PLAU  | PLAU                            | NC                              | ---                             | RE NOL                     | 1576255     |
|       | PLAU                            | NC                              | ---                             | ONOMYC N                   | 1701176     |
|       | PLAU                            | NC                              | ---                             | COR SOL                    | 2115769     |
|       | PLAU                            | NC                              | ---                             | NORD HYDROGUA ARE C AC D   | 2122915     |
|       | PLAU                            | NC                              | ---                             | DEX RAN SULFA E            | 2465792     |
|       | PLAU                            | NC                              | ---                             | 17 BE A-ES RAD OL          | 2492346     |
|       | PLAU                            | NC                              | ---                             | PHOSPHOD ES ERASE NH B OR  | 3021458     |
|       | PLAU                            | NC                              | ---                             | CALC R OL                  | 3139763     |
|       | PLAU                            | NC                              | ---                             | PRO E N K NASE C NH B OR   | 7684044     |
|       | PLAU                            | NC                              | ---                             | L F                        | 7782459     |
|       | PLAU                            | NC                              | ---                             | D FFEREN A ON NDU CER      | 8595156     |
|       | PLAU                            | NC                              | ---                             | BCNU                       | 9219734     |
|       | PLAU                            | NC                              | ---                             | C SPLA N                   | 9219734     |
|       | PLAU                            | NC                              | ---                             | RAZOXANE                   | 9378540     |
|       | PLAU                            | NC                              | ---                             | DACARBAZ NE                | 9378540     |
|       | PLAU                            | NC                              | ---                             | AN OX DAN                  | 9573532     |
|       | PLAU                            | NC                              | ---                             | VERAPAM L                  | 9579573     |
|       | PLAU                            | NC                              | ---                             | PRO E N K NASE NH B OR     | 9579573     |
|       | PLAU                            | NC                              | ---                             | OES RAD OL                 | 9662256     |
|       | PLAU                            | NC                              | ---                             | AZACY D NE                 | 10209960    |
|       | PLAU                            | NC                              | ---                             | RAN ES                     | 10559777    |
|       | PLAU                            | NC                              | ---                             | RAPAMYC N                  | 11245436    |
|       | PLAU                            | NC                              | ---                             | HERB MYC N A               | 11245436    |
|       | PLAU                            | NC                              | ---                             | YROS NE K NASE NH B OR     | 11245436    |
|       | PLAU                            | NC                              | ---                             | RU 486                     | 11742418    |
|       | PLAU                            | NC                              | ---                             | B SPHOSPHONA ES            | 11984068    |
|       | PLAU                            | NC                              | ---                             | ALENDRONA E                | 11984068    |
|       | PLAU                            | NC                              | ---                             | ZOLEDRONA E                | 11984068    |
|       | PLAU                            | NC                              | ---                             | CLODRONA E                 | 11984068    |
|       | PLAU                            | NC                              | ---                             | R CHOS A N A               | 12198113    |
|       | PLAU                            | NC                              | ---                             | AN NFLAMMA ORY DRUGS       | 12234061    |
|       | PLAU                            | NC                              | ---                             | GELDANAMYC N               | 12724357    |
|       | PLAU                            | NC                              | ---                             | AN B O C                   | 12724357    |
|       | PLAU                            | NC                              | ---                             | PAPAVER NE                 | 16099300    |
|       | PLAU                            | NC                              | ---                             | CELECOX B                  | 16172791    |
|       | PLAU                            | NC                              | ---                             | BLM                        | 16224526    |
|       | PLAU                            | NC                              | ---                             | RESSA                      | 16263158    |
|       | PLAU                            | NC                              | ---                             | G-CSF                      | 16331631    |
|       | PLAU                            | NC                              | ---                             | PMSG                       | 2 50665E+13 |
|       | PLAU                            | Guide oPharmacology nteractions | inhibitor                       | WX-UK1                     | ---         |
| PLAU  | dgClinical rial                 | ---                             | WX-UK1                          | ---                        |             |
| PLAU  | Guide oPharmacology nteractions | inhibitor                       | UK-356202                       | ---                        |             |
| PLAU  | dgClinical rial                 | ---                             | UROK NASE                       | ---                        |             |
| PLAU  | D                               | activator                       | AMED PLASE                      | ---                        |             |
| PLAU  | Guide oPharmacology nteractions | inhibitor                       | COMPOUND 4 [PM D 18163548       | ---                        |             |
| PLAU  | dgClinical rial                 | ---                             | MRX-801                         | ---                        |             |
| PLAU  | Guide oPharmacology nteractions | inhibitor                       | UPAMOS A                        | ---                        |             |
| PLAU  | dgClinical rial                 | ---                             | WX-671                          | ---                        |             |
| PSMA3 | PSMA3                           | Chembl nteractions              | inhibitor                       | OPROZOM B                  | ---         |
|       | PSMA3                           | Chembl nteractions              | inhibitor                       | BOR EZOM B                 | ---         |
|       | PSMA3                           | MyCancerGenome                  | inhibitor                       | BOR EZOM B                 | ---         |
|       | PSMA3                           | Chembl nteractions              | inhibitor                       | XAZOM B C RA E             | ---         |

|       |       |                                 |           |                           |    |
|-------|-------|---------------------------------|-----------|---------------------------|----|
|       | PSMA3 | ChEMBL interactions             | inhibitor | MAR ZOM B                 | -- |
|       | PSMA3 | ChEMBL interactions             | inhibitor | CARF LZOM B               | -- |
|       | PSMA3 | MyCancerGenome                  | inhibitor | CARF LZOM B               | -- |
| PSMC6 | PSMC6 | ChEMBL interactions             | inhibitor | OPROZOM B                 | -- |
|       | PSMC6 | ChEMBL interactions             | inhibitor | BOR EZOM B                | -- |
|       | PSMC6 | MyCancerGenome                  | inhibitor | BOR EZOM B                | -- |
|       | PSMC6 | ChEMBL interactions             | inhibitor | XAZOM B C RA E            | -- |
|       | PSMC6 | ChEMBL interactions             | inhibitor | CARF LZOM B               | -- |
|       | PSMC6 | MyCancerGenome                  | inhibitor | CARF LZOM B               | -- |
| PYGB  | PYGB  | D                               | inhibitor | PSN357                    | -- |
|       | PYGB  | dgClinical rial                 | --        | PSN357                    | -- |
| TUBB  | TUBB  | ChEMBL interactions             | inhibitor | COLCH C NE                | -- |
|       | TUBB  | Guide oPharmacology nteractions | inhibitor | COLCH C NE                | -- |
|       | TUBB  | ChEMBL interactions             | inhibitor | PL NABUL N                | -- |
|       | TUBB  | ChEMBL interactions             | inhibitor | CABAZ AXEL                | -- |
|       | TUBB  | Guide oPharmacology nteractions | inhibitor | CABAZ AXEL                | -- |
|       | TUBB  | ChEMBL interactions             | inhibitor | XABEP LONE                | -- |
|       | TUBB  | Guide oPharmacology nteractions | inhibitor | XABEP LONE                | -- |
|       | TUBB  | Guide oPharmacology nteractions | inhibitor | V NBLAS NE                | -- |
|       | TUBB  | ChEMBL interactions             | inhibitor | ER BUL N MESYLA E         | -- |
|       | TUBB  | Guide oPharmacology nteractions | inhibitor | ER BUL N                  | -- |
|       | TUBB  | ChEMBL interactions             | inhibitor | BREN UX MAB VEDO N        | -- |
|       | TUBB  | ChEMBL interactions             | inhibitor | RAS UZUMAB EM ANS NE      | -- |
|       | TUBB  | ChEMBL interactions             | --        | DAVUNE DE                 | -- |
|       | TUBB  | ChEMBL interactions             | inhibitor | CROL BUL N                | -- |
|       | TUBB  | ChEMBL interactions             | --        | FOSBRE ABUL N ROME HAM NE | -- |
|       | TUBB  | ChEMBL interactions             | --        | PACL AXEL POL GLUMEX      | -- |
|       | TUBB  | ChEMBL interactions             | inhibitor | V NFLUN NE                | -- |
|       | TUBB  | ChEMBL interactions             | --        | SAGOP LONE                | -- |
|       | TUBB  | ChEMBL interactions             | inhibitor | FOSBRE ABUL N D SOD UM    | -- |
|       | TUBB  | ChEMBL interactions             | inhibitor | DOCE AXEL HYDRA E         | -- |
|       | TUBB  | ChEMBL interactions             | inhibitor | V NBLAS NE SULFA E        | -- |
|       | TUBB  | ChEMBL interactions             | inhibitor | PACL AXEL                 | -- |
|       | TUBB  | Guide oPharmacology nteractions | inhibitor | PACL AXEL                 | -- |
|       | TUBB  | ChEMBL interactions             | --        | VERUBUL N                 | -- |
|       | TUBB  | ChEMBL interactions             | inhibitor | ND BUL N                  | -- |
|       | TUBB  | ChEMBL interactions             | inhibitor | V NCR S NE SULFA E        | -- |
|       | TUBB  | ChEMBL interactions             | inhibitor | V NORELB N D AR RA E      | -- |
|       | TUBB  | ChEMBL interactions             | inhibitor | LEX BUL N                 | -- |
|       | TUBB  | Guide oPharmacology nteractions | inhibitor | V NCR S NE                | -- |
|       | TUBB  | Guide oPharmacology nteractions | inhibitor | DOCE AXEL                 | -- |

| Gene Ontology ID | Term                                                           | Ont | N    | DE   | P.DE       |
|------------------|----------------------------------------------------------------|-----|------|------|------------|
| GO 0008150       | biological process                                             | BP  | 9721 | 1610 | 4.92E-07   |
| GO 0009987       | cellular process                                               | BP  | 9039 | 1512 | 7.49E-07   |
| GO 0008152       | metabolic process                                              | BP  | 7168 | 1187 | 0.00961494 |
| GO 0065007       | biological regulation                                          | BP  | 6726 | 1173 | 4.65E-08   |
| GO 0071704       | organic substance metabolic process                            | BP  | 6867 | 1147 | 0.00310563 |
| GO 0044237       | cellular metabolic process                                     | BP  | 6810 | 1131 | 0.00924209 |
| GO 0044238       | primary metabolic process                                      | BP  | 6647 | 1116 | 0.00170217 |
| GO 0050789       | regulation of biological process                               | BP  | 6363 | 1114 | 9.88E-08   |
| GO 0006807       | nitrogen compound metabolic process                            | BP  | 6403 | 1083 | 0.00064792 |
| GO 0050794       | regulation of cellular process                                 | BP  | 5986 | 1057 | 5.39E-08   |
| GO 0043170       | macromolecule metabolic process                                | BP  | 5920 | 1015 | 0.00012943 |
| GO 0044260       | cellular macromolecule metabolic process                       | BP  | 5276 | 921  | 2.12E-05   |
| GO 0050896       | response to stimulus                                           | BP  | 4838 | 825  | 0.00298664 |
| GO 0071840       | cellular component organization or biogenesis                  | BP  | 4312 | 773  | 3.73E-06   |
| GO 0016043       | cellular component organization                                | BP  | 4153 | 751  | 1.39E-06   |
| GO 0034641       | cellular nitrogen compound metabolic process                   | BP  | 4345 | 749  | 0.00170027 |
| GO 0019222       | regulation of metabolic process                                | BP  | 4152 | 736  | 4.83E-05   |
| GO 1901564       | organonitrogen compound metabolic process                      | BP  | 4384 | 735  | 0.03176763 |
| GO 1901360       | organic cyclic compound metabolic process                      | BP  | 4102 | 711  | 0.00134939 |
| GO 0006725       | cellular aromatic compound metabolic process                   | BP  | 3989 | 697  | 0.00061297 |
| GO 0051716       | cellular response to stimulus                                  | BP  | 4027 | 692  | 0.00421834 |
| GO 0031323       | regulation of cellular metabolic process                       | BP  | 3824 | 691  | 6.54E-06   |
| GO 0046483       | heterocycle metabolic process                                  | BP  | 3973 | 691  | 0.00114264 |
| GO 0060255       | regulation of macromolecule metabolic process                  | BP  | 3821 | 690  | 7.41E-06   |
| GO 0006139       | nucleobase-containing compound metabolic process               | BP  | 3888 | 681  | 0.00056452 |
| GO 0080090       | regulation of primary metabolic process                        | BP  | 3729 | 680  | 2.03E-06   |
| GO 0009058       | biosynthetic process                                           | BP  | 4005 | 679  | 0.01669311 |
| GO 1901576       | organic substance biosynthetic process                         | BP  | 3970 | 674  | 0.01527959 |
| GO 0044249       | cellular biosynthetic process                                  | BP  | 3912 | 667  | 0.01097478 |
| GO 0051171       | regulation of nitrogen compound metabolic process              | BP  | 3624 | 666  | 8.43E-07   |
| GO 0048518       | positive regulation of biological process                      | BP  | 3597 | 660  | 1.28E-06   |
| GO 0051179       | localization                                                   | BP  | 3839 | 645  | 0.04098004 |
| GO 0019538       | protein metabolic process                                      | BP  | 3717 | 643  | 0.00340821 |
| GO 0032501       | multicellular organismal process                               | BP  | 3639 | 623  | 0.01056772 |
| GO 0010467       | gene expression                                                | BP  | 3579 | 611  | 0.01457396 |
| GO 0090304       | nucleic acid metabolic process                                 | BP  | 3445 | 610  | 0.00042955 |
| GO 0048522       | positive regulation of cellular process                        | BP  | 3251 | 605  | 6.59E-07   |
| GO 0044267       | cellular protein metabolic process                             | BP  | 3432 | 603  | 0.00109426 |
| GO 0032502       | developmental process                                          | BP  | 3356 | 593  | 0.00068714 |
| GO 0048519       | negative regulation of biological process                      | BP  | 3227 | 570  | 0.00097324 |
| GO 0023052       | signaling                                                      | BP  | 3317 | 559  | 0.04919217 |
| GO 0009059       | macromolecule biosynthetic process                             | BP  | 3237 | 556  | 0.01332922 |
| GO 0044271       | cellular nitrogen compound biosynthetic process                | BP  | 3199 | 547  | 0.01982119 |
| GO 0048856       | anatomical structure development                               | BP  | 3115 | 546  | 0.00271127 |
| GO 0034645       | cellular macromolecule biosynthetic process                    | BP  | 3159 | 545  | 0.01032857 |
| GO 0016070       | RNA metabolic process                                          | BP  | 3052 | 533  | 0.00428634 |
| GO 0048523       | negative regulation of cellular process                        | BP  | 2860 | 528  | 1.51E-05   |
| GO 0043412       | macromolecule modification                                     | BP  | 2845 | 524  | 2.20E-05   |
| GO 0006996       | organelle organization                                         | BP  | 2763 | 523  | 6.88E-07   |
| GO 0006464       | cellular protein modification process                          | BP  | 2693 | 499  | 1.96E-05   |
| GO 0036211       | protein modification process                                   | BP  | 2693 | 499  | 1.96E-05   |
| GO 0010468       | regulation of gene expression                                  | BP  | 2810 | 490  | 0.00737702 |
| GO 0009889       | regulation of biosynthetic process                             | BP  | 2649 | 489  | 3.80E-05   |
| GO 0007275       | multicellular organism development                             | BP  | 2835 | 489  | 0.01622677 |
| GO 1901362       | organic cyclic compound biosynthetic process                   | BP  | 2792 | 487  | 0.0074291  |
| GO 0031326       | regulation of cellular biosynthetic process                    | BP  | 2598 | 481  | 3.30E-05   |
| GO 0018130       | heterocycle biosynthetic process                               | BP  | 2711 | 477  | 0.00423476 |
| GO 0019438       | aromatic compound biosynthetic process                         | BP  | 2706 | 475  | 0.00519021 |
| GO 0019219       | regulation of nucleobase-containing compound metabolic process | BP  | 2560 | 471  | 8.06E-05   |
| GO 0010556       | regulation of macromolecule biosynthetic process               | BP  | 2521 | 466  | 5.53E-05   |
| GO 0034654       | nucleobase-containing compound biosynthetic process            | BP  | 2665 | 466  | 0.00757368 |
| GO 2000112       | regulation of cellular macromolecule biosynthetic process      | BP  | 2448 | 450  | 0.00013681 |
| GO 0048731       | system development                                             | BP  | 2547 | 441  | 0.01826338 |
| GO 0009893       | positive regulation of metabolic process                       | BP  | 2282 | 432  | 1.04E-05   |
| GO 0051252       | regulation of RNA metabolic process                            | BP  | 2357 | 427  | 0.00078296 |
| GO 0048869       | cellular developmental process                                 | BP  | 2278 | 421  | 0.0001512  |
| GO 0006950       | response to stress                                             | BP  | 2344 | 420  | 0.00210278 |
| GO 0044085       | cellular component biogenesis                                  | BP  | 2236 | 416  | 9.06E-05   |
| GO 0010604       | positive regulation of macromolecule metabolic process         | BP  | 2125 | 411  | 1.90E-06   |
| GO 0032774       | RNA biosynthetic process                                       | BP  | 2295 | 410  | 0.00300744 |
| GO 0097659       | nucleic acid-templated transcription                           | BP  | 2286 | 408  | 0.00330987 |
| GO 0006351       | transcription DNA-templated                                    | BP  | 2255 | 402  | 0.0038823  |
| GO 0031325       | positive regulation of cellular metabolic process              | BP  | 2107 | 401  | 1.45E-05   |
| GO 0051173       | positive regulation of nitrogen compound metabolic process     | BP  | 2026 | 398  | 5.26E-07   |
| GO 0030154       | cell differentiation                                           | BP  | 2139 | 391  | 0.00069902 |
| GO 2001141       | regulation of RNA biosynthetic process                         | BP  | 2165 | 389  | 0.00264751 |
| GO 1903506       | regulation of nucleic acid-templated transcription             | BP  | 2162 | 388  | 0.00292067 |
| GO 0022607       | cellular component assembly                                    | BP  | 2026 | 383  | 4.58E-05   |
| GO 0051641       | cellular localization                                          | BP  | 2062 | 383  | 0.00021937 |
| GO 0006355       | regulation of transcription DNA-templated                      | BP  | 2121 | 377  | 0.00641805 |
| GO 0033036       | macromolecule localization                                     | BP  | 2102 | 375  | 0.00518334 |
| GO 0008104       | protein localization                                           | BP  | 1902 | 345  | 0.00264066 |
| GO 0065009       | regulation of molecular function                               | BP  | 1881 | 341  | 0.00291275 |
| GO 0009892       | negative regulation of metabolic process                       | BP  | 1920 | 341  | 0.01018677 |

|            |                                                                    |    |      |     |            |
|------------|--------------------------------------------------------------------|----|------|-----|------------|
| GO 0051246 | regulation of protein metabolic process                            | BP | 1763 | 324 | 0 00157384 |
| GO 0010605 | negative regulation of macromolecule metabolic process             | BP | 1775 | 316 | 0 01185103 |
| GO 0031324 | negative regulation of cellular metabolic process                  | BP | 1647 | 312 | 0 00024058 |
| GO 0032268 | regulation of cellular protein metabolic process                   | BP | 1649 | 305 | 0 0014711  |
| GO 0051128 | regulation of cellular component organization                      | BP | 1639 | 299 | 0 00380902 |
| GO 0035556 | intracellular signal transduction                                  | BP | 1687 | 296 | 0 02959923 |
| GO 0007049 | cell cycle                                                         | BP | 1344 | 293 | 1 08E-09   |
| GO 0051172 | negative regulation of nitrogen compound metabolic process         | BP | 1543 | 290 | 0 00070774 |
| GO 0051649 | establishment of localization in cell                              | BP | 1590 | 287 | 0 00819669 |
| GO 0043933 | protein-containing complex subunit organization                    | BP | 1569 | 282 | 0 01091449 |
| GO 0045184 | establishment of protein localization                              | BP | 1481 | 267 | 0 01141108 |
| GO 0070727 | cellular macromolecule localization                                | BP | 1402 | 265 | 0 0008778  |
| GO 0034613 | cellular protein localization                                      | BP | 1392 | 264 | 0 0007295  |
| GO 0051704 | multi-organism process                                             | BP | 1381 | 263 | 0 00057697 |
| GO 0050790 | regulation of catalytic activity                                   | BP | 1447 | 263 | 0 0080913  |
| GO 0033554 | cellular response to stress                                        | BP | 1454 | 263 | 0 01026301 |
| GO 0009653 | anatomical structure morphogenesis                                 | BP | 1452 | 262 | 0 01169637 |
| GO 0032879 | regulation of localization                                         | BP | 1471 | 257 | 0 04896785 |
| GO 0065003 | protein-containing complex assembly                                | BP | 1343 | 255 | 0 00084707 |
| GO 0046907 | intracellular transport                                            | BP | 1394 | 249 | 0 02169567 |
| GO 0007399 | nervous system development                                         | BP | 1285 | 245 | 0 000849   |
| GO 0008219 | cell death                                                         | BP | 1384 | 244 | 0 03877728 |
| GO 0009891 | positive regulation of biosynthetic process                        | BP | 1292 | 237 | 0 00775061 |
| GO 0031328 | positive regulation of cellular biosynthetic process               | BP | 1278 | 236 | 0 00572793 |
| GO 0010628 | positive regulation of gene expression                             | BP | 1279 | 235 | 0 00741477 |
| GO 0012501 | programmed cell death                                              | BP | 1306 | 232 | 0 03263183 |
| GO 0010557 | positive regulation of macromolecule biosynthetic process          | BP | 1232 | 231 | 0 00294542 |
| GO 0044093 | positive regulation of molecular function                          | BP | 1123 | 230 | 1 31E-05   |
| GO 0045935 | positive regulation of nucleobase-containing compound metabolic    | BP | 1257 | 226 | 0 02177913 |
| GO 0006915 | apoptotic process                                                  | BP | 1231 | 225 | 0 01105068 |
| GO 0048468 | cell development                                                   | BP | 1144 | 224 | 0 00031847 |
| GO 0006928 | movement of cell or subcellular component                          | BP | 1094 | 219 | 9 74E-05   |
| GO 0051247 | positive regulation of protein metabolic process                   | BP | 1055 | 218 | 1 23E-05   |
| GO 0031399 | regulation of protein modification process                         | BP | 1142 | 218 | 0 00156764 |
| GO 0008283 | cell proliferation                                                 | BP | 1189 | 217 | 0 01331583 |
| GO 0006468 | protein phosphorylation                                            | BP | 1146 | 212 | 0 00808234 |
| GO 0022402 | cell cycle process                                                 | BP | 976  | 209 | 1 54E-06   |
| GO 0009890 | negative regulation of biosynthetic process                        | BP | 1039 | 203 | 0 00069631 |
| GO 0031327 | negative regulation of cellular biosynthetic process               | BP | 1023 | 202 | 0 00040444 |
| GO 0032270 | positive regulation of cellular protein metabolic process          | BP | 992  | 201 | 9 45E-05   |
| GO 0051254 | positive regulation of RNA metabolic process                       | BP | 1124 | 200 | 0 04298421 |
| GO 0045934 | negative regulation of nucleobase-containing compound metaboli     | BP | 985  | 197 | 0 00023637 |
| GO 0009057 | macromolecule catabolic process                                    | BP | 1054 | 195 | 0 0108828  |
| GO 0010558 | negative regulation of macromolecule biosynthetic process          | BP | 988  | 194 | 0 0007106  |
| GO 1902680 | positive regulation of RNA biosynthetic process                    | BP | 1058 | 194 | 0 01574449 |
| GO 0030030 | cell projection organization                                       | BP | 915  | 193 | 1 11E-05   |
| GO 1903508 | positive regulation of nucleic acid-templated transcription        | BP | 1057 | 193 | 0 01877098 |
| GO 0051276 | chromosome organization                                            | BP | 915  | 192 | 1 64E-05   |
| GO 0010941 | regulation of cell death                                           | BP | 1044 | 192 | 0 01450714 |
| GO 0007010 | cytoskeleton organization                                          | BP | 874  | 191 | 1 12E-06   |
| GO 0022008 | neurogenesis                                                       | BP | 877  | 190 | 2 19E-06   |
| GO 0051174 | regulation of phosphorus metabolic process                         | BP | 1047 | 190 | 0 02455805 |
| GO 0120036 | plasma membrane bounded cell projection organization               | BP | 894  | 189 | 1 19E-05   |
| GO 0019220 | regulation of phosphate metabolic process                          | BP | 1045 | 189 | 0 02803232 |
| GO 0040011 | locomotion                                                         | BP | 965  | 188 | 0 00127136 |
| GO 0051726 | regulation of cell cycle                                           | BP | 870  | 185 | 1 03E-05   |
| GO 2000113 | negative regulation of cellular macromolecule biosynthetic process | BP | 944  | 184 | 0 00139846 |
| GO 0043085 | positive regulation of catalytic activity                          | BP | 905  | 183 | 0 0002215  |
| GO 0045893 | positive regulation of transcription DNA-templated                 | BP | 987  | 182 | 0 01549504 |
| GO 0048699 | generation of neurons                                              | BP | 819  | 181 | 1 02E-06   |
| GO 0042981 | regulation of apoptotic process                                    | BP | 961  | 180 | 0 00881524 |
| GO 0043067 | regulation of programmed cell death                                | BP | 975  | 180 | 0 01534298 |
| GO 0033043 | regulation of organelle organization                               | BP | 907  | 179 | 0 00089731 |
| GO 0051240 | positive regulation of multicellular organismal process            | BP | 916  | 173 | 0 00735515 |
| GO 0051253 | negative regulation of RNA metabolic process                       | BP | 886  | 172 | 0 00238964 |
| GO 0044265 | cellular macromolecule catabolic process                           | BP | 916  | 171 | 0 01196775 |
| GO 0000278 | mitotic cell cycle                                                 | BP | 760  | 169 | 1 61E-06   |
| GO 0042325 | regulation of phosphorylation                                      | BP | 918  | 168 | 0 02533063 |
| GO 1901565 | organonitrogen compound catabolic process                          | BP | 896  | 164 | 0 02679439 |
| GO 0030182 | neuron differentiation                                             | BP | 737  | 162 | 5 48E-06   |
| GO 0048870 | cell motility                                                      | BP | 843  | 160 | 0 00814397 |
| GO 0051674 | localization of cell                                               | BP | 843  | 160 | 0 00814397 |
| GO 0001932 | regulation of protein phosphorylation                              | BP | 839  | 158 | 0 01132783 |
| GO 0034622 | cellular protein-containing complex assembly                       | BP | 838  | 157 | 0 01386503 |
| GO 1902679 | negative regulation of RNA biosynthetic process                    | BP | 821  | 156 | 0 00856589 |
| GO 1903507 | negative regulation of nucleic acid-templated transcription        | BP | 821  | 156 | 0 00856589 |
| GO 0070647 | protein modification by small protein conjugation or removal       | BP | 836  | 155 | 0 02046061 |
| GO 0051130 | positive regulation of cellular component organization             | BP | 800  | 152 | 0 00941836 |
| GO 0016477 | cell migration                                                     | BP | 777  | 151 | 0 00416663 |
| GO 0018193 | peptidyl-amino acid modification                                   | BP | 818  | 150 | 0 0314287  |
| GO 0045892 | negative regulation of transcription DNA-templated                 | BP | 789  | 149 | 0 01246043 |
| GO 1903047 | mitotic cell cycle process                                         | BP | 661  | 146 | 1 25E-05   |
| GO 0031401 | positive regulation of protein modification process                | BP | 724  | 146 | 0 00108816 |
| GO 0051336 | regulation of hydrolase activity                                   | BP | 783  | 146 | 0 02011601 |
| GO 0006259 | DNA metabolic process                                              | BP | 754  | 143 | 0 01232138 |

|            |                                                                   |    |     |     |            |
|------------|-------------------------------------------------------------------|----|-----|-----|------------|
| GO 0030163 | protein catabolic process                                         | BP | 705 | 142 | 0 00133386 |
| GO 0051094 | positive regulation of developmental process                      | BP | 741 | 139 | 0 01911756 |
| GO 0006974 | cellular response to DNA damage stimulus                          | BP | 683 | 137 | 0 00190302 |
| GO 0033365 | protein localization to organelle                                 | BP | 716 | 136 | 0 01375122 |
| GO 0045944 | positive regulation of transcription by RNA polymerase            | BP | 741 | 136 | 0 03820239 |
| GO 0006952 | defense response                                                  | BP | 745 | 136 | 0 04421753 |
| GO 0032989 | cellular component morphogenesis                                  | BP | 650 | 131 | 0 00198282 |
| GO 0048666 | neuron development                                                | BP | 610 | 128 | 0 00044461 |
| GO 0007017 | microtubule-based process                                         | BP | 503 | 127 | 2 76E-08   |
| GO 0044087 | regulation of cellular component biogenesis                       | BP | 630 | 126 | 0 0031725  |
| GO 0006325 | chromatin organization                                            | BP | 584 | 125 | 0 00022279 |
| GO 0000902 | cell morphogenesis                                                | BP | 601 | 124 | 0 00106997 |
| GO 0044257 | cellular protein catabolic process                                | BP | 605 | 123 | 0 00195585 |
| GO 0044419 | interspecies interaction between organisms                        | BP | 619 | 123 | 0 0044268  |
| GO 0044403 | symbiont process                                                  | BP | 607 | 122 | 0 00308042 |
| GO 0032446 | protein modification by small protein conjugation                 | BP | 645 | 120 | 0 03491968 |
| GO 0010564 | regulation of cell cycle process                                  | BP | 547 | 119 | 0 00015757 |
| GO 0031175 | neuron projection development                                     | BP | 555 | 118 | 0 00043714 |
| GO 0060341 | regulation of cellular localization                               | BP | 594 | 118 | 0 0052981  |
| GO 0051603 | proteolysis involved in cellular protein catabolic process        | BP | 560 | 117 | 0 00091582 |
| GO 0007167 | enzyme linked receptor protein signaling pathway                  | BP | 611 | 117 | 0 01691962 |
| GO 0032880 | regulation of protein localization                                | BP | 613 | 117 | 0 01856959 |
| GO 0016032 | viral process                                                     | BP | 577 | 115 | 0 00527603 |
| GO 0051640 | organelle localization                                            | BP | 501 | 113 | 4 87E-05   |
| GO 0051301 | cell division                                                     | BP | 477 | 112 | 8 14E-06   |
| GO 0016567 | protein ubiquitination                                            | BP | 601 | 112 | 0 03888567 |
| GO 0042327 | positive regulation of phosphorylation                            | BP | 589 | 109 | 0 04855059 |
| GO 0001934 | positive regulation of protein phosphorylation                    | BP | 559 | 107 | 0 02191019 |
| GO 0043632 | modification-dependent macromolecule catabolic process            | BP | 499 | 106 | 0 00087057 |
| GO 0007417 | central nervous system development                                | BP | 535 | 106 | 0 00861489 |
| GO 0007346 | regulation of mitotic cell cycle                                  | BP | 472 | 103 | 0 00038315 |
| GO 0019941 | modification-dependent protein catabolic process                  | BP | 488 | 103 | 0 00128266 |
| GO 0006511 | ubiquitin-dependent protein catabolic process                     | BP | 482 | 102 | 0 00123482 |
| GO 0000226 | microtubule cytoskeleton organization                             | BP | 374 | 99  | 8 82E-08   |
| GO 0060284 | regulation of cell development                                    | BP | 521 | 98  | 0 04122893 |
| GO 0051960 | regulation of nervous system development                          | BP | 502 | 96  | 0 02941617 |
| GO 0051345 | positive regulation of hydrolase activity                         | BP | 488 | 95  | 0 01957525 |
| GO 0051129 | negative regulation of cellular component organization            | BP | 471 | 94  | 0 01059062 |
| GO 0009607 | response to biotic stimulus                                       | BP | 501 | 94  | 0 04736816 |
| GO 0000904 | cell morphogenesis involved in differentiation                    | BP | 425 | 92  | 0 00101022 |
| GO 0045786 | negative regulation of cell cycle                                 | BP | 453 | 92  | 0 00707857 |
| GO 0030029 | actin filament-based process                                      | BP | 456 | 91  | 0 01179573 |
| GO 0050767 | regulation of neurogenesis                                        | BP | 459 | 91  | 0 0139734  |
| GO 0006281 | DNA repair                                                        | BP | 440 | 90  | 0 00630105 |
| GO 0060322 | head development                                                  | BP | 446 | 90  | 0 00912074 |
| GO 0032990 | cell part morphogenesis                                           | BP | 384 | 87  | 0 00030208 |
| GO 0007420 | brain development                                                 | BP | 414 | 87  | 0 00335546 |
| GO 0044770 | cell cycle phase transition                                       | BP | 445 | 87  | 0 02233622 |
| GO 0010638 | positive regulation of organelle organization                     | BP | 453 | 87  | 0 03346565 |
| GO 0120039 | plasma membrane bounded cell projection morphogenesis             | BP | 365 | 85  | 0 00013436 |
| GO 0048858 | cell projection morphogenesis                                     | BP | 366 | 85  | 0 00014829 |
| GO 0044772 | mitotic cell cycle phase transition                               | BP | 415 | 85  | 0 00751595 |
| GO 0048812 | neuron projection morphogenesis                                   | BP | 355 | 84  | 8 23E-05   |
| GO 0016569 | covalent chromatin modification                                   | BP | 372 | 84  | 0 00042664 |
| GO 0007169 | transmembrane receptor protein tyrosine kinase signaling pathway  | BP | 433 | 84  | 0 02906921 |
| GO 0070201 | regulation of establishment of protein localization               | BP | 439 | 84  | 0 03909552 |
| GO 0010498 | proteasomal protein catabolic process                             | BP | 384 | 83  | 0 00182427 |
| GO 0097435 | supramolecular fiber organization                                 | BP | 413 | 83  | 0 01320397 |
| GO 0030036 | actin cytoskeleton organization                                   | BP | 420 | 83  | 0 01971164 |
| GO 0016570 | histone modification                                              | BP | 367 | 82  | 0 0006992  |
| GO 0030031 | cell projection assembly                                          | BP | 385 | 82  | 0 00296915 |
| GO 0051347 | positive regulation of transferase activity                       | BP | 416 | 82  | 0 02159297 |
| GO 0120031 | plasma membrane bounded cell projection assembly                  | BP | 378 | 81  | 0 00264077 |
| GO 0051493 | regulation of cytoskeleton organization                           | BP | 353 | 79  | 0 00082601 |
| GO 0048609 | multicellular organismal reproductive process                     | BP | 402 | 79  | 0 02541901 |
| GO 0032504 | multicellular organism reproduction                               | BP | 404 | 79  | 0 02829451 |
| GO 0051656 | establishment of organelle localization                           | BP | 341 | 76  | 0 00116154 |
| GO 1903827 | regulation of cellular protein localization                       | BP | 381 | 76  | 0 02025877 |
| GO 0048667 | cell morphogenesis involved in neuron differentiation             | BP | 322 | 75  | 0 00032457 |
| GO 0007264 | small GTPase mediated signal transduction                         | BP | 370 | 74  | 0 02054977 |
| GO 0045596 | negative regulation of cell differentiation                       | BP | 374 | 74  | 0 02584129 |
| GO 0010563 | negative regulation of phosphorus metabolic process               | BP | 382 | 74  | 0 03967082 |
| GO 0043161 | proteasome-mediated ubiquitin-dependent protein catabolic process | BP | 333 | 73  | 0 00227932 |
| GO 0048285 | organelle fission                                                 | BP | 335 | 72  | 0 00409547 |
| GO 0043254 | regulation of protein complex assembly                            | BP | 327 | 70  | 0 00508448 |
| GO 1902532 | negative regulation of intracellular signal transduction          | BP | 352 | 70  | 0 02668871 |
| GO 0000280 | nuclear division                                                  | BP | 304 | 69  | 0 0011616  |
| GO 0044089 | positive regulation of cellular component biogenesis              | BP | 353 | 69  | 0 03862266 |
| GO 0061564 | axon development                                                  | BP | 277 | 68  | 0 00012134 |
| GO 0040017 | positive regulation of locomotion                                 | BP | 327 | 66  | 0 0229475  |
| GO 0007276 | gamete generation                                                 | BP | 336 | 66  | 0 03868878 |
| GO 0007409 | axonogenesis                                                      | BP | 252 | 64  | 6 60E-05   |
| GO 0051272 | positive regulation of cellular component movement                | BP | 316 | 64  | 0 02319421 |
| GO 0045860 | positive regulation of protein kinase activity                    | BP | 326 | 64  | 0 04164677 |
| GO 0042176 | regulation of protein catabolic process                           | BP | 297 | 63  | 0 00928676 |



|            |                                                                        |    |     |    |            |
|------------|------------------------------------------------------------------------|----|-----|----|------------|
| GO 0051169 | nuclear transport                                                      | BP | 293 | 62 | 0 01033351 |
| GO 0051052 | regulation of DNA metabolic process                                    | BP | 306 | 62 | 0 0249368  |
| GO 0007265 | Ras protein signal transduction                                        | BP | 297 | 61 | 0 01999964 |
| GO 0016049 | cell growth                                                            | BP | 299 | 61 | 0 02277779 |
| GO 0006913 | nucleocytoplasmic transport                                            | BP | 290 | 60 | 0 01813019 |
| GO 1901990 | regulation of mitotic cell cycle phase transition                      | BP | 298 | 60 | 0 03035142 |
| GO 0030335 | positive regulation of cell migration                                  | BP | 303 | 60 | 0 04080667 |
| GO 0032386 | regulation of intracellular transport                                  | BP | 300 | 59 | 0 04741958 |
| GO 0010639 | negative regulation of organelle organization                          | BP | 274 | 58 | 0 01271279 |
| GO 0006935 | chemotaxis                                                             | BP | 290 | 58 | 0 03686633 |
| GO 0042330 | taxis                                                                  | BP | 291 | 58 | 0 03912143 |
| GO 0033044 | regulation of chromosome organization                                  | BP | 272 | 57 | 0 01634372 |
| GO 0051962 | positive regulation of nervous system development                      | BP | 277 | 57 | 0 02306719 |
| GO 0009617 | response to bacterium                                                  | BP | 279 | 57 | 0 0263114  |
| GO 1904951 | positive regulation of establishment of protein localization           | BP | 280 | 56 | 0 03969674 |
| GO 0140014 | mitotic nuclear division                                               | BP | 236 | 55 | 0 00189751 |
| GO 0007059 | chromosome segregation                                                 | BP | 251 | 55 | 0 0074806  |
| GO 0006260 | DNA replication                                                        | BP | 233 | 54 | 0 00236007 |
| GO 0030900 | forebrain development                                                  | BP | 203 | 53 | 0 00012774 |
| GO 0044782 | cilium organization                                                    | BP | 245 | 52 | 0 01673993 |
| GO 0060249 | anatomical structure homeostasis                                       | BP | 259 | 52 | 0 04334415 |
| GO 0060271 | cilium assembly                                                        | BP | 241 | 51 | 0 01865376 |
| GO 1903829 | positive regulation of cellular protein localization                   | BP | 251 | 51 | 0 03725715 |
| GO 0051056 | regulation of small GTPase mediated signal transduction                | BP | 210 | 46 | 0 0136489  |
| GO 0007018 | microtubule-based movement                                             | BP | 171 | 45 | 0 00033086 |
| GO 0070997 | neuron death                                                           | BP | 210 | 45 | 0 02112135 |
| GO 0000209 | protein polyubiquitination                                             | BP | 213 | 45 | 0 02656262 |
| GO 0019058 | viral life cycle                                                       | BP | 218 | 45 | 0 03801909 |
| GO 0006302 | double-strand break repair                                             | BP | 183 | 44 | 0 00275943 |
| GO 1901214 | regulation of neuron death                                             | BP | 183 | 43 | 0 00478454 |
| GO 0007568 | aging                                                                  | BP | 195 | 43 | 0 01491642 |
| GO 0009895 | negative regulation of catabolic process                               | BP | 208 | 43 | 0 0408897  |
| GO 0031589 | cell-substrate adhesion                                                | BP | 209 | 43 | 0 04380964 |
| GO 0022406 | membrane docking                                                       | BP | 149 | 42 | 0 00010198 |
| GO 0007249 | -kappaB kinase/NF-kappaB signaling                                     | BP | 189 | 42 | 0 01406845 |
| GO 0071375 | cellular response to peptide hormone stimulus                          | BP | 197 | 42 | 0 02726921 |
| GO 0006310 | DNA recombination                                                      | BP | 198 | 42 | 0 02944397 |
| GO 0010721 | negative regulation of cell development                                | BP | 184 | 41 | 0 01446561 |
| GO 0044839 | cell cycle G2/M phase transition                                       | BP | 185 | 41 | 0 01580305 |
| GO 0051258 | protein polymerization                                                 | BP | 191 | 41 | 0 02607052 |
| GO 0140056 | organelle localization by membrane tethering                           | BP | 141 | 40 | 0 00012691 |
| GO 0032886 | regulation of microtubule-based process                                | BP | 155 | 40 | 0 00104257 |
| GO 0045732 | positive regulation of protein catabolic process                       | BP | 166 | 40 | 0 00401706 |
| GO 1903320 | regulation of protein modification by small protein conjugation or re  | BP | 189 | 40 | 0 0340353  |
| GO 0021537 | telencephalon development                                              | BP | 138 | 39 | 0 00016737 |
| GO 0070507 | regulation of microtubule cytoskeleton organization                    | BP | 139 | 39 | 0 00019748 |
| GO 0050768 | negative regulation of neurogenesis                                    | BP | 163 | 39 | 0 00507097 |
| GO 0043122 | regulation of -kappaB kinase/NF-kappaB signaling                       | BP | 168 | 39 | 0 00858873 |
| GO 0000086 | G2/M transition of mitotic cell cycle                                  | BP | 169 | 39 | 0 00949314 |
| GO 0051961 | negative regulation of nervous system development                      | BP | 176 | 39 | 0 01827068 |
| GO 0031330 | negative regulation of cellular catabolic process                      | BP | 185 | 39 | 0 03800838 |
| GO 0051235 | maintenance of location                                                | BP | 188 | 39 | 0 04732459 |
| GO 0007159 | leukocyte cell-cell adhesion                                           | BP | 175 | 38 | 0 02650091 |
| GO 0042063 | gliogenesis                                                            | BP | 155 | 37 | 0 0064754  |
| GO 0032496 | response to lipopolysaccharide                                         | BP | 166 | 37 | 0 01933601 |
| GO 0002237 | response to molecule of bacterial origin                               | BP | 172 | 37 | 0 0322353  |
| GO 0032868 | response to insulin                                                    | BP | 177 | 37 | 0 04735721 |
| GO 0051783 | regulation of nuclear division                                         | BP | 152 | 36 | 0 00815689 |
| GO 0097191 | extrinsic apoptotic signaling pathway                                  | BP | 156 | 36 | 0 0123418  |
| GO 1903050 | regulation of proteolysis involved in cellular protein catabolic proce | BP | 172 | 36 | 0 04910628 |
| GO 2001252 | positive regulation of chromosome organization                         | BP | 140 | 35 | 0 00366063 |
| GO 0007088 | regulation of mitotic nuclear division                                 | BP | 143 | 35 | 0 00526022 |
| GO 0051701 | interaction with host                                                  | BP | 154 | 35 | 0 0169305  |
| GO 0043393 | regulation of protein binding                                          | BP | 162 | 35 | 0 03443631 |
| GO 0000819 | sister chromatid segregation                                           | BP | 164 | 35 | 0 04045452 |
| GO 0031396 | regulation of protein ubiquitination                                   | BP | 165 | 35 | 0 04374548 |
| GO 0007051 | spindle organization                                                   | BP | 139 | 34 | 0 00595112 |
| GO 0051091 | positive regulation of DNA-binding transcription factor activity       | BP | 161 | 34 | 0 04894973 |
| GO 0046578 | regulation of Ras protein signal transduction                          | BP | 144 | 33 | 0 01775604 |
| GO 0007163 | establishment or maintenance of cell polarity                          | BP | 144 | 33 | 0 01775604 |
| GO 1902749 | regulation of cell cycle G2/M phase transition                         | BP | 144 | 33 | 0 01775604 |
| GO 0007160 | cell-matrix adhesion                                                   | BP | 136 | 32 | 0 01333135 |
| GO 0043123 | positive regulation of -kappaB kinase/NF-kappaB signaling              | BP | 136 | 32 | 0 01333135 |
| GO 0070372 | regulation of ERK1 and ERK2 cascade                                    | BP | 148 | 32 | 0 04129587 |
| GO 0071559 | response to transforming growth factor beta                            | BP | 149 | 32 | 0 04483234 |
| GO 1901215 | negative regulation of neuron death                                    | BP | 119 | 31 | 0 00310617 |
| GO 0010389 | regulation of G2/M transition of mitotic cell cycle                    | BP | 130 | 31 | 0 01214863 |
| GO 0045665 | negative regulation of neuron differentiation                          | BP | 135 | 31 | 0 02052325 |
| GO 1902275 | regulation of chromatin organization                                   | BP | 136 | 31 | 0 02264658 |
| GO 0051402 | neuron apoptotic process                                               | BP | 142 | 31 | 0 03921265 |
| GO 0051321 | meiotic cell cycle                                                     | BP | 143 | 31 | 0 04268628 |
| GO 0071560 | cellular response to transforming growth factor beta stimulus          | BP | 144 | 31 | 0 046384   |
| GO 0032869 | cellular response to insulin stimulus                                  | BP | 144 | 31 | 0 046384   |
| GO 0021543 | pallium development                                                    | BP | 101 | 30 | 0 00036197 |
| GO 0031023 | microtubule organizing center organization                             | BP | 105 | 30 | 0 00074351 |

|            |                                                                        |    |     |    |            |
|------------|------------------------------------------------------------------------|----|-----|----|------------|
| GO 2000058 | regulation of ubiquitin-dependent protein catabolic process            | BP | 120 | 30 | 0 0067938  |
| GO 0048588 | developmental cell growth                                              | BP | 128 | 30 | 0 01706838 |
| GO 0030705 | cytoskeleton-dependent intracellular transport                         | BP | 130 | 30 | 0 02098765 |
| GO 0007411 | axon guidance                                                          | BP | 134 | 30 | 0 03092362 |
| GO 0097485 | neuron projection guidance                                             | BP | 134 | 30 | 0 03092362 |
| GO 0043542 | endothelial cell migration                                             | BP | 136 | 30 | 0 03707872 |
| GO 0010970 | transport along microtubule                                            | BP | 114 | 29 | 0 00595381 |
| GO 0099111 | microtubule-based transport                                            | BP | 114 | 29 | 0 00595381 |
| GO 0043523 | regulation of neuron apoptotic process                                 | BP | 121 | 29 | 0 01394073 |
| GO 0050890 | cognition                                                              | BP | 133 | 29 | 0 04558014 |
| GO 0006479 | protein methylation                                                    | BP | 134 | 29 | 0 04962813 |
| GO 0008213 | protein alkylation                                                     | BP | 134 | 29 | 0 04962813 |
| GO 0006275 | regulation of DNA replication                                          | BP | 91  | 28 | 0 00029592 |
| GO 0007098 | centrosome cycle                                                       | BP | 97  | 28 | 0 00092271 |
| GO 0010001 | glial cell differentiation                                             | BP | 115 | 28 | 0 01255617 |
| GO 1902850 | microtubule cytoskeleton organization involved in mitosis              | BP | 111 | 27 | 0 01423805 |
| GO 0051100 | negative regulation of binding                                         | BP | 119 | 27 | 0 03354008 |
| GO 0006333 | chromatin assembly or disassembly                                      | BP | 123 | 27 | 0 04861863 |
| GO 0000724 | double-strand break repair via homologous recombination                | BP | 94  | 26 | 0 00268428 |
| GO 0000725 | recombinational repair                                                 | BP | 95  | 26 | 0 00314687 |
| GO 0019827 | stem cell population maintenance                                       | BP | 102 | 26 | 0 00865098 |
| GO 0098727 | maintenance of cell number                                             | BP | 104 | 26 | 0 01120683 |
| GO 0051017 | actin filament bundle assembly                                         | BP | 106 | 26 | 0 01434148 |
| GO 0061572 | actin filament bundle organization                                     | BP | 108 | 26 | 0 01814032 |
| GO 1903364 | positive regulation of cellular protein catabolic process              | BP | 112 | 26 | 0 02808489 |
| GO 0007179 | transforming growth factor beta receptor signaling pathway             | BP | 115 | 26 | 0 03794695 |
| GO 0051494 | negative regulation of cytoskeleton organization                       | BP | 91  | 25 | 0 00354002 |
| GO 0008286 | insulin receptor signaling pathway                                     | BP | 93  | 25 | 0 00482458 |
| GO 0032434 | regulation of proteasomal ubiquitin-dependent protein catabolic p      | BP | 100 | 25 | 0 01271394 |
| GO 0045216 | cell-cell junction organization                                        | BP | 104 | 25 | 0 02058816 |
| GO 0051302 | regulation of cell division                                            | BP | 107 | 25 | 0 02866751 |
| GO 1903046 | meiotic cell cycle process                                             | BP | 109 | 25 | 0 03526753 |
| GO 0051053 | negative regulation of DNA metabolic process                           | BP | 111 | 25 | 0 04294566 |
| GO 0060759 | regulation of response to cytokine stimulus                            | BP | 111 | 25 | 0 04294566 |
| GO 0097711 | ciliary basal body-plasma membrane docking                             | BP | 84  | 24 | 0 00241222 |
| GO 0061351 | neural precursor cell proliferation                                    | BP | 85  | 24 | 0 00286335 |
| GO 0031333 | negative regulation of protein complex assembly                        | BP | 90  | 24 | 0 00632702 |
| GO 0030260 | entry into host cell                                                   | BP | 93  | 24 | 0 00971011 |
| GO 0044409 | entry into host                                                        | BP | 93  | 24 | 0 00971011 |
| GO 0051806 | entry into cell of other organism involved in symbiotic interaction    | BP | 93  | 24 | 0 00971011 |
| GO 0051828 | entry into other organism involved in symbiotic interaction            | BP | 93  | 24 | 0 00971011 |
| GO 1990138 | neuron projection extension                                            | BP | 98  | 24 | 0 01848318 |
| GO 0001959 | regulation of cytokine-mediated signaling pathway                      | BP | 103 | 24 | 0 03252746 |
| GO 0021987 | cerebral cortex development                                            | BP | 69  | 23 | 0 00027756 |
| GO 0051261 | protein depolymerization                                               | BP | 70  | 23 | 0 00035187 |
| GO 0046718 | viral entry into host cell                                             | BP | 83  | 23 | 0 00447667 |
| GO 1903052 | positive regulation of proteolysis involved in cellular protein catabo | BP | 95  | 23 | 0 0236557  |
| GO 0030010 | establishment of cell polarity                                         | BP | 96  | 23 | 0 02656216 |
| GO 1902904 | negative regulation of supramolecular fiber organization               | BP | 81  | 22 | 0 00693077 |
| GO 0006892 | post-Golgi vesicle-mediated transport                                  | BP | 86  | 22 | 0 01431838 |
| GO 0006633 | fatty acid biosynthetic process                                        | BP | 88  | 22 | 0 01862264 |
| GO 0007052 | mitotic spindle organization                                           | BP | 94  | 22 | 0 03770735 |
| GO 0140013 | meiotic nuclear division                                               | BP | 94  | 22 | 0 03770735 |
| GO 0018022 | peptidyl-lysine methylation                                            | BP | 96  | 22 | 0 0465145  |
| GO 0051651 | maintenance of location in cell                                        | BP | 70  | 21 | 0 00229625 |
| GO 0031109 | microtubule polymerization or depolymerization                         | BP | 79  | 21 | 0 01061773 |
| GO 0048771 | tissue remodeling                                                      | BP | 79  | 21 | 0 01061773 |
| GO 0021953 | central nervous system neuron differentiation                          | BP | 82  | 21 | 0 01626117 |
| GO 0007043 | cell-cell junction assembly                                            | BP | 84  | 21 | 0 02117511 |
| GO 1901800 | positive regulation of proteasomal protein catabolic process           | BP | 84  | 21 | 0 02117511 |
| GO 0051225 | spindle assembly                                                       | BP | 86  | 21 | 0 02716328 |
| GO 0072384 | organelle transport along microtubule                                  | BP | 62  | 20 | 0 00108508 |
| GO 0048675 | axon extension                                                         | BP | 73  | 20 | 0 0088238  |
| GO 1903305 | regulation of regulated secretory pathway                              | BP | 76  | 20 | 0 0139364  |
| GO 0045185 | maintenance of protein location                                        | BP | 77  | 20 | 0 01608238 |
| GO 0043524 | negative regulation of neuron apoptotic process                        | BP | 81  | 20 | 0 02734991 |
| GO 0051817 | modification of morphology or physiology of other organism involv      | BP | 81  | 20 | 0 02734991 |
| GO 0036503 | ERAD pathway                                                           | BP | 82  | 20 | 0 03092692 |
| GO 0035023 | regulation of Rho protein signal transduction                          | BP | 85  | 20 | 0 04375609 |
| GO 0034968 | histone lysine methylation                                             | BP | 85  | 20 | 0 04375609 |
| GO 0043297 | apical junction assembly                                               | BP | 54  | 19 | 0 00042719 |
| GO 0051303 | establishment of chromosome localization                               | BP | 63  | 19 | 0 00340607 |
| GO 0050000 | chromosome localization                                                | BP | 64  | 19 | 0 00413449 |
| GO 0017156 | calcium ion regulated exocytosis                                       | BP | 73  | 19 | 0 01826845 |
| GO 0002705 | positive regulation of leukocyte mediated immunity                     | BP | 74  | 19 | 0 02101272 |
| GO 0032091 | negative regulation of protein binding                                 | BP | 75  | 19 | 0 02406281 |
| GO 0043244 | regulation of protein complex disassembly                              | BP | 75  | 19 | 0 02406281 |
| GO 2000060 | positive regulation of ubiquitin-dependent protein catabolic proces    | BP | 75  | 19 | 0 02406281 |
| GO 0008643 | carbohydrate transport                                                 | BP | 76  | 19 | 0 02743828 |
| GO 1905269 | positive regulation of chromatin organization                          | BP | 78  | 19 | 0 03524157 |
| GO 1901879 | regulation of protein depolymerization                                 | BP | 54  | 18 | 0 00124102 |
| GO 0005976 | polysaccharide metabolic process                                       | BP | 63  | 18 | 0 00799185 |
| GO 0002576 | platelet degranulation                                                 | BP | 69  | 18 | 0 02076462 |
| GO 0034502 | protein localization to chromosome                                     | BP | 72  | 18 | 0 03127329 |
| GO 0000726 | non-recombinational repair                                             | BP | 74  | 18 | 0 0401955  |

|            |                                                                    |    |    |    |            |
|------------|--------------------------------------------------------------------|----|----|----|------------|
| GO 0140029 | exocytic process                                                   | BP | 52 | 17 | 0 00213018 |
| GO 0032507 | maintenance of protein location in cell                            | BP | 57 | 17 | 0 00616686 |
| GO 0044264 | cellular polysaccharide metabolic process                          | BP | 58 | 17 | 0 00745636 |
| GO 0048010 | vascular endothelial growth factor receptor signaling pathway      | BP | 60 | 17 | 0 01068288 |
| GO 0032436 | positive regulation of proteasomal ubiquitin-dependent protein cat | BP | 65 | 17 | 0 02361802 |
| GO 0006303 | double-strand break repair via nonhomologous end joining           | BP | 69 | 17 | 0 04055493 |
| GO 0015749 | monosaccharide transmembrane transport                             | BP | 55 | 16 | 0 01002027 |
| GO 0034219 | carbohydrate transmembrane transport                               | BP | 56 | 16 | 0 01200272 |
| GO 0098693 | regulation of synaptic vesicle cycle                               | BP | 58 | 16 | 0 01687966 |
| GO 0021782 | glial cell development                                             | BP | 59 | 16 | 0 01982866 |
| GO 0002702 | positive regulation of production of molecular mediator of immune  | BP | 61 | 16 | 0 02688374 |
| GO 0070317 | negative regulation of G0 to G1 transition                         | BP | 35 | 15 | 0 00014035 |
| GO 0070316 | regulation of G0 to G1 transition                                  | BP | 38 | 15 | 0 00041611 |
| GO 0045023 | G0 to G1 transition                                                | BP | 39 | 15 | 0 00057752 |
| GO 0070830 | bicellular tight junction assembly                                 | BP | 45 | 15 | 0 00308641 |
| GO 0120192 | tight junction assembly                                            | BP | 46 | 15 | 0 00391655 |
| GO 0120193 | tight junction organization                                        | BP | 47 | 15 | 0 00492028 |
| GO 0048278 | vesicle docking                                                    | BP | 51 | 15 | 0 01119579 |
| GO 1904659 | glucose transmembrane transport                                    | BP | 52 | 15 | 0 01347265 |
| GO 0008645 | hexose transmembrane transport                                     | BP | 54 | 15 | 0 01908808 |
| GO 0044786 | cell cycle DNA replication                                         | BP | 56 | 15 | 0 02632477 |
| GO 0046785 | microtubule polymerization                                         | BP | 58 | 15 | 0 03542181 |
| GO 0010827 | regulation of glucose transmembrane transport                      | BP | 41 | 14 | 0 00326732 |
| GO 0016445 | somatic diversification of immunoglobulins                         | BP | 41 | 14 | 0 00326732 |
| GO 1901880 | negative regulation of protein depolymerization                    | BP | 42 | 14 | 0 00419417 |
| GO 0007080 | mitotic metaphase plate congression                                | BP | 44 | 14 | 0 0066843  |
| GO 0043242 | negative regulation of protein complex disassembly                 | BP | 46 | 14 | 0 01023092 |
| GO 0006112 | energy reserve metabolic process                                   | BP | 46 | 14 | 0 01023092 |
| GO 0051781 | positive regulation of cell division                               | BP | 46 | 14 | 0 01023092 |
| GO 0002200 | somatic diversification of immune receptors                        | BP | 46 | 14 | 0 01023092 |
| GO 2000177 | regulation of neural precursor cell proliferation                  | BP | 50 | 14 | 0 02158255 |
| GO 0006220 | pyrimidine nucleotide metabolic process                            | BP | 51 | 14 | 0 02551267 |
| GO 0031110 | regulation of microtubule polymerization or depolymerization       | BP | 53 | 14 | 0 0349222  |
| GO 0051310 | metaphase plate congression                                        | BP | 53 | 14 | 0 0349222  |
| GO 0051702 | interaction with symbiont                                          | BP | 54 | 14 | 0 04046414 |
| GO 1901216 | positive regulation of neuron death                                | BP | 55 | 14 | 0 04660216 |
| GO 0062014 | negative regulation of small molecule metabolic process            | BP | 55 | 14 | 0 04660216 |
| GO 0021885 | forebrain cell migration                                           | BP | 35 | 13 | 0 00192984 |
| GO 0008156 | negative regulation of DNA replication                             | BP | 36 | 13 | 0 00258586 |
| GO 0006221 | pyrimidine nucleotide biosynthetic process                         | BP | 38 | 13 | 0 00444378 |
| GO 0005977 | glycogen metabolic process                                         | BP | 42 | 13 | 0 01129528 |
| GO 0006073 | cellular glucan metabolic process                                  | BP | 42 | 13 | 0 01129528 |
| GO 0044042 | glucan metabolic process                                           | BP | 42 | 13 | 0 01129528 |
| GO 0002011 | morphogenesis of an epithelial sheet                               | BP | 42 | 13 | 0 01129528 |
| GO 0034724 | DNA replication-independent nucleosome organization                | BP | 43 | 13 | 0 01388318 |
| GO 0034508 | centromere complex assembly                                        | BP | 44 | 13 | 0 01690206 |
| GO 0007062 | sister chromatid cohesion                                          | BP | 47 | 13 | 0 02895082 |
| GO 0072528 | pyrimidine-containing compound biosynthetic process                | BP | 47 | 13 | 0 02895082 |
| GO 0021766 | hippocampus development                                            | BP | 48 | 13 | 0 0340942  |
| GO 0002753 | cytoplasmic pattern recognition receptor signaling pathway         | BP | 48 | 13 | 0 0340942  |
| GO 0014812 | muscle cell migration                                              | BP | 49 | 13 | 0 03986109 |
| GO 0046928 | regulation of neurotransmitter secretion                           | BP | 49 | 13 | 0 03986109 |
| GO 1904377 | positive regulation of protein localization to cell periphery      | BP | 49 | 13 | 0 03986109 |
| GO 0017158 | regulation of calcium ion-dependent exocytosis                     | BP | 50 | 13 | 0 04628328 |
| GO 0051851 | modification by host of symbiont morphology or physiology          | BP | 50 | 13 | 0 04628328 |
| GO 0000245 | spliceosomal complex assembly                                      | BP | 50 | 13 | 0 04628328 |
| GO 0016447 | somatic recombination of immunoglobulin gene segments              | BP | 34 | 12 | 0 00464143 |
| GO 0006904 | vesicle docking involved in exocytosis                             | BP | 35 | 12 | 0 00605617 |
| GO 0033627 | cell adhesion mediated by integrin                                 | BP | 39 | 12 | 0 01538413 |
| GO 0002562 | somatic diversification of immune receptors via germline recombina | BP | 39 | 12 | 0 01538413 |
| GO 0016444 | somatic cell DNA recombination                                     | BP | 39 | 12 | 0 01538413 |
| GO 0021954 | central nervous system neuron development                          | BP | 40 | 12 | 0 01887071 |
| GO 0031122 | cytoplasmic microtubule organization                               | BP | 41 | 12 | 0 02291488 |
| GO 0006336 | DNA replication-independent nucleosome assembly                    | BP | 42 | 12 | 0 02756272 |
| GO 0019083 | viral transcription                                                | BP | 42 | 12 | 0 02756272 |
| GO 0043627 | response to estrogen                                               | BP | 43 | 12 | 0 03285803 |
| GO 1901224 | positive regulation of N K/NF-kappaB signaling                     | BP | 44 | 12 | 0 03884151 |
| GO 0038095 | Fc-epsilon receptor signaling pathway                              | BP | 45 | 12 | 0 04555009 |
| GO 0034067 | protein localization to Golgi apparatus                            | BP | 24 | 11 | 0 00054633 |
| GO 0046323 | glucose import                                                     | BP | 33 | 11 | 0 01065823 |
| GO 0022029 | telencephalon cell migration                                       | BP | 33 | 11 | 0 01065823 |
| GO 0002381 | immunoglobulin production involved in immunoglobulin mediated i    | BP | 33 | 11 | 0 01065823 |
| GO 0030042 | actin filament depolymerization                                    | BP | 34 | 11 | 0 01353582 |
| GO 0046626 | regulation of insulin receptor signaling pathway                   | BP | 34 | 11 | 0 01353582 |
| GO 0051058 | negative regulation of small GTPase mediated signal transduction   | BP | 35 | 11 | 0 016964   |
| GO 0045840 | positive regulation of mitotic nuclear division                    | BP | 35 | 11 | 0 016964   |
| GO 0018023 | peptidyl-lysine trimethylation                                     | BP | 36 | 11 | 0 02099998 |
| GO 1900076 | regulation of cellular response to insulin stimulus                | BP | 36 | 11 | 0 02099998 |
| GO 0031055 | chromatin remodeling at centromere                                 | BP | 36 | 11 | 0 02099998 |
| GO 0002042 | cell migration involved in sprouting angiogenesis                  | BP | 38 | 11 | 0 03111435 |
| GO 0071385 | cellular response to glucocorticoid stimulus                       | BP | 38 | 11 | 0 03111435 |
| GO 2000300 | regulation of synaptic vesicle exocytosis                          | BP | 39 | 11 | 0 03729408 |
| GO 0046782 | regulation of viral transcription                                  | BP | 39 | 11 | 0 03729408 |
| GO 0043266 | regulation of potassium ion transport                              | BP | 40 | 11 | 0 04428225 |
| GO 0051568 | histone H3-K4 methylation                                          | BP | 40 | 11 | 0 04428225 |

|            |                                                                    |    |    |    |            |
|------------|--------------------------------------------------------------------|----|----|----|------------|
| GO 0043486 | histone exchange                                                   | BP | 40 | 11 | 0 04428225 |
| GO 0051383 | kinetochore organization                                           | BP | 21 | 10 | 0 00067363 |
| GO 0021795 | cerebral cortex cell migration                                     | BP | 27 | 10 | 0 00645798 |
| GO 0007019 | microtubule depolymerization                                       | BP | 28 | 10 | 0 00863555 |
| GO 0046324 | regulation of glucose import                                       | BP | 29 | 10 | 0 01133415 |
| GO 0002204 | somatic recombination of immunoglobulin genes involved in immun    | BP | 31 | 10 | 0 01857752 |
| GO 0002208 | somatic diversification of immunoglobulins involved in immune resp | BP | 31 | 10 | 0 01857752 |
| GO 0045190 | isotype switching                                                  | BP | 31 | 10 | 0 01857752 |
| GO 0030834 | regulation of actin filament depolymerization                      | BP | 32 | 10 | 0 02326124 |
| GO 0034080 | CENP-A containing nucleosome assembly                              | BP | 32 | 10 | 0 02326124 |
| GO 0061641 | CENP-A containing chromatin organization                           | BP | 32 | 10 | 0 02326124 |
| GO 0007405 | neuroblast proliferation                                           | BP | 33 | 10 | 0 02874082 |
| GO 0072595 | maintenance of protein localization in organelle                   | BP | 34 | 10 | 0 03507623 |
| GO 0043954 | cellular component maintenance                                     | BP | 34 | 10 | 0 03507623 |
| GO 0043525 | positive regulation of neuron apoptotic process                    | BP | 35 | 10 | 0 04232112 |
| GO 0045880 | positive regulation of smoothed signaling pathway                  | BP | 19 | 9  | 0 00131836 |
| GO 0007435 | salivary gland morphogenesis                                       | BP | 22 | 9  | 0 00451351 |
| GO 0030835 | negative regulation of actin filament depolymerization             | BP | 24 | 9  | 0 00878819 |
| GO 0007431 | salivary gland development                                         | BP | 24 | 9  | 0 00878819 |
| GO 0051642 | centrosome localization                                            | BP | 24 | 9  | 0 00878819 |
| GO 0061842 | microtubule organizing center localization                         | BP | 25 | 9  | 0 01182494 |
| GO 0070423 | nucleotide-binding oligomerization domain containing signaling pa  | BP | 26 | 9  | 0 01558017 |
| GO 0046579 | positive regulation of Ras protein signal transduction             | BP | 26 | 9  | 0 01558017 |
| GO 0006298 | mismatch repair                                                    | BP | 27 | 9  | 0 02014127 |
| GO 0035872 | nucleotide-binding domain leucine rich repeat containing recepto   | BP | 27 | 9  | 0 02014127 |
| GO 0033173 | calcineurin-NFAT signaling cascade                                 | BP | 27 | 9  | 0 02014127 |
| GO 0097720 | calcineurin-mediated signaling                                     | BP | 27 | 9  | 0 02014127 |
| GO 0045910 | negative regulation of DNA recombination                           | BP | 27 | 9  | 0 02014127 |
| GO 0051984 | positive regulation of chromosome segregation                      | BP | 27 | 9  | 0 02014127 |
| GO 2000179 | positive regulation of neural precursor cell proliferation         | BP | 27 | 9  | 0 02014127 |
| GO 0043276 | anoikis                                                            | BP | 28 | 9  | 0 02559135 |
| GO 0051057 | positive regulation of small GTPase mediated signal transduction   | BP | 29 | 9  | 0 03200708 |
| GO 0007099 | centriole replication                                              | BP | 29 | 9  | 0 03200708 |
| GO 0097300 | programmed necrotic cell death                                     | BP | 30 | 9  | 0 0394567  |
| GO 0035272 | exocrine system development                                        | BP | 30 | 9  | 0 0394567  |
| GO 0045103 | intermediate filament-based process                                | BP | 30 | 9  | 0 0394567  |
| GO 0045104 | intermediate filament cytoskeleton organization                    | BP | 30 | 9  | 0 0394567  |
| GO 0098534 | centriole assembly                                                 | BP | 30 | 9  | 0 0394567  |
| GO 0051898 | negative regulation of protein kinase B signaling                  | BP | 31 | 9  | 0 04799818 |
| GO 1901985 | positive regulation of protein acetylation                         | BP | 31 | 9  | 0 04799818 |
| GO 0062033 | positive regulation of mitotic sister chromatid segregation        | BP | 17 | 8  | 0 00259137 |
| GO 0000729 | DNA double-strand break processing                                 | BP | 20 | 8  | 0 0085967  |
| GO 0021955 | central nervous system neuron axonogenesis                         | BP | 20 | 8  | 0 0085967  |
| GO 0051693 | actin filament capping                                             | BP | 22 | 8  | 0 0162449  |
| GO 2000781 | positive regulation of double-strand break repair                  | BP | 22 | 8  | 0 0162449  |
| GO 0032467 | positive regulation of cytokinesis                                 | BP | 23 | 8  | 0 02150582 |
| GO 0050919 | negative chemotaxis                                                | BP | 23 | 8  | 0 02150582 |
| GO 0014009 | glial cell proliferation                                           | BP | 23 | 8  | 0 02150582 |
| GO 0033014 | tetrapyrrole biosynthetic process                                  | BP | 24 | 8  | 0 02786463 |
| GO 0090504 | epiboly                                                            | BP | 24 | 8  | 0 02786463 |
| GO 0045191 | regulation of isotype switching                                    | BP | 24 | 8  | 0 02786463 |
| GO 0090169 | regulation of spindle assembly                                     | BP | 24 | 8  | 0 02786463 |
| GO 0046039 | GTP metabolic process                                              | BP | 25 | 8  | 0 03541272 |
| GO 2000758 | positive regulation of peptidyl-lysine acetylation                 | BP | 25 | 8  | 0 03541272 |
| GO 0001953 | negative regulation of cell-matrix adhesion                        | BP | 26 | 8  | 0 04422719 |
| GO 0031111 | negative regulation of microtubule polymerization or depolymeriza  | BP | 26 | 8  | 0 04422719 |
| GO 0044818 | mitotic G2/M transition checkpoint                                 | BP | 26 | 8  | 0 04422719 |
| GO 0017145 | stem cell division                                                 | BP | 26 | 8  | 0 04422719 |
| GO 0002931 | response to ischemia                                               | BP | 26 | 8  | 0 04422719 |
| GO 0051016 | barbed-end actin filament capping                                  | BP | 15 | 7  | 0 00512114 |
| GO 0070050 | neuron cellular homeostasis                                        | BP | 15 | 7  | 0 00512114 |
| GO 1904385 | cellular response to angiotensin                                   | BP | 16 | 7  | 0 00786519 |
| GO 1901685 | glutathione derivative metabolic process                           | BP | 16 | 7  | 0 00786519 |
| GO 1901687 | glutathione derivative biosynthetic process                        | BP | 16 | 7  | 0 00786519 |
| GO 0034643 | establishment of mitochondrion localization microtubule-mediated   | BP | 16 | 7  | 0 00786519 |
| GO 0047497 | mitochondrion transport along microtubule                          | BP | 16 | 7  | 0 00786519 |
| GO 0090322 | regulation of superoxide metabolic process                         | BP | 17 | 7  | 0 01155686 |
| GO 0071514 | genetic imprinting                                                 | BP | 17 | 7  | 0 01155686 |
| GO 1901673 | regulation of mitotic spindle assembly                             | BP | 17 | 7  | 0 01155686 |
| GO 2000209 | regulation of anoikis                                              | BP | 18 | 7  | 0 01635402 |
| GO 1990776 | response to angiotensin                                            | BP | 18 | 7  | 0 01635402 |
| GO 0051654 | establishment of mitochondrion localization                        | BP | 18 | 7  | 0 01635402 |
| GO 0060706 | cell differentiation involved in embryonic placenta development    | BP | 19 | 7  | 0 02240425 |
| GO 0034453 | microtubule anchoring                                              | BP | 19 | 7  | 0 02240425 |
| GO 0046627 | negative regulation of insulin receptor signaling pathway          | BP | 19 | 7  | 0 02240425 |
| GO 1900077 | negative regulation of cellular response to insulin stimulus       | BP | 19 | 7  | 0 02240425 |
| GO 0045830 | positive regulation of isotype switching                           | BP | 20 | 7  | 0 02983908 |
| GO 0032885 | regulation of polysaccharide biosynthetic process                  | BP | 21 | 7  | 0 03876916 |
| GO 0033028 | myeloid cell apoptotic process                                     | BP | 21 | 7  | 0 03876916 |
| GO 0007064 | mitotic sister chromatid cohesion                                  | BP | 21 | 7  | 0 03876916 |
| GO 2000404 | regulation of T cell migration                                     | BP | 22 | 7  | 0 04928048 |
| GO 0071549 | cellular response to dexamethasone stimulus                        | BP | 22 | 7  | 0 04928048 |
| GO 0051567 | histone H3-K9 methylation                                          | BP | 22 | 7  | 0 04928048 |
| GO 0043921 | modulation by host of viral transcription                          | BP | 22 | 7  | 0 04928048 |
| GO 0052472 | modulation by host of symbiont transcription                       | BP | 22 | 7  | 0 04928048 |

|            |                                                                      |    |    |   |            |
|------------|----------------------------------------------------------------------|----|----|---|------------|
| GO 0051095 | regulation of helicase activity                                      | BP | 12 | 6 | 0 00633276 |
| GO 0051315 | attachment of mitotic spindle microtubules to kinetochore            | BP | 13 | 6 | 0 01019016 |
| GO 0035313 | wound healing spreading of epidermal cells                           | BP | 13 | 6 | 0 01019016 |
| GO 0008356 | asymmetric cell division                                             | BP | 13 | 6 | 0 01019016 |
| GO 0001990 | regulation of systemic arterial blood pressure by hormone            | BP | 14 | 6 | 0 01546045 |
| GO 0035024 | negative regulation of Rho protein signal transduction               | BP | 14 | 6 | 0 01546045 |
| GO 0060972 | left/right pattern formation                                         | BP | 14 | 6 | 0 01546045 |
| GO 0001945 | lymph vessel development                                             | BP | 15 | 6 | 0 02235333 |
| GO 0031468 | nuclear envelope reassembly                                          | BP | 15 | 6 | 0 02235333 |
| GO 1900181 | negative regulation of protein localization to nucleus               | BP | 15 | 6 | 0 02235333 |
| GO 0051385 | response to mineralocorticoid                                        | BP | 16 | 6 | 0 03104621 |
| GO 0005979 | regulation of glycogen biosynthetic process                          | BP | 16 | 6 | 0 03104621 |
| GO 0010962 | regulation of glucan biosynthetic process                            | BP | 16 | 6 | 0 03104621 |
| GO 0070828 | heterochromatin organization                                         | BP | 16 | 6 | 0 03104621 |
| GO 0051382 | kinetochore assembly                                                 | BP | 16 | 6 | 0 03104621 |
| GO 0031338 | regulation of vesicle fusion                                         | BP | 17 | 6 | 0 04167676 |
| GO 1901522 | positive regulation of transcription from RNA polymerase promot      | BP | 17 | 6 | 0 04167676 |
| GO 0046794 | transport of virus                                                   | BP | 17 | 6 | 0 04167676 |
| GO 0070493 | thrombin-activated receptor signaling pathway                        | BP | 7  | 5 | 0 00162755 |
| GO 0051096 | positive regulation of helicase activity                             | BP | 7  | 5 | 0 00162755 |
| GO 0034085 | establishment of sister chromatid cohesion                           | BP | 8  | 5 | 0 00376941 |
| GO 0050901 | leukocyte tethering or rolling                                       | BP | 9  | 5 | 0 00737104 |
| GO 0071801 | regulation of podosome assembly                                      | BP | 9  | 5 | 0 00737104 |
| GO 0034770 | histone H4-K20 methylation                                           | BP | 9  | 5 | 0 00737104 |
| GO 0090343 | positive regulation of cell aging                                    | BP | 9  | 5 | 0 00737104 |
| GO 0051482 | positive regulation of cytosolic calcium ion concentration involved  | BP | 9  | 5 | 0 00737104 |
| GO 0035520 | monoubiquitinated protein deubiquitination                           | BP | 9  | 5 | 0 00737104 |
| GO 0003081 | regulation of systemic arterial blood pressure by renin-angiotensin  | BP | 10 | 5 | 0 0128216  |
| GO 0010560 | positive regulation of glycoprotein biosynthetic process             | BP | 10 | 5 | 0 0128216  |
| GO 0006241 | CTP biosynthetic process                                             | BP | 10 | 5 | 0 0128216  |
| GO 0046036 | CTP metabolic process                                                | BP | 10 | 5 | 0 0128216  |
| GO 0046628 | positive regulation of insulin receptor signaling pathway            | BP | 10 | 5 | 0 0128216  |
| GO 0010842 | retina layer formation                                               | BP | 10 | 5 | 0 0128216  |
| GO 0006349 | regulation of gene expression by genetic imprinting                  | BP | 11 | 5 | 0 02045912 |
| GO 0009209 | pyrimidine ribonucleoside triphosphate biosynthetic process          | BP | 11 | 5 | 0 02045912 |
| GO 0016024 | CDP-diacylglycerol biosynthetic process                              | BP | 11 | 5 | 0 02045912 |
| GO 0007100 | mitotic centrosome separation                                        | BP | 11 | 5 | 0 02045912 |
| GO 1903020 | positive regulation of glycoprotein metabolic process                | BP | 11 | 5 | 0 02045912 |
| GO 0006983 | ER overload response                                                 | BP | 11 | 5 | 0 02045912 |
| GO 0090161 | Golgi ribbon formation                                               | BP | 11 | 5 | 0 02045912 |
| GO 0035437 | maintenance of protein localization in endoplasmic reticulum         | BP | 11 | 5 | 0 02045912 |
| GO 0061756 | leukocyte adhesion to vascular endothelial cell                      | BP | 12 | 5 | 0 03054939 |
| GO 0003071 | renal system process involved in regulation of systemic arterial blo | BP | 12 | 5 | 0 03054939 |
| GO 0071800 | podosome assembly                                                    | BP | 12 | 5 | 0 03054939 |
| GO 0034086 | maintenance of sister chromatid cohesion                             | BP | 12 | 5 | 0 03054939 |
| GO 0034088 | maintenance of mitotic sister chromatid cohesion                     | BP | 12 | 5 | 0 03054939 |
| GO 0009208 | pyrimidine ribonucleoside triphosphate metabolic process             | BP | 12 | 5 | 0 03054939 |
| GO 0046341 | CDP-diacylglycerol metabolic process                                 | BP | 12 | 5 | 0 03054939 |
| GO 0051299 | centrosome separation                                                | BP | 12 | 5 | 0 03054939 |
| GO 1900078 | positive regulation of cellular response to insulin stimulus         | BP | 12 | 5 | 0 03054939 |
| GO 0002566 | somatic diversification of immune receptors via somatic mutation     | BP | 12 | 5 | 0 03054939 |
| GO 0016446 | somatic hypermutation of immunoglobulin genes                        | BP | 12 | 5 | 0 03054939 |
| GO 0045777 | positive regulation of blood pressure                                | BP | 13 | 5 | 0 0432739  |
| GO 2000811 | negative regulation of anoikis                                       | BP | 13 | 5 | 0 0432739  |
| GO 0032486 | Rap protein signal transduction                                      | BP | 13 | 5 | 0 0432739  |
| GO 0080182 | histone H3-K4 trimethylation                                         | BP | 13 | 5 | 0 0432739  |
| GO 0032232 | negative regulation of actin filament bundle assembly                | BP | 13 | 5 | 0 0432739  |
| GO 0051497 | negative regulation of stress fiber assembly                         | BP | 13 | 5 | 0 0432739  |
| GO 2000042 | negative regulation of double-strand break repair via homologous     | BP | 13 | 5 | 0 0432739  |
| GO 0003084 | positive regulation of systemic arterial blood pressure              | BP | 5  | 4 | 0 00282041 |
| GO 1903251 | multi-ciliated epithelial cell differentiation                       | BP | 5  | 4 | 0 00282041 |
| GO 0045719 | negative regulation of glycogen biosynthetic process                 | BP | 5  | 4 | 0 00282041 |
| GO 0070874 | negative regulation of glycogen metabolic process                    | BP | 5  | 4 | 0 00282041 |
| GO 0043570 | maintenance of DNA repeat elements                                   | BP | 5  | 4 | 0 00282041 |
| GO 0048172 | regulation of short-term neuronal synaptic plasticity                | BP | 5  | 4 | 0 00282041 |
| GO 0071921 | cohesin loading                                                      | BP | 6  | 4 | 0 00738968 |
| GO 1905634 | regulation of protein localization to chromatin                      | BP | 6  | 4 | 0 00738968 |
| GO 0044359 | modulation of molecular function in other organism                   | BP | 7  | 4 | 0 01507252 |
| GO 0052205 | modulation of molecular function in other organism involved in syn   | BP | 7  | 4 | 0 01507252 |
| GO 0097709 | connective tissue replacement                                        | BP | 7  | 4 | 0 01507252 |
| GO 0036462 | TRA L-activated apoptotic signaling pathway                          | BP | 8  | 4 | 0 02637563 |
| GO 0060707 | trophoblast giant cell differentiation                               | BP | 8  | 4 | 0 02637563 |
| GO 0060253 | negative regulation of glial cell proliferation                      | BP | 8  | 4 | 0 02637563 |
| GO 2000774 | positive regulation of cellular senescence                           | BP | 8  | 4 | 0 02637563 |
| GO 0006621 | protein retention in ER lumen                                        | BP | 8  | 4 | 0 02637563 |
| GO 0019896 | axonal transport of mitochondrion                                    | BP | 8  | 4 | 0 02637563 |
| GO 0099640 | axo-dendritic protein transport                                      | BP | 8  | 4 | 0 02637563 |
| GO 0006013 | mannose metabolic process                                            | BP | 8  | 4 | 0 02637563 |
| GO 0051657 | maintenance of organelle location                                    | BP | 8  | 4 | 0 02637563 |
| GO 0051451 | myoblast migration                                                   | BP | 9  | 4 | 0 0415793  |
| GO 0043619 | regulation of transcription from RNA polymerase promoter in res      | BP | 9  | 4 | 0 0415793  |
| GO 0051412 | response to corticosterone                                           | BP | 9  | 4 | 0 0415793  |
| GO 0032530 | regulation of microvillus organization                               | BP | 9  | 4 | 0 0415793  |
| GO 0042532 | negative regulation of tyrosine phosphorylation of STAT protein      | BP | 9  | 4 | 0 0415793  |
| GO 0060307 | regulation of ventricular cardiac muscle cell membrane repolarizati  | BP | 9  | 4 | 0 0415793  |

|            |                                                                       |    |       |      |            |
|------------|-----------------------------------------------------------------------|----|-------|------|------------|
| GO 0071888 | macrophage apoptotic process                                          | BP | 9     | 4    | 0 0415793  |
| GO 0043922 | negative regulation by host of viral transcription                    | BP | 9     | 4    | 0 0415793  |
| GO 0018026 | peptidyl-lysine monomethylation                                       | BP | 9     | 4    | 0 0415793  |
| GO 0035385 | Roundabout signaling pathway                                          | BP | 3     | 3    | 0 00405706 |
| GO 0000710 | meiotic mismatch repair                                               | BP | 3     | 3    | 0 00405706 |
| GO 2000465 | regulation of glycogen (starch) synthase activity                     | BP | 3     | 3    | 0 00405706 |
| GO 2000466 | negative regulation of glycogen (starch) synthase activity            | BP | 3     | 3    | 0 00405706 |
| GO 0097742 | de novo centriole assembly                                            | BP | 3     | 3    | 0 00405706 |
| GO 0098535 | de novo centriole assembly involved in multi-ciliated epithelial cell | BP | 3     | 3    | 0 00405706 |
| GO 0010269 | response to selenium ion                                              | BP | 4     | 3    | 0 0142889  |
| GO 0090324 | negative regulation of oxidative phosphorylation                      | BP | 4     | 3    | 0 0142889  |
| GO 0099509 | regulation of presynaptic cytosolic calcium ion concentration         | BP | 4     | 3    | 0 0142889  |
| GO 2000675 | negative regulation of type B pancreatic cell apoptotic process       | BP | 4     | 3    | 0 0142889  |
| GO 0007079 | mitotic chromosome movement towards spindle pole                      | BP | 4     | 3    | 0 0142889  |
| GO 0031033 | myosin filament organization                                          | BP | 4     | 3    | 0 0142889  |
| GO 0048625 | myoblast fate commitment                                              | BP | 4     | 3    | 0 0142889  |
| GO 0061072 | iris morphogenesis                                                    | BP | 4     | 3    | 0 0142889  |
| GO 1903912 | negative regulation of endoplasmic reticulum stress-induced e F2      | BP | 4     | 3    | 0 0142889  |
| GO 1903373 | positive regulation of endoplasmic reticulum tubular network organ    | BP | 4     | 3    | 0 0142889  |
| GO 0006102 | isocitrate metabolic process                                          | BP | 5     | 3    | 0 03149163 |
| GO 0052428 | modulation by host of symbiont molecular function                     | BP | 5     | 3    | 0 03149163 |
| GO 0018197 | peptidyl-aspartic acid modification                                   | BP | 5     | 3    | 0 03149163 |
| GO 0098915 | membrane repolarization during ventricular cardiac muscle cell act    | BP | 5     | 3    | 0 03149163 |
| GO 0015014 | heparan sulfate proteoglycan biosynthetic process polysaccharid       | BP | 5     | 3    | 0 03149163 |
| GO 0061419 | positive regulation of transcription from RNA polymerase promot       | BP | 5     | 3    | 0 03149163 |
| GO 0048853 | forebrain morphogenesis                                               | BP | 5     | 3    | 0 03149163 |
| GO 0014010 | Schwann cell proliferation                                            | BP | 5     | 3    | 0 03149163 |
| GO 0000920 | septum digestion after cytokinesis                                    | BP | 5     | 3    | 0 03149163 |
| GO 0071922 | regulation of cohesin loading                                         | BP | 5     | 3    | 0 03149163 |
| GO 0021800 | cerebral cortex tangential migration                                  | BP | 5     | 3    | 0 03149163 |
| GO 0042796 | snRNA transcription by RNA polymerase                                 | BP | 5     | 3    | 0 03149163 |
| GO 0045053 | protein retention in Golgi apparatus                                  | BP | 5     | 3    | 0 03149163 |
| GO 1903722 | regulation of centriole elongation                                    | BP | 5     | 3    | 0 03149163 |
| GO 0034093 | positive regulation of maintenance of sister chromatid cohesion       | BP | 5     | 3    | 0 03149163 |
| GO 0034184 | positive regulation of maintenance of mitotic sister chromatid cohe   | BP | 5     | 3    | 0 03149163 |
| GO 1903371 | regulation of endoplasmic reticulum tubular network organization      | BP | 5     | 3    | 0 03149163 |
| GO 0043366 | beta selection                                                        | BP | 2     | 2    | 0 02544967 |
| GO 0071386 | cellular response to corticosterone stimulus                          | BP | 2     | 2    | 0 02544967 |
| GO 0021502 | neural fold elevation formation                                       | BP | 2     | 2    | 0 02544967 |
| GO 2000620 | positive regulation of histone H4-K16 acetylation                     | BP | 2     | 2    | 0 02544967 |
| GO 0052203 | modulation of catalytic activity in other organism involved in symbi  | BP | 2     | 2    | 0 02544967 |
| GO 1905123 | regulation of glucosylceramidase activity                             | BP | 2     | 2    | 0 02544967 |
| GO 0008228 | opsonization                                                          | BP | 2     | 2    | 0 02544967 |
| GO 1904124 | microglial cell migration                                             | BP | 2     | 2    | 0 02544967 |
| GO 1904139 | regulation of microglial cell migration                               | BP | 2     | 2    | 0 02544967 |
| GO 1904141 | positive regulation of microglial cell migration                      | BP | 2     | 2    | 0 02544967 |
| GO 0021523 | somatic motor neuron differentiation                                  | BP | 2     | 2    | 0 02544967 |
| GO 1900133 | regulation of renin secretion into blood stream                       | BP | 2     | 2    | 0 02544967 |
| GO 2000077 | negative regulation of type B pancreatic cell development             | BP | 2     | 2    | 0 02544967 |
| GO 0001766 | membrane raft polarization                                            | BP | 2     | 2    | 0 02544967 |
| GO 0031580 | membrane raft distribution                                            | BP | 2     | 2    | 0 02544967 |
| GO 0006097 | glyoxylate cycle                                                      | BP | 2     | 2    | 0 02544967 |
| GO 0038165 | oncostatin-M-mediated signaling pathway                               | BP | 2     | 2    | 0 02544967 |
| GO 0048861 | leukemia inhibitory factor signaling pathway                          | BP | 2     | 2    | 0 02544967 |
| GO 1905150 | regulation of voltage-gated sodium channel activity                   | BP | 2     | 2    | 0 02544967 |
| GO 0075732 | viral penetration into host nucleus                                   | BP | 2     | 2    | 0 02544967 |
| GO 1902594 | multi-organism nuclear import                                         | BP | 2     | 2    | 0 02544967 |
| GO 0043000 | Golgi to plasma membrane CFTR protein transport                       | BP | 2     | 2    | 0 02544967 |
| GO 0070494 | regulation of thrombin-activated receptor signaling pathway           | BP | 2     | 2    | 0 02544967 |
| GO 0070495 | negative regulation of thrombin-activated receptor signaling pathw    | BP | 2     | 2    | 0 02544967 |
| GO 0045105 | intermediate filament polymerization or depolymerization              | BP | 2     | 2    | 0 02544967 |
| GO 0043385 | mycotoxin metabolic process                                           | BP | 2     | 2    | 0 02544967 |
| GO 0043387 | mycotoxin catabolic process                                           | BP | 2     | 2    | 0 02544967 |
| GO 0046222 | aflatoxin metabolic process                                           | BP | 2     | 2    | 0 02544967 |
| GO 0046223 | aflatoxin catabolic process                                           | BP | 2     | 2    | 0 02544967 |
| GO 1901376 | organic heteropentacyclic compound metabolic process                  | BP | 2     | 2    | 0 02544967 |
| GO 1901377 | organic heteropentacyclic compound catabolic process                  | BP | 2     | 2    | 0 02544967 |
| GO 0019541 | propionate metabolic process                                          | BP | 2     | 2    | 0 02544967 |
| GO 0014040 | positive regulation of Schwann cell differentiation                   | BP | 2     | 2    | 0 02544967 |
| GO 0090618 | DNA clamp unloading                                                   | BP | 2     | 2    | 0 02544967 |
| GO 0000350 | generation of catalytic spliceosome for second transesterification s  | BP | 2     | 2    | 0 02544967 |
| GO 1990116 | ribosome-associated ubiquitin-dependent protein catabolic proces      | BP | 2     | 2    | 0 02544967 |
| GO 0061709 | reticulophagy                                                         | BP | 2     | 2    | 0 02544967 |
| GO 0006548 | histidine catabolic process                                           | BP | 2     | 2    | 0 02544967 |
| GO 0052805 | imidazole-containing compound catabolic process                       | BP | 2     | 2    | 0 02544967 |
| GO 0034087 | establishment of mitotic sister chromatid cohesion                    | BP | 2     | 2    | 0 02544967 |
| GO 0060382 | regulation of DNA strand elongation                                   | BP | 2     | 2    | 0 02544967 |
| GO 0032472 | Golgi calcium ion transport                                           | BP | 2     | 2    | 0 02544967 |
| GO 0042144 | vacuole fusion non-autophagic                                         | BP | 2     | 2    | 0 02544967 |
| GO 0097576 | vacuole fusion                                                        | BP | 2     | 2    | 0 02544967 |
| GO 0048250 | iron import into the mitochondrion                                    | BP | 2     | 2    | 0 02544967 |
| GO 1990166 | protein localization to site of double-strand break                   | BP | 2     | 2    | 0 02544967 |
| GO 0005575 | cellular component                                                    | CC | 10123 | 1662 | 1 96E-06   |
| GO 0005623 | cell                                                                  | CC | 9668  | 1601 | 9 93E-07   |
| GO 0044464 | cell part                                                             | CC | 9659  | 1599 | 1 36E-06   |

|            |                                              |    |      |      |            |
|------------|----------------------------------------------|----|------|------|------------|
| GO 0005622 | intracellular                                | CC | 9233 | 1552 | 5 38E-09   |
| GO 0044424 | intracellular part                           | CC | 9136 | 1540 | 2 58E-09   |
| GO 0043226 | organelle                                    | CC | 8520 | 1461 | 5 47E-11   |
| GO 0043229 | intracellular organelle                      | CC | 8194 | 1411 | 1 66E-10   |
| GO 0043227 | membrane-bounded organelle                   | CC | 8057 | 1366 | 9 54E-07   |
| GO 0005737 | cytoplasm                                    | CC | 7500 | 1269 | 2 63E-05   |
| GO 0043231 | intracellular membrane-bounded organelle     | CC | 7343 | 1254 | 2 54E-06   |
| GO 0044422 | organelle part                               | CC | 6571 | 1139 | 7 82E-07   |
| GO 0044446 | intracellular organelle part                 | CC | 6482 | 1129 | 2 71E-07   |
| GO 0044444 | cytoplasmic part                             | CC | 6503 | 1099 | 0 00061742 |
| GO 0005634 | nucleus                                      | CC | 5046 | 908  | 4 76E-08   |
| GO 0031974 | membrane-enclosed lumen                      | CC | 3991 | 712  | 2 93E-05   |
| GO 0043233 | organelle lumen                              | CC | 3991 | 712  | 2 93E-05   |
| GO 0070013 | intracellular organelle lumen                | CC | 3991 | 712  | 2 93E-05   |
| GO 0005829 | cytosol                                      | CC | 3779 | 684  | 5 95E-06   |
| GO 0044428 | nuclear part                                 | CC | 3501 | 650  | 2 50E-07   |
| GO 0032991 | protein-containing complex                   | CC | 3721 | 649  | 0 00136376 |
| GO 0031981 | nuclear lumen                                | CC | 3241 | 605  | 4 11E-07   |
| GO 0043228 | non-membrane-bounded organelle               | CC | 2966 | 551  | 3 81E-06   |
| GO 0043232 | intracellular non-membrane-bounded organelle | CC | 2962 | 550  | 4 17E-06   |
| GO 0005654 | nucleoplasm                                  | CC | 2825 | 539  | 1 31E-07   |
| GO 0005856 | cytoskeleton                                 | CC | 1380 | 279  | 4 03E-06   |
| GO 0044430 | cytoskeletal part                            | CC | 1061 | 216  | 3 71E-05   |
| GO 0120025 | plasma membrane bounded cell projection      | CC | 1105 | 196  | 0 04968218 |
| GO 0015630 | microtubule cytoskeleton                     | CC | 862  | 187  | 2 42E-06   |
| GO 0005694 | chromosome                                   | CC | 819  | 176  | 8 95E-06   |
| GO 0044451 | nucleoplasm part                             | CC | 911  | 169  | 0 01561629 |
| GO 0097458 | neuron part                                  | CC | 887  | 161  | 0 0364153  |
| GO 0044427 | chromosomal part                             | CC | 714  | 153  | 4 16E-05   |
| GO 1990234 | transferase complex                          | CC | 656  | 125  | 0 01610277 |
| GO 0005815 | microtubule organizing center                | CC | 554  | 122  | 7 53E-05   |
| GO 0016604 | nuclear body                                 | CC | 610  | 116  | 0 02107382 |
| GO 0098590 | plasma membrane region                       | CC | 588  | 113  | 0 01690457 |
| GO 0045202 | synapse                                      | CC | 599  | 111  | 0 04540064 |
| GO 0099512 | supramolecular fiber                         | CC | 506  | 102  | 0 00594146 |
| GO 0099081 | supramolecular polymer                       | CC | 510  | 102  | 0 00750568 |
| GO 0099080 | supramolecular complex                       | CC | 511  | 102  | 0 00794777 |
| GO 0005813 | centrosome                                   | CC | 407  | 92   | 0 00022283 |
| GO 0099513 | polymeric cytoskeletal fiber                 | CC | 405  | 88   | 0 00114255 |
| GO 0000785 | chromatin                                    | CC | 406  | 81   | 0 01690854 |
| GO 0098687 | chromosomal region                           | CC | 291  | 74   | 1 75E-05   |
| GO 0005635 | nuclear envelope                             | CC | 355  | 70   | 0 03161558 |
| GO 0030424 | axon                                         | CC | 314  | 65   | 0 01421588 |
| GO 0005874 | microtubule                                  | CC | 288  | 62   | 0 00708529 |
| GO 0005819 | spindle                                      | CC | 283  | 61   | 0 00731256 |
| GO 0005667 | transcription factor complex                 | CC | 236  | 59   | 0 00019844 |
| GO 0005911 | cell-cell junction                           | CC | 289  | 59   | 0 02447938 |
| GO 0031252 | cell leading edge                            | CC | 264  | 53   | 0 04176216 |
| GO 0000793 | condensed chromosome                         | CC | 173  | 52   | 2 10E-06   |
| GO 0000775 | chromosome centromeric region                | CC | 173  | 50   | 1 11E-05   |
| GO 0033267 | axon part                                    | CC | 205  | 48   | 0 00322499 |
| GO 0150034 | distal axon                                  | CC | 153  | 39   | 0 0015324  |
| GO 0044450 | microtubule organizing center part           | CC | 132  | 38   | 0 00013257 |
| GO 0098978 | glutamatergic synapse                        | CC | 178  | 38   | 0 03374955 |
| GO 0000776 | kinetochore                                  | CC | 125  | 37   | 8 57E-05   |
| GO 0044798 | nuclear transcription factor complex         | CC | 146  | 37   | 0 00222507 |
| GO 0000779 | condensed chromosome centromeric region      | CC | 108  | 33   | 0 00010343 |
| GO 0000777 | condensed chromosome kinetochore             | CC | 97   | 31   | 6 52E-05   |
| GO 0030427 | site of polarized growth                     | CC | 112  | 31   | 0 00109411 |
| GO 0030426 | growth cone                                  | CC | 111  | 30   | 0 00196207 |
| GO 0090575 | RNA polymerase transcription factor complex  | CC | 122  | 29   | 0 01558058 |
| GO 0005814 | centriole                                    | CC | 97   | 28   | 0 00092271 |
| GO 0043296 | apical junction complex                      | CC | 103  | 25   | 0 01833303 |
| GO 0070160 | tight junction                               | CC | 91   | 24   | 0 00732535 |
| GO 0005923 | bicellular tight junction                    | CC | 87   | 22   | 0 01635945 |
| GO 0097223 | sperm part                                   | CC | 79   | 20   | 0 02114351 |
| GO 0072686 | mitotic spindle                              | CC | 85   | 20   | 0 04375609 |
| GO 0032155 | cell division site part                      | CC | 54   | 17   | 0 00333847 |
| GO 0032153 | cell division site                           | CC | 57   | 17   | 0 00616686 |
| GO 0032154 | cleavage furrow                              | CC | 46   | 16   | 0 0013708  |
| GO 0001669 | acrosomal vesicle                            | CC | 46   | 15   | 0 00391655 |
| GO 0090734 | site of DNA damage                           | CC | 55   | 15   | 0 0224885  |
| GO 0005657 | replication fork                             | CC | 57   | 15   | 0 03062643 |
| GO 0005871 | kinesin complex                              | CC | 39   | 13   | 0 00571023 |
| GO 0031091 | platelet alpha granule                       | CC | 44   | 13   | 0 01690206 |
| GO 0045171 | intercellular bridge                         | CC | 45   | 13   | 0 02039293 |
| GO 1990391 | DNA repair complex                           | CC | 38   | 12   | 0 01240755 |
| GO 0035861 | site of double-strand break                  | CC | 44   | 12   | 0 03884151 |
| GO 0031093 | platelet alpha granule lumen                 | CC | 31   | 10   | 0 01857752 |
| GO 0071782 | endoplasmic reticulum tubular network        | CC | 20   | 7    | 0 02983908 |
| GO 0044295 | axonal growth cone                           | CC | 20   | 7    | 0 02983908 |
| GO 0035327 | transcriptionally active chromatin           | CC | 20   | 7    | 0 02983908 |
| GO 0008305 | integrin complex                             | CC | 16   | 6    | 0 03104621 |
| GO 0098636 | protein complex involved in cell adhesion    | CC | 16   | 6    | 0 03104621 |
| GO 0000242 | pericentriolar material                      | CC | 17   | 6    | 0 04167676 |



|            |                                                                  |    |      |      |            |
|------------|------------------------------------------------------------------|----|------|------|------------|
| GO 0031010 | SW-type complex                                                  | CC | 8    | 5    | 0 00376941 |
| GO 0036513 | Derlin-1 retrotranslocation complex                              | CC | 9    | 5    | 0 00737104 |
| GO 0032300 | mismatch repair complex                                          | CC | 9    | 5    | 0 00737104 |
| GO 0008278 | cohesin complex                                                  | CC | 9    | 5    | 0 00737104 |
| GO 0016471 | vacuolar proton-transporting V-type ATPase complex               | CC | 13   | 5    | 0 0432739  |
| GO 0031616 | spindle pole centrosome                                          | CC | 13   | 5    | 0 0432739  |
| GO 0031262 | Ndc80 complex                                                    | CC | 4    | 4    | 0 00064645 |
| GO 0033391 | chromatoid body                                                  | CC | 6    | 4    | 0 00738968 |
| GO 0035748 | myelin sheath abaxonal region                                    | CC | 6    | 4    | 0 00738968 |
| GO 0030123 | AP-3 adaptor complex                                             | CC | 8    | 4    | 0 02637563 |
| GO 0030877 | beta-catenin destruction complex                                 | CC | 9    | 4    | 0 0415793  |
| GO 1990023 | mitotic spindle midzone                                          | CC | 9    | 4    | 0 0415793  |
| GO 0048188 | Set1C/COMPASS complex                                            | CC | 9    | 4    | 0 0415793  |
| GO 0031414 | N-terminal protein acetyltransferase complex                     | CC | 9    | 4    | 0 0415793  |
| GO 0098536 | deuterosome                                                      | CC | 3    | 3    | 0 00405706 |
| GO 0098981 | cholinergic synapse                                              | CC | 4    | 3    | 0 0142889  |
| GO 0031415 | NatA complex                                                     | CC | 4    | 3    | 0 0142889  |
| GO 0035061 | interchromatin granule                                           | CC | 4    | 3    | 0 0142889  |
| GO 0016589 | NURF complex                                                     | CC | 5    | 3    | 0 03149163 |
| GO 1990590 | ATF1-ATF4 transcription factor complex                           | CC | 2    | 2    | 0 02544967 |
| GO 1990589 | ATF4-CREB1 transcription factor complex                          | CC | 2    | 2    | 0 02544967 |
| GO 1990617 | CHOP-ATF4 complex                                                | CC | 2    | 2    | 0 02544967 |
| GO 0032301 | MutSalpha complex                                                | CC | 2    | 2    | 0 02544967 |
| GO 0005674 | transcription factor TF F complex                                | CC | 2    | 2    | 0 02544967 |
| GO 0005900 | oncosterin-M receptor complex                                    | CC | 2    | 2    | 0 02544967 |
| GO 0034667 | integrin alpha3-beta1 complex                                    | CC | 2    | 2    | 0 02544967 |
| GO 0032302 | MutSbeta complex                                                 | CC | 2    | 2    | 0 02544967 |
| GO 0000308 | cytoplasmic cyclin-dependent protein kinase holoenzyme complex   | CC | 2    | 2    | 0 02544967 |
| GO 0031372 | UBC13-MMS2 complex                                               | CC | 2    | 2    | 0 02544967 |
| GO 0032807 | DNA ligase V complex                                             | CC | 2    | 2    | 0 02544967 |
| GO 0044308 | axonal spine                                                     | CC | 2    | 2    | 0 02544967 |
| GO 0031213 | RSF complex                                                      | CC | 2    | 2    | 0 02544967 |
| GO 0071020 | post-spliceosomal complex                                        | CC | 2    | 2    | 0 02544967 |
| GO 1990112 | RQC complex                                                      | CC | 2    | 2    | 0 02544967 |
| GO 0032116 | SMC loading complex                                              | CC | 2    | 2    | 0 02544967 |
| GO 0090694 | Scc2-Scc4 cohesin loading complex                                | CC | 2    | 2    | 0 02544967 |
| GO 0036502 | Derlin-1-V MP complex                                            | CC | 2    | 2    | 0 02544967 |
| GO 0042720 | mitochondrial inner membrane peptidase complex                   | CC | 2    | 2    | 0 02544967 |
| GO 0003674 | molecular function                                               | MF | 9800 | 1601 | 0 00089365 |
| GO 0005488 | binding                                                          | MF | 8891 | 1476 | 6 85E-05   |
| GO 0005515 | protein binding                                                  | MF | 7495 | 1290 | 6 15E-08   |
| GO 0097159 | organic cyclic compound binding                                  | MF | 3968 | 681  | 0 00528269 |
| GO 1901363 | heterocyclic compound binding                                    | MF | 3934 | 676  | 0 00487938 |
| GO 0003824 | catalytic activity                                               | MF | 3860 | 650  | 0 03387451 |
| GO 0043168 | anion binding                                                    | MF | 1765 | 315  | 0 0104944  |
| GO 0036094 | small molecule binding                                           | MF | 1646 | 294  | 0 01289431 |
| GO 0019899 | enzyme binding                                                   | MF | 1640 | 289  | 0 02595502 |
| GO 0000166 | nucleotide binding                                               | MF | 1467 | 275  | 0 00116533 |
| GO 1901265 | nucleoside phosphate binding                                     | MF | 1467 | 275  | 0 00116533 |
| GO 0140096 | catalytic activity acting on a protein                           | MF | 1509 | 269  | 0 01889628 |
| GO 0097367 | carbohydrate derivative binding                                  | MF | 1426 | 268  | 0 00116209 |
| GO 0017076 | purine nucleotide binding                                        | MF | 1301 | 250  | 0 0004633  |
| GO 0032553 | ribonucleotide binding                                           | MF | 1294 | 249  | 0 00043689 |
| GO 0032555 | purine ribonucleotide binding                                    | MF | 1286 | 248  | 0 00039221 |
| GO 0035639 | purine ribonucleoside triphosphate binding                       | MF | 1250 | 244  | 0 00020437 |
| GO 0008144 | drug binding                                                     | MF | 1135 | 217  | 0 0014823  |
| GO 0140110 | transcription regulator activity                                 | MF | 1224 | 217  | 0 0409362  |
| GO 0042802 | identical protein binding                                        | MF | 1100 | 213  | 0 00083799 |
| GO 0030554 | adenyl nucleotide binding                                        | MF | 1066 | 206  | 0 00113752 |
| GO 0032559 | adenyl ribonucleotide binding                                    | MF | 1053 | 204  | 0 00105635 |
| GO 0005524 | ATP binding                                                      | MF | 1019 | 200  | 0 00059992 |
| GO 0046983 | protein dimerization activity                                    | MF | 778  | 146  | 0 01637497 |
| GO 0044877 | protein-containing complex binding                               | MF | 743  | 144  | 0 00562456 |
| GO 0008092 | cytoskeletal protein binding                                     | MF | 594  | 133  | 1 53E-05   |
| GO 0016462 | pyrophosphatase activity                                         | MF | 631  | 123  | 0 00838328 |
| GO 0016817 | hydrolase activity acting on acid anhydrides                     | MF | 633  | 123  | 0 00927524 |
| GO 0016818 | hydrolase activity acting on acid anhydrides in phosphorus-conta | MF | 633  | 123  | 0 00927524 |
| GO 0017111 | nucleoside-triphosphatase activity                               | MF | 597  | 119  | 0 00457015 |
| GO 0016301 | kinase activity                                                  | MF | 576  | 107  | 0 04605819 |
| GO 0019904 | protein domain specific binding                                  | MF | 496  | 102  | 0 00320067 |
| GO 0004672 | protein kinase activity                                          | MF | 437  | 84   | 0 03549126 |
| GO 0003682 | chromatin binding                                                | MF | 392  | 77   | 0 0273333  |
| GO 0016887 | ATPase activity                                                  | MF | 311  | 67   | 0 00518074 |
| GO 0004674 | protein serine/threonine kinase activity                         | MF | 336  | 66   | 0 03868878 |
| GO 0015631 | tubulin binding                                                  | MF | 218  | 59   | 1 74E-05   |
| GO 0003779 | actin binding                                                    | MF | 253  | 53   | 0 0201512  |
| GO 0001228 | DNA-binding transcription activator activity RNA polymerase -spe | MF | 249  | 51   | 0 03270073 |
| GO 0044389 | ubiquitin-like protein ligase binding                            | MF | 252  | 51   | 0 03971148 |
| GO 0031625 | ubiquitin protein ligase binding                                 | MF | 238  | 50   | 0 02235539 |
| GO 0008017 | microtubule binding                                              | MF | 163  | 44   | 0 0002087  |
| GO 0003714 | transcription corepressor activity                               | MF | 174  | 42   | 0 00314787 |
| GO 0061630 | ubiquitin protein ligase activity                                | MF | 153  | 35   | 0 01537163 |
| GO 0061659 | ubiquitin-like protein ligase activity                           | MF | 157  | 35   | 0 02237973 |
| GO 0042393 | histone binding                                                  | MF | 157  | 34   | 0 03558382 |
| GO 0008234 | cysteine-type peptidase activity                                 | MF | 135  | 30   | 0 03389516 |



|            |                                                                      |    |     |    |            |
|------------|----------------------------------------------------------------------|----|-----|----|------------|
| GO 0030674 | protein binding bridging                                             | MF | 115 | 29 | 0 00677818 |
| GO 0060090 | molecular adaptor activity                                           | MF | 133 | 29 | 0 04558014 |
| GO 0051015 | actin filament binding                                               | MF | 116 | 27 | 0 02478394 |
| GO 0003697 | single-stranded DNA binding                                          | MF | 88  | 26 | 0 00094866 |
| GO 0005516 | calmodulin binding                                                   | MF | 103 | 26 | 0 00986173 |
| GO 0001085 | RNA polymerase transcription factor binding                          | MF | 101 | 25 | 0 0144078  |
| GO 0002020 | protease binding                                                     | MF | 85  | 21 | 0 02402673 |
| GO 0036459 | thiol-dependent ubiquitinyl hydrolase activity                       | MF | 84  | 20 | 0 03911389 |
| GO 0101005 | ubiquitinyl hydrolase activity                                       | MF | 84  | 20 | 0 03911389 |
| GO 0005178 | integrin binding                                                     | MF | 66  | 19 | 0 00597887 |
| GO 0008094 | DNA-dependent ATPase activity                                        | MF | 73  | 19 | 0 01826845 |
| GO 0003684 | damaged DNA binding                                                  | MF | 60  | 18 | 0 00458169 |
| GO 0004197 | cysteine-type endopeptidase activity                                 | MF | 72  | 18 | 0 03127329 |
| GO 0019208 | phosphatase regulator activity                                       | MF | 68  | 17 | 0 03567906 |
| GO 0003777 | microtubule motor activity                                           | MF | 50  | 15 | 0 0092318  |
| GO 0003705 | transcription factor activity RNA polymerase distal enhancer sec     | MF | 60  | 15 | 0 04659875 |
| GO 0030165 | PDZ domain binding                                                   | MF | 53  | 14 | 0 0349222  |
| GO 0019905 | syntaxin binding                                                     | MF | 42  | 12 | 0 02756272 |
| GO 0001618 | virus receptor activity                                              | MF | 45  | 12 | 0 04555009 |
| GO 0104005 | hijacked molecular function                                          | MF | 45  | 12 | 0 04555009 |
| GO 0016877 | ligase activity forming carbon-sulfur bonds                          | MF | 26  | 10 | 0 00473171 |
| GO 0016830 | carbon-carbon lyase activity                                         | MF | 35  | 10 | 0 04232112 |
| GO 0000217 | DNA secondary structure binding                                      | MF | 18  | 9  | 0 00080749 |
| GO 0016831 | carboxy-lyase activity                                               | MF | 24  | 9  | 0 00878819 |
| GO 0046915 | transition metal ion transmembrane transporter activity              | MF | 29  | 9  | 0 03200708 |
| GO 0048487 | beta-tubulin binding                                                 | MF | 30  | 9  | 0 0394567  |
| GO 0043531 | ADP binding                                                          | MF | 31  | 9  | 0 04799818 |
| GO 0030275 | LRR domain binding                                                   | MF | 15  | 8  | 0 00092532 |
| GO 0001205 | distal enhancer DNA-binding transcription activator activity RNA p   | MF | 23  | 8  | 0 02150582 |
| GO 0070717 | poly-purine tract binding                                            | MF | 25  | 8  | 0 03541272 |
| GO 0008143 | poly(A) binding                                                      | MF | 19  | 7  | 0 02240425 |
| GO 0008171 | O-methyltransferase activity                                         | MF | 21  | 7  | 0 03876916 |
| GO 0004364 | glutathione transferase activity                                     | MF | 15  | 6  | 0 02235333 |
| GO 0008574 | ATP-dependent microtubule motor activity plus-end-directed           | MF | 16  | 6  | 0 03104621 |
| GO 0016878 | acid-thiol ligase activity                                           | MF | 16  | 6  | 0 03104621 |
| GO 0043522 | leucine zipper domain binding                                        | MF | 9   | 5  | 0 00737104 |
| GO 0097153 | cysteine-type endopeptidase activity involved in apoptotic process   | MF | 11  | 5  | 0 02045912 |
| GO 0030983 | mismatched DNA binding                                               | MF | 11  | 5  | 0 02045912 |
| GO 0016405 | CoA-ligase activity                                                  | MF | 12  | 5  | 0 03054939 |
| GO 0016783 | sulfurtransferase activity                                           | MF | 12  | 5  | 0 03054939 |
| GO 0038191 | neuropilin binding                                                   | MF | 13  | 5  | 0 0432739  |
| GO 1990381 | ubiquitin-specific protease binding                                  | MF | 13  | 5  | 0 0432739  |
| GO 0032135 | DNA insertion or deletion binding                                    | MF | 5   | 4  | 0 00282041 |
| GO 0043515 | kinetochore binding                                                  | MF | 6   | 4  | 0 00738968 |
| GO 0031957 | very long-chain fatty acid-CoA ligase activity                       | MF | 7   | 4  | 0 01507252 |
| GO 0140035 | ubiquitination-like modification-dependent protein binding           | MF | 7   | 4  | 0 01507252 |
| GO 0140036 | ubiquitin-dependent protein binding                                  | MF | 7   | 4  | 0 01507252 |
| GO 0030306 | ADP-ribosylation factor binding                                      | MF | 7   | 4  | 0 01507252 |
| GO 0032404 | mismatch repair complex binding                                      | MF | 9   | 4  | 0 0415793  |
| GO 0032357 | oxidized purine DNA binding                                          | MF | 9   | 4  | 0 0415793  |
| GO 0015645 | fatty acid ligase activity                                           | MF | 9   | 4  | 0 0415793  |
| GO 0032138 | single base insertion or deletion binding                            | MF | 3   | 3  | 0 00405706 |
| GO 0032142 | single guanine insertion binding                                     | MF | 3   | 3  | 0 00405706 |
| GO 0032143 | single thymine insertion binding                                     | MF | 3   | 3  | 0 00405706 |
| GO 0032137 | guanine/thymine mispair binding                                      | MF | 4   | 3  | 0 0142889  |
| GO 0005138 | interleukin-6 receptor binding                                       | MF | 4   | 3  | 0 0142889  |
| GO 0034594 | phosphatidylinositol trisphosphate phosphatase activity              | MF | 4   | 3  | 0 0142889  |
| GO 0032405 | MutLalpha complex binding                                            | MF | 5   | 3  | 0 03149163 |
| GO 0004448 | isocitrate dehydrogenase activity                                    | MF | 5   | 3  | 0 03149163 |
| GO 0004445 | inositol-polyphosphate 5-phosphatase activity                        | MF | 5   | 3  | 0 03149163 |
| GO 0004679 | AMP-activated protein kinase activity                                | MF | 5   | 3  | 0 03149163 |
| GO 0004597 | peptide-aspartate beta-dioxygenase activity                          | MF | 2   | 2  | 0 02544967 |
| GO 0099626 | voltage-gated calcium channel activity involved in regulation of pre | MF | 2   | 2  | 0 02544967 |
| GO 0008240 | tripeptidyl-peptidase activity                                       | MF | 2   | 2  | 0 02544967 |
| GO 0004132 | dCMP deaminase activity                                              | MF | 2   | 2  | 0 02544967 |
| GO 0008597 | calcium-dependent protein serine/threonine phosphatase regulat       | MF | 2   | 2  | 0 02544967 |
| GO 0050508 | glucuronosyl-N-acetylglucosaminyl-proteoglycan 4-alpha-N-acetyl      | MF | 2   | 2  | 0 02544967 |
| GO 0050509 | N-acetylglucosaminyl-proteoglycan 4-beta-glucuronosyltransferase     | MF | 2   | 2  | 0 02544967 |
| GO 0015057 | thrombin-activated receptor activity                                 | MF | 2   | 2  | 0 02544967 |
| GO 0004450 | isocitrate dehydrogenase (NADP+) activity                            | MF | 2   | 2  | 0 02544967 |
| GO 0004924 | oncostatin-M receptor activity                                       | MF | 2   | 2  | 0 02544967 |
| GO 0004572 | mannosyl-oligosaccharide 1 3-1 6-alpha-mannosidase activity          | MF | 2   | 2  | 0 02544967 |
| GO 0032181 | dinucleotide repeat insertion binding                                | MF | 2   | 2  | 0 02544967 |
| GO 0000406 | double-strand/single-strand DNA junction binding                     | MF | 2   | 2  | 0 02544967 |
| GO 0061860 | DNA clamp unloader activity                                          | MF | 2   | 2  | 0 02544967 |
| GO 0004649 | poly(ADP-ribose) glycohydrolase activity                             | MF | 2   | 2  | 0 02544967 |



| Year       | 2010 | 2011 | 2012 | 2013 | 2014 | 2015 | 2016 | 2017 | 2018 | 2019 | 2020 | 2021 | 2022 | 2023 | 2024 | 2025 | 2026 | 2027 | 2028 | 2029 | 2030 | 2031 | 2032 | 2033 | 2034 | 2035 | 2036 | 2037 | 2038 | 2039 | 2040 | 2041 | 2042 | 2043 | 2044 | 2045 | 2046 | 2047 | 2048 | 2049 | 2050 | 2051 | 2052 | 2053 | 2054 | 2055 | 2056 | 2057 | 2058 | 2059 | 2060 | 2061 | 2062 | 2063 | 2064 | 2065 | 2066 | 2067 | 2068 | 2069 | 2070 | 2071 | 2072 | 2073 | 2074 | 2075 | 2076 | 2077 | 2078 | 2079 | 2080 | 2081 | 2082 | 2083 | 2084 | 2085 | 2086 | 2087 | 2088 | 2089 | 2090 | 2091 | 2092 | 2093 | 2094 | 2095 | 2096 | 2097 | 2098 | 2099 | 2100 |      |      |      |      |      |      |      |      |      |      |      |      |      |      |      |      |      |      |      |      |      |      |      |      |      |      |      |      |      |      |      |      |      |      |      |      |      |      |      |      |      |      |      |      |      |      |      |      |      |      |      |      |      |      |      |      |      |      |      |      |      |      |      |      |      |      |      |      |      |      |      |      |      |      |      |      |      |      |      |      |      |      |      |      |      |      |      |      |      |      |      |      |      |      |      |      |      |      |      |      |      |      |      |      |      |      |      |      |      |      |      |      |      |      |      |      |      |      |      |      |      |      |      |      |      |      |      |      |      |      |      |      |      |      |      |      |      |      |      |      |      |      |      |      |      |      |      |      |      |      |      |      |      |      |      |      |      |      |      |      |      |      |      |      |      |      |      |      |      |      |      |      |      |      |      |      |      |      |      |      |      |      |      |      |      |      |      |      |      |      |      |      |      |      |      |      |      |      |      |      |      |      |      |      |      |      |      |      |      |      |      |      |      |      |      |      |      |      |      |      |      |      |      |      |      |      |      |      |      |      |      |      |      |      |      |      |      |      |      |      |      |      |      |      |      |      |      |      |      |      |      |      |      |      |      |      |      |      |      |      |      |      |      |      |      |      |      |      |      |      |      |      |      |      |      |      |      |      |      |      |      |      |      |      |      |      |      |      |      |      |      |      |      |      |      |      |      |      |      |      |      |      |      |      |      |      |      |      |      |      |      |      |      |      |      |      |      |      |      |      |      |      |      |      |      |      |      |      |      |      |      |      |      |      |      |      |      |      |      |      |      |      |      |      |      |      |      |      |      |      |      |      |      |      |      |      |      |      |      |      |      |      |      |      |      |      |      |      |      |      |      |      |      |      |      |      |      |      |      |      |      |      |      |      |      |      |      |      |      |      |      |      |      |      |      |      |      |      |      |      |      |      |      |      |      |      |      |      |      |      |      |      |      |      |      |      |      |      |      |      |      |      |      |      |      |      |      |      |      |      |      |      |      |      |      |      |      |      |      |      |      |      |      |      |      |      |      |      |      |      |      |      |      |      |      |      |      |      |      |      |      |      |      |      |      |      |      |      |      |      |      |      |      |      |      |      |      |      |      |      |      |      |      |      |      |      |      |      |      |      |      |      |      |      |      |      |      |      |      |      |      |      |      |      |      |      |      |      |      |      |      |      |      |      |      |      |      |      |      |      |      |      |      |      |      |      |      |      |      |      |      |      |      |      |      |      |      |      |      |      |      |      |      |      |      |      |      |      |      |      |      |      |      |      |      |      |      |      |      |      |      |      |      |      |      |      |      |      |      |      |      |      |      |      |      |      |      |      |      |      |      |      |      |      |      |      |      |      |      |      |      |      |      |      |      |      |      |      |      |      |      |      |      |      |      |      |      |      |      |      |      |      |      |      |      |      |      |      |      |      |      |      |      |      |      |      |      |      |      |      |      |      |      |      |      |      |      |      |      |      |      |      |      |      |      |      |      |      |      |      |      |      |      |      |      |      |      |      |      |      |      |      |      |      |      |      |      |      |      |      |      |      |      |      |      |      |      |      |      |      |      |      |      |      |      |      |      |      |      |      |      |      |      |      |      |      |      |      |      |      |      |      |      |      |      |      |      |      |      |      |      |      |      |      |      |      |      |      |      |      |      |      |      |      |      |      |      |      |      |      |      |      |      |      |      |      |      |      |      |      |      |      |      |      |      |      |      |      |      |      |      |      |      |      |      |      |      |      |      |      |      |      |      |      |      |      |      |      |      |      |      |      |      |      |      |      |      |      |      |      |      |      |      |      |      |      |      |      |      |      |      |      |      |      |      |      |      |      |      |      |      |      |      |      |      |      |      |      |      |      |      |      |      |      |      |      |      |      |      |      |      |      |      |      |      |      |      |      |      |      |      |      |      |      |       |
|------------|------|------|------|------|------|------|------|------|------|------|------|------|------|------|------|------|------|------|------|------|------|------|------|------|------|------|------|------|------|------|------|------|------|------|------|------|------|------|------|------|------|------|------|------|------|------|------|------|------|------|------|------|------|------|------|------|------|------|------|------|------|------|------|------|------|------|------|------|------|------|------|------|------|------|------|------|------|------|------|------|------|------|------|------|------|------|------|------|------|------|------|------|------|------|------|------|------|------|------|------|------|------|------|------|------|------|------|------|------|------|------|------|------|------|------|------|------|------|------|------|------|------|------|------|------|------|------|------|------|------|------|------|------|------|------|------|------|------|------|------|------|------|------|------|------|------|------|------|------|------|------|------|------|------|------|------|------|------|------|------|------|------|------|------|------|------|------|------|------|------|------|------|------|------|------|------|------|------|------|------|------|------|------|------|------|------|------|------|------|------|------|------|------|------|------|------|------|------|------|------|------|------|------|------|------|------|------|------|------|------|------|------|------|------|------|------|------|------|------|------|------|------|------|------|------|------|------|------|------|------|------|------|------|------|------|------|------|------|------|------|------|------|------|------|------|------|------|------|------|------|------|------|------|------|------|------|------|------|------|------|------|------|------|------|------|------|------|------|------|------|------|------|------|------|------|------|------|------|------|------|------|------|------|------|------|------|------|------|------|------|------|------|------|------|------|------|------|------|------|------|------|------|------|------|------|------|------|------|------|------|------|------|------|------|------|------|------|------|------|------|------|------|------|------|------|------|------|------|------|------|------|------|------|------|------|------|------|------|------|------|------|------|------|------|------|------|------|------|------|------|------|------|------|------|------|------|------|------|------|------|------|------|------|------|------|------|------|------|------|------|------|------|------|------|------|------|------|------|------|------|------|------|------|------|------|------|------|------|------|------|------|------|------|------|------|------|------|------|------|------|------|------|------|------|------|------|------|------|------|------|------|------|------|------|------|------|------|------|------|------|------|------|------|------|------|------|------|------|------|------|------|------|------|------|------|------|------|------|------|------|------|------|------|------|------|------|------|------|------|------|------|------|------|------|------|------|------|------|------|------|------|------|------|------|------|------|------|------|------|------|------|------|------|------|------|------|------|------|------|------|------|------|------|------|------|------|------|------|------|------|------|------|------|------|------|------|------|------|------|------|------|------|------|------|------|------|------|------|------|------|------|------|------|------|------|------|------|------|------|------|------|------|------|------|------|------|------|------|------|------|------|------|------|------|------|------|------|------|------|------|------|------|------|------|------|------|------|------|------|------|------|------|------|------|------|------|------|------|------|------|------|------|------|------|------|------|------|------|------|------|------|------|------|------|------|------|------|------|------|------|------|------|------|------|------|------|------|------|------|------|------|------|------|------|------|------|------|------|------|------|------|------|------|------|------|------|------|------|------|------|------|------|------|------|------|------|------|------|------|------|------|------|------|------|------|------|------|------|------|------|------|------|------|------|------|------|------|------|------|------|------|------|------|------|------|------|------|------|------|------|------|------|------|------|------|------|------|------|------|------|------|------|------|------|------|------|------|------|------|------|------|------|------|------|------|------|------|------|------|------|------|------|------|------|------|------|------|------|------|------|------|------|------|------|------|------|------|------|------|------|------|------|------|------|------|------|------|------|------|------|------|------|------|------|------|------|------|------|------|------|------|------|------|------|------|------|------|------|------|------|------|------|------|------|------|------|------|------|------|------|------|------|------|------|------|------|------|------|------|------|------|------|------|------|------|------|------|------|------|------|------|------|------|------|------|------|------|------|------|------|------|------|------|------|------|------|------|------|------|------|------|------|------|------|------|------|------|------|------|------|------|------|------|------|------|------|------|------|------|------|------|------|------|------|------|------|------|------|------|------|------|------|------|------|------|------|------|------|------|------|------|------|------|------|------|------|------|------|------|------|------|------|------|------|------|------|------|------|------|------|------|------|------|------|------|------|------|------|------|------|------|------|------|------|------|------|------|------|------|------|------|------|------|------|------|------|------|------|------|------|------|------|------|------|------|------|------|------|------|------|------|------|------|------|------|------|------|------|------|------|------|------|------|------|------|------|------|------|------|------|------|------|------|------|------|------|------|------|------|------|------|------|------|------|------|------|------|------|------|------|------|------|------|------|------|-------|
| Population | 7.5  | 7.6  | 7.7  | 7.8  | 7.9  | 8.0  | 8.1  | 8.2  | 8.3  | 8.4  | 8.5  | 8.6  | 8.7  | 8.8  | 8.9  | 9.0  | 9.1  | 9.2  | 9.3  | 9.4  | 9.5  | 9.6  | 9.7  | 9.8  | 9.9  | 10.0 | 10.1 | 10.2 | 10.3 | 10.4 | 10.5 | 10.6 | 10.7 | 10.8 | 10.9 | 11.0 | 11.1 | 11.2 | 11.3 | 11.4 | 11.5 | 11.6 | 11.7 | 11.8 | 11.9 | 12.0 | 12.1 | 12.2 | 12.3 | 12.4 | 12.5 | 12.6 | 12.7 | 12.8 | 12.9 | 13.0 | 13.1 | 13.2 | 13.3 | 13.4 | 13.5 | 13.6 | 13.7 | 13.8 | 13.9 | 14.0 | 14.1 | 14.2 | 14.3 | 14.4 | 14.5 | 14.6 | 14.7 | 14.8 | 14.9 | 15.0 | 15.1 | 15.2 | 15.3 | 15.4 | 15.5 | 15.6 | 15.7 | 15.8 | 15.9 | 16.0 | 16.1 | 16.2 | 16.3 | 16.4 | 16.5 | 16.6 | 16.7 | 16.8 | 16.9 | 17.0 | 17.1 | 17.2 | 17.3 | 17.4 | 17.5 | 17.6 | 17.7 | 17.8 | 17.9 | 18.0 | 18.1 | 18.2 | 18.3 | 18.4 | 18.5 | 18.6 | 18.7 | 18.8 | 18.9 | 19.0 | 19.1 | 19.2 | 19.3 | 19.4 | 19.5 | 19.6 | 19.7 | 19.8 | 19.9 | 20.0 | 20.1 | 20.2 | 20.3 | 20.4 | 20.5 | 20.6 | 20.7 | 20.8 | 20.9 | 21.0 | 21.1 | 21.2 | 21.3 | 21.4 | 21.5 | 21.6 | 21.7 | 21.8 | 21.9 | 22.0 | 22.1 | 22.2 | 22.3 | 22.4 | 22.5 | 22.6 | 22.7 | 22.8 | 22.9 | 23.0 | 23.1 | 23.2 | 23.3 | 23.4 | 23.5 | 23.6 | 23.7 | 23.8 | 23.9 | 24.0 | 24.1 | 24.2 | 24.3 | 24.4 | 24.5 | 24.6 | 24.7 | 24.8 | 24.9 | 25.0 | 25.1 | 25.2 | 25.3 | 25.4 | 25.5 | 25.6 | 25.7 | 25.8 | 25.9 | 26.0 | 26.1 | 26.2 | 26.3 | 26.4 | 26.5 | 26.6 | 26.7 | 26.8 | 26.9 | 27.0 | 27.1 | 27.2 | 27.3 | 27.4 | 27.5 | 27.6 | 27.7 | 27.8 | 27.9 | 28.0 | 28.1 | 28.2 | 28.3 | 28.4 | 28.5 | 28.6 | 28.7 | 28.8 | 28.9 | 29.0 | 29.1 | 29.2 | 29.3 | 29.4 | 29.5 | 29.6 | 29.7 | 29.8 | 29.9 | 30.0 | 30.1 | 30.2 | 30.3 | 30.4 | 30.5 | 30.6 | 30.7 | 30.8 | 30.9 | 31.0 | 31.1 | 31.2 | 31.3 | 31.4 | 31.5 | 31.6 | 31.7 | 31.8 | 31.9 | 32.0 | 32.1 | 32.2 | 32.3 | 32.4 | 32.5 | 32.6 | 32.7 | 32.8 | 32.9 | 33.0 | 33.1 | 33.2 | 33.3 | 33.4 | 33.5 | 33.6 | 33.7 | 33.8 | 33.9 | 34.0 | 34.1 | 34.2 | 34.3 | 34.4 | 34.5 | 34.6 | 34.7 | 34.8 | 34.9 | 35.0 | 35.1 | 35.2 | 35.3 | 35.4 | 35.5 | 35.6 | 35.7 | 35.8 | 35.9 | 36.0 | 36.1 | 36.2 | 36.3 | 36.4 | 36.5 | 36.6 | 36.7 | 36.8 | 36.9 | 37.0 | 37.1 | 37.2 | 37.3 | 37.4 | 37.5 | 37.6 | 37.7 | 37.8 | 37.9 | 38.0 | 38.1 | 38.2 | 38.3 | 38.4 | 38.5 | 38.6 | 38.7 | 38.8 | 38.9 | 39.0 | 39.1 | 39.2 | 39.3 | 39.4 | 39.5 | 39.6 | 39.7 | 39.8 | 39.9 | 40.0 | 40.1 | 40.2 | 40.3 | 40.4 | 40.5 | 40.6 | 40.7 | 40.8 | 40.9 | 41.0 | 41.1 | 41.2 | 41.3 | 41.4 | 41.5 | 41.6 | 41.7 | 41.8 | 41.9 | 42.0 | 42.1 | 42.2 | 42.3 | 42.4 | 42.5 | 42.6 | 42.7 | 42.8 | 42.9 | 43.0 | 43.1 | 43.2 | 43.3 | 43.4 | 43.5 | 43.6 | 43.7 | 43.8 | 43.9 | 44.0 | 44.1 | 44.2 | 44.3 | 44.4 | 44.5 | 44.6 | 44.7 | 44.8 | 44.9 | 45.0 | 45.1 | 45.2 | 45.3 | 45.4 | 45.5 | 45.6 | 45.7 | 45.8 | 45.9 | 46.0 | 46.1 | 46.2 | 46.3 | 46.4 | 46.5 | 46.6 | 46.7 | 46.8 | 46.9 | 47.0 | 47.1 | 47.2 | 47.3 | 47.4 | 47.5 | 47.6 | 47.7 | 47.8 | 47.9 | 48.0 | 48.1 | 48.2 | 48.3 | 48.4 | 48.5 | 48.6 | 48.7 | 48.8 | 48.9 | 49.0 | 49.1 | 49.2 | 49.3 | 49.4 | 49.5 | 49.6 | 49.7 | 49.8 | 49.9 | 50.0 | 50.1 | 50.2 | 50.3 | 50.4 | 50.5 | 50.6 | 50.7 | 50.8 | 50.9 | 51.0 | 51.1 | 51.2 | 51.3 | 51.4 | 51.5 | 51.6 | 51.7 | 51.8 | 51.9 | 52.0 | 52.1 | 52.2 | 52.3 | 52.4 | 52.5 | 52.6 | 52.7 | 52.8 | 52.9 | 53.0 | 53.1 | 53.2 | 53.3 | 53.4 | 53.5 | 53.6 | 53.7 | 53.8 | 53.9 | 54.0 | 54.1 | 54.2 | 54.3 | 54.4 | 54.5 | 54.6 | 54.7 | 54.8 | 54.9 | 55.0 | 55.1 | 55.2 | 55.3 | 55.4 | 55.5 | 55.6 | 55.7 | 55.8 | 55.9 | 56.0 | 56.1 | 56.2 | 56.3 | 56.4 | 56.5 | 56.6 | 56.7 | 56.8 | 56.9 | 57.0 | 57.1 | 57.2 | 57.3 | 57.4 | 57.5 | 57.6 | 57.7 | 57.8 | 57.9 | 58.0 | 58.1 | 58.2 | 58.3 | 58.4 | 58.5 | 58.6 | 58.7 | 58.8 | 58.9 | 59.0 | 59.1 | 59.2 | 59.3 | 59.4 | 59.5 | 59.6 | 59.7 | 59.8 | 59.9 | 60.0 | 60.1 | 60.2 | 60.3 | 60.4 | 60.5 | 60.6 | 60.7 | 60.8 | 60.9 | 61.0 | 61.1 | 61.2 | 61.3 | 61.4 | 61.5 | 61.6 | 61.7 | 61.8 | 61.9 | 62.0 | 62.1 | 62.2 | 62.3 | 62.4 | 62.5 | 62.6 | 62.7 | 62.8 | 62.9 | 63.0 | 63.1 | 63.2 | 63.3 | 63.4 | 63.5 | 63.6 | 63.7 | 63.8 | 63.9 | 64.0 | 64.1 | 64.2 | 64.3 | 64.4 | 64.5 | 64.6 | 64.7 | 64.8 | 64.9 | 65.0 | 65.1 | 65.2 | 65.3 | 65.4 | 65.5 | 65.6 | 65.7 | 65.8 | 65.9 | 66.0 | 66.1 | 66.2 | 66.3 | 66.4 | 66.5 | 66.6 | 66.7 | 66.8 | 66.9 | 67.0 | 67.1 | 67.2 | 67.3 | 67.4 | 67.5 | 67.6 | 67.7 | 67.8 | 67.9 | 68.0 | 68.1 | 68.2 | 68.3 | 68.4 | 68.5 | 68.6 | 68.7 | 68.8 | 68.9 | 69.0 | 69.1 | 69.2 | 69.3 | 69.4 | 69.5 | 69.6 | 69.7 | 69.8 | 69.9 | 70.0 | 70.1 | 70.2 | 70.3 | 70.4 | 70.5 | 70.6 | 70.7 | 70.8 | 70.9 | 71.0 | 71.1 | 71.2 | 71.3 | 71.4 | 71.5 | 71.6 | 71.7 | 71.8 | 71.9 | 72.0 | 72.1 | 72.2 | 72.3 | 72.4 | 72.5 | 72.6 | 72.7 | 72.8 | 72.9 | 73.0 | 73.1 | 73.2 | 73.3 | 73.4 | 73.5 | 73.6 | 73.7 | 73.8 | 73.9 | 74.0 | 74.1 | 74.2 | 74.3 | 74.4 | 74.5 | 74.6 | 74.7 | 74.8 | 74.9 | 75.0 | 75.1 | 75.2 | 75.3 | 75.4 | 75.5 | 75.6 | 75.7 | 75.8 | 75.9 | 76.0 | 76.1 | 76.2 | 76.3 | 76.4 | 76.5 | 76.6 | 76.7 | 76.8 | 76.9 | 77.0 | 77.1 | 77.2 | 77.3 | 77.4 | 77.5 | 77.6 | 77.7 | 77.8 | 77.9 | 78.0 | 78.1 | 78.2 | 78.3 | 78.4 | 78.5 | 78.6 | 78.7 | 78.8 | 78.9 | 79.0 | 79.1 | 79.2 | 79.3 | 79.4 | 79.5 | 79.6 | 79.7 | 79.8 | 79.9 | 80.0 | 80.1 | 80.2 | 80.3 | 80.4 | 80.5 | 80.6 | 80.7 | 80.8 | 80.9 | 81.0 | 81.1 | 81.2 | 81.3 | 81.4 | 81.5 | 81.6 | 81.7 | 81.8 | 81.9 | 82.0 | 82.1 | 82.2 | 82.3 | 82.4 | 82.5 | 82.6 | 82.7 | 82.8 | 82.9 | 83.0 | 83.1 | 83.2 | 83.3 | 83.4 | 83.5 | 83.6 | 83.7 | 83.8 | 83.9 | 84.0 | 84.1 | 84.2 | 84.3 | 84.4 | 84.5 | 84.6 | 84.7 | 84.8 | 84.9 | 85.0 | 85.1 | 85.2 | 85.3 | 85.4 | 85.5 | 85.6 | 85.7 | 85.8 | 85.9 | 86.0 | 86.1 | 86.2 | 86.3 | 86.4 | 86.5 | 86.6 | 86.7 | 86.8 | 86.9 | 87.0 | 87.1 | 87.2 | 87.3 | 87.4 | 87.5 | 87.6 | 87.7 | 87.8 | 87.9 | 88.0 | 88.1 | 88.2 | 88.3 | 88.4 | 88.5 | 88.6 | 88.7 | 88.8 | 88.9 | 89.0 | 89.1 | 89.2 | 89.3 | 89.4 | 89.5 | 89.6 | 89.7 | 89.8 | 89.9 | 90.0 | 90.1 | 90.2 | 90.3 | 90.4 | 90.5 | 90.6 | 90.7 | 90.8 | 90.9 | 91.0 | 91.1 | 91.2 | 91.3 | 91.4 | 91.5 | 91.6 | 91.7 | 91.8 | 91.9 | 92.0 | 92.1 | 92.2 | 92.3 | 92.4 | 92.5 | 92.6 | 92.7 | 92.8 | 92.9 | 93.0 | 93.1 | 93.2 | 93.3 | 93.4 | 93.5 | 93.6 | 93.7 | 93.8 | 93.9 | 94.0 | 94.1 | 94.2 | 94.3 | 94.4 | 94.5 | 94.6 | 94.7 | 94.8 | 94.9 | 95.0 | 95.1 | 95.2 | 95.3 | 95.4 | 95.5 | 95.6 | 95.7 | 95.8 | 95.9 | 96.0 | 96.1 | 96.2 | 96.3 | 96.4 | 96.5 | 96.6 | 96.7 | 96.8 | 96.9 | 97.0 | 97.1 | 97.2 | 97.3 | 97.4 | 97.5 | 97.6 | 97.7 | 97.8 | 97.9 | 98.0 | 98.1 | 98.2 | 98.3 | 98.4 | 98.5 | 98.6 | 98.7 | 98.8 | 98.9 | 99.0 | 99.1 | 99.2 | 99.3 | 99.4 | 99.5 | 99.6 | 99.7 | 99.8 | 99.9 | 100.0 |
